# Supplementary material
Source: publisher figshare collection journal article supplement (https://acs.figshare.com/ndownloader/files/5695014)
Supplement: Supplementary file 1 [file 5695014]

# ic0207000.cif

Compound 2

data_afc6s.xtl_master_file
#------------------------------------------------------------------------------
_audit_creation_date                  '1999-11-29'
_audit_creation_method                'by teXsan v1.8'
_audit_update_record
;
?
;
#------------------------------------------------------------------------------
_publ_requested_journal               ' ENTER JOURNAL NAME HERE'
_publ_requested_category              ' CHOOSE FI FM FO CI CM CO or AD'
_publ_contact_author_name             ' ENTER CONTACT NAME HERE

_publ_contact_author_address
;
    ENTER ADDRESS
;
_publ_contact_letter
;
     ENTER TEXT OF LETTER
;

_publ_requested_coeditor_name          ?
_publ_contact_author_phone            ' ENTER PHONE NUMBER '
_publ_contact_author_fax              ' ENTER FAX NUMBER '
_publ_contact_author_email            ' ENTER EMAIL ADDRESS '
loop_
_publ_author_name
_publ_author_footnote
_publ_author_address
' FIRST AUTHORS NAME '
;
   FIRST AUTHORS FOOTNOTES
;
;
   FIRST AUTHORS ADDRESS
;

_publ_section_title
;
     ENTER SECTION TITLE
;

_publ_section_title_footnote          ' ENTER ANY FOOTNOTES TO TITLE '

_publ_section_abstract
;
     ENTER ABSTRACT
;

_publ_section_exptl_refinement
;
     ENTER EXPERIMENTAL SECTION
;

_publ_section_comment
;
     ENTER TEXT
;

_publ_section_references
;
     ENTER OTHER REFERENCES

Molecular Structure Corporation. (1992-1997). teXsan.
Single Crystal Structure Analysis Software. Version 1.7.
MSC, 3200 Research Forest Drive, The Woodlands, TX 77381, USA.

Walker, N. & Stuart. D. (1983). Acta Cryst. A39, 158-166.

Zachariasen, W. H. (1967). Acta Cryst. 23, 558-564.

Altomare, A., Cascarano, M.,
Giacovazzo, C., Guagliardi, A. (1993).
J. Appl. Cryst., 26, 343.
;

_publ_section_acknowledgements
;
     ENTER ACKNOWLEDGEMENTS
;

_publ_section_table_legends
;
     ENTER TABLE LEGENDS
;

_publ_section_figure_captions
;
     ENTER FIGURE CAPTIONS
;
#------------------------------------------------------------------------------
_computing_data_collection            'MSC/AFC Diffractometer Control'
_computing_cell_refinement            'MSC/AFC Diffractometer Control'
_computing_data_reduction             'teXsan (MSC, 1992-1997)'
_computing_structure_solution
;
SIR92 (Altomare, et. al. 1993)
;
_computing_structure_refinement       'teXsan (MSC, 1992-1997)'
_computing_publication_material       'teXsan (MSC, 1992-1997)'
#------------------------------------------------------------------------------
_cell_length_a                         44.897(5)
_cell_length_b                         14.590(2)
_cell_length_c                         10.208(2)
_cell_angle_alpha                      89
_cell_angle_beta                       89
_cell_angle_gamma                      90
_cell_volume                           6687(2)
_cell_formula_units_Z                  8
_cell_measurement_temperature          296.2
_cell_measurement_reflns_used          15
_cell_measurement_theta_min            2.2
_cell_measurement_theta_max            3.5
#------------------------------------------------------------------------------
_symmetry_cell_setting                 orthorhombic
_symmetry_space_group_name_H-M        'P n a 21   '
_symmetry_Int_Tables_number            33
_symmetry_space_group_name_Hall        ?
loop_
_symmetry_equiv_pos_as_xyz
   '   +x,   +y,   +z'
   '   -x,   -y,1/2+z'
   '1/2-x,1/2+y,1/2+z'
   '1/2+x,1/2-y,   +z'
#------------------------------------------------------------------------------

_publ_section_exptl_prep
;
     ENTER EXPERIMENTAL SECTION
;
_exptl_crystal_description            '----------'
_exptl_crystal_colour                 '--------------------'
_exptl_crystal_size_max                0.00
_exptl_crystal_size_mid                0.00
_exptl_crystal_size_min                0.00
_exptl_crystal_density_diffrn          2.524
_exptl_crystal_density_meas            'not measured'
_chemical_formula_weight               1270.76
_chemical_formula_analytical           ?
_chemical_formula_sum                  'C24 H11 O15 P Pt Ru5 '
_chemical_formula_moiety               '?'
_chemical_formula_structural           ?
_chemical_compound_source              ?
_exptl_crystal_F_000                   4704.00
_exptl_absorpt_coefficient_mu          6.466
_exptl_absorpt_correction_type
;
\DF (DIFABS; Walker & Stuart, 1983)
;
_exptl_absorpt_correction_T_max        1.000
_exptl_absorpt_correction_T_min        0.347
_exptl_special_details
;
The scan width was (1.60+0.35tan\q)\% with an \w
scan speed of 4\% per minute
(up to 2 scans to achieve I/\s(I) > 10).
Stationary background counts were recorded at each end of the
scan, and the scan time:background time ratio was 2:1.
;
#------------------------------------------------------------------------------
_diffrn_special_details
;
  ?
;
_diffrn_ambient_temperature            296.2
_diffrn_radiation_wavelength           0.7107
_diffrn_radiation_type                 'Mo K\a'
_diffrn_radiation_source              'X-ray tube'
_diffrn_radiation_monochromator        graphite
_diffrn_radiation_detector            'scintillation counter'
_diffrn_measurement_device_type       'Rigaku AFC6S'
_diffrn_measurement_method            \w-2\q

_diffrn_standards_number              3
_diffrn_standards_interval_count      150
_diffrn_standards_decay_%             18.31
loop_
_diffrn_standard_refln_index_h
_diffrn_standard_refln_index_k
_diffrn_standard_refln_index_l
      -4       0     -1
       0       1      1
      -4      -1      0
_diffrn_reflns_number                  4662
_reflns_number_total                   4662
_reflns_number_gt                      3203
_reflns_threshold_expression            I>3.00\s(I)
_diffrn_reflns_av_R_equivalents        0.00000
_diffrn_reflns_av_sigmaI/netI          0.050
_diffrn_reflns_limit_h_min             0
_diffrn_reflns_limit_h_max             47
_diffrn_reflns_limit_k_min             0
_diffrn_reflns_limit_k_max             15
_diffrn_reflns_limit_l_min             -10
_diffrn_reflns_limit_l_max             0
_diffrn_reflns_theta_min               0.46
_diffrn_reflns_theta_max               22.00
_diffrn_reflns_reduction_process      'Lp corrections applied'
_diffrn_orient_matrix_UB_11           -0.01670
_diffrn_orient_matrix_UB_12            0.04551
_diffrn_orient_matrix_UB_13           -0.00512
_diffrn_orient_matrix_UB_21           -0.01483
_diffrn_orient_matrix_UB_22           -0.05110
_diffrn_orient_matrix_UB_23            0.00598
_diffrn_orient_matrix_UB_31            0.00002
_diffrn_orient_matrix_UB_32            0.00543
_diffrn_orient_matrix_UB_33            0.09750
#------------------------------------------------------------------------------
loop_
_atom_type_symbol
_atom_type_oxidation_number
_atom_type_number_in_cell
_atom_type_scat_dispersion_real
_atom_type_scat_dispersion_imag
_atom_type_scat_source
   Pt 0     8 -2.352 8.388
;International Tables for Crystallography
(1992, Vol. C, Tables 4.2.6.8 and 6.1.1.1)
;
   Ru 0    40 -1.420 0.836
;International Tables for Crystallography
(1992, Vol. C, Tables 4.2.6.8 and 6.1.1.1)
;
   P  0     8 0.090 0.095
;International Tables for Crystallography
(1992, Vol. C, Tables 4.2.6.8 and 6.1.1.1)
;
   O  0   120 0.008 0.006
;International Tables for Crystallography
(1992, Vol. C, Tables 4.2.6.8 and 6.1.1.1)
;
   C  0   192 0.002 0.002
;International Tables for Crystallography
(1992, Vol. C, Tables 4.2.6.8 and 6.1.1.1)
;
   H  0    88 0.000 0.000
;International Tables for Crystallography
(1992, Vol. C, Table 6.1.1.2)
;
#------------------------------------------------------------------------------
loop_
_atom_site_label
_atom_site_fract_x
_atom_site_fract_y
_atom_site_fract_z
_atom_site_U_iso_or_equiv
_atom_site_occupancy
_atom_site_refinement_flags
_atom_site_adp_type
_atom_site_calc_flag
_atom_site_calc_attached_atom
Pt(1) -0.91503(2) -0.18354(9) -1.62(1) 0.0546(3) 1.000 . Uani d ?
Pt(2) -0.81984(2) -0.63724(8) -1.02(1) 0.0573(4) 1.000 . Uani d ?
Ru(1) -0.99272(5) -0.3338(2) -1.62(1) 0.0636(8) 1.000 . Uani d ?
Ru(2) -0.95146(6) -0.2889(2) -1.42(1) 0.0574(8) 1.000 . Uani d ?
Ru(3) -0.92746(5) -0.3678(2) -1.66(1) 0.0548(8) 1.000 . Uani d ?
Ru(4) -0.96183(6) -0.2349(2) -1.81(1) 0.0581(8) 1.000 . Uani d ?
Ru(5) -0.97677(5) -0.1427(2) -1.57(1) 0.0548(7) 1.000 . Uani d ?
Ru(6) -0.77310(6) -0.4273(2) -1.20(1) 0.0637(8) 1.000 . Uani d ?
Ru(7) -0.80809(6) -0.4419(2) -0.97(1) 0.0580(8) 1.000 . Uani d ?
Ru(8) -0.83353(7) -0.4958(2) -1.22(1) 0.0710(9) 1.000 . Uani d ?
Ru(9) -0.78314(7) -0.6105(2) -1.28(1) 0.0714(9) 1.000 . Uani d ?
Ru(10) -0.76138(5) -0.5798(2) -1.01(1) 0.0588(8) 1.000 . Uani d ?
P(1) -0.8782(2) -0.0783(6) -1.61(1) 0.065(3) 1.000 . Uani d ?
P(2) -0.8540(2) -0.7371(6) -0.94(1) 0.071(3) 1.000 . Uani d ?
O(11) -0.9809(8) -0.537(2) -1.63(1) 0.15(1) 1.000 . Uiso d ?
O(12) -1.0375(8) -0.371(3) -1.40(1) 0.14(1) 1.000 . Uiso d ?
O(13) -1.043(1) -0.320(3) -1.83(1) 0.20(1) 1.000 . Uiso d ?
O(21) -0.9436(6) -0.475(2) -1.29(1) 0.118(9) 1.000 . Uiso d ?
O(22) -0.9964(7) -0.229(2) -1.21(1) 0.12(1) 1.000 . Uiso d ?
O(23) -0.8987(7) -0.206(2) -1.28(1) 0.12(1) 1.000 . Uiso d ?
O(31) -0.9119(6) -0.475(2) -1.90(1) 0.105(9) 1.000 . Uiso d ?
O(32) -0.8990(5) -0.522(2) -1.50(1) 0.079(7) 1.000 . Uiso d ?
O(33) -0.8631(5) -0.301(2) -1.69(1) 0.073(6) 1.000 . Uiso d ?
O(41) -1.0110(6) -0.132(2) -1.95(1) 0.117(9) 1.000 . Uiso d ?
O(42) -0.9645(7) -0.382(2) -2.03(1) 0.13(1) 1.000 . Uiso d ?
O(43) -0.9141(8) -0.128(3) -1.96(1) 0.16(1) 1.000 . Uiso d ?
O(51) -1.0408(6) -0.134(2) -1.47(1) 0.100(8) 1.000 . Uiso d ?
O(52) -0.9879(6) 0.022(2) -1.74(1) 0.105(9) 1.000 . Uiso d ?
O(53) -0.9469(5) -0.022(2) -1.36(1) 0.087(7) 1.000 . Uiso d ?
O(61) -0.7500(6) -0.417(2) -1.48(1) 0.102(8) 1.000 . Uiso d ?
O(62) -0.7875(8) -0.221(3) -1.19(1) 0.14(1) 1.000 . Uiso d ?
O(63) -0.7099(6) -0.409(2) -1.10(1) 0.120(9) 1.000 . Uiso d ?
O(71) -0.8417(7) -0.258(2) -0.98(1) 0.14(1) 1.000 . Uiso d ?
O(72) -0.7670(7) -0.360(2) -0.78(1) 0.13(1) 1.000 . Uiso d ?
O(73) -0.8516(6) -0.518(2) -0.77(1) 0.096(8) 1.000 . Uiso d ?
O(81) -0.8330(9) -0.402(3) -1.47(1) 0.17(1) 1.000 . Uiso d ?
O(82) -0.8860(7) -0.375(2) -1.14(1) 0.14(1) 1.000 . Uiso d ?
O(83) -0.8775(8) -0.650(3) -1.26(1) 0.17(1) 1.000 . Uiso d ?
O(91) -0.7947(8) -0.592(3) -1.57(1) 0.17(1) 1.000 . Uiso d ?
O(92) -0.7204(7) -0.651(2) -1.36(1) 0.119(9) 1.000 . Uiso d ?
O(93) -0.8043(7) -0.819(3) -1.28(1) 0.14(1) 1.000 . Uiso d ?
O(101) -0.7297(8) -0.530(3) -0.77(1) 0.15(1) 1.000 . Uiso d ?
O(102) -0.7114(7) -0.709(2) -1.06(1) 0.116(9) 1.000 . Uiso d ?
O(103) -0.7805(5) -0.735(2) -0.84(1) 0.085(7) 1.000 . Uiso d ?
C(1) -0.9538(5) -0.257(2) -1.61(1) 0.034(6) 1.000 . Uiso d ?
C(2) -0.7968(6) -0.532(2) -1.11(1) 0.061(8) 1.000 . Uiso d ?
C(11) -0.9869(9) -0.460(3) -1.66(1) 0.10(1) 1.000 . Uiso d ?
C(12) -1.017(1) -0.360(4) -1.48(1) 0.14(1) 1.000 . Uiso d ?
C(13) -1.0262(9) -0.322(3) -1.74(1) 0.10(1) 1.000 . Uiso d ?
C(21) -0.9448(7) -0.402(2) -1.34(1) 0.074(9) 1.000 . Uiso d ?
C(22) -0.9786(9) -0.252(3) -1.29(1) 0.10(1) 1.000 . Uiso d ?
C(23) -0.9200(9) -0.236(3) -1.33(1) 0.10(1) 1.000 . Uiso d ?
C(31) -0.917(1) -0.435(3) -1.80(1) 0.12(1) 1.000 . Uiso d ?
C(32) -0.9109(9) -0.464(3) -1.56(1) 0.11(1) 1.000 . Uiso d ?
C(33) -0.8888(6) -0.290(2) -1.67(1) 0.054(8) 1.000 . Uiso d ?
C(41) -0.9926(9) -0.174(3) -1.88(1) 0.10(1) 1.000 . Uiso d ?
C(42) -0.961(1) -0.326(3) -1.94(1) 0.12(1) 1.000 . Uiso d ?
C(43) -0.935(1) -0.163(4) -1.88(1) 0.15(1) 1.000 . Uiso d ?
C(51) -1.0164(7) -0.144(2) -1.52(1) 0.074(9) 1.000 . Uiso d ?
C(52) -0.9826(9) -0.044(3) -1.67(1) 0.10(1) 1.000 . Uiso d ?
C(53) -0.9593(6) -0.069(2) -1.44(1) 0.060(8) 1.000 . Uiso d ?
C(61) -0.7626(8) -0.418(3) -1.38(1) 0.09(1) 1.000 . Uiso d ?
C(62) -0.780(1) -0.298(3) -1.20(1) 0.11(1) 1.000 . Uiso d ?
C(63) -0.7371(9) -0.419(3) -1.14(1) 0.10(1) 1.000 . Uiso d ?
C(71) -0.8280(8) -0.332(3) -0.98(1) 0.09(1) 1.000 . Uiso d ?
C(72) -0.7837(8) -0.399(3) -0.83(1) 0.075(9) 1.000 . Uiso d ?
C(73) -0.8335(8) -0.492(3) -0.85(1) 0.076(9) 1.000 . Uiso d ?
C(81) -0.832(1) -0.435(4) -1.37(1) 0.12(1) 1.000 . Uiso d ?
C(82) -0.8673(9) -0.427(3) -1.15(1) 0.10(1) 1.000 . Uiso d ?
C(83) -0.860(1) -0.595(4) -1.24(1) 0.12(1) 1.000 . Uiso d ?
C(91) -0.810(2) -0.598(7) -1.47(2) 0.255(6) 1.000 . Uiso d ?
C(92) -0.7446(8) -0.638(2) -1.32(1) 0.076(9) 1.000 . Uiso d ?
C(93) -0.798(1) -0.737(4) -1.27(1) 0.14(1) 1.000 . Uiso d ?
C(101) -0.7421(9) -0.544(3) -0.87(1) 0.10(1) 1.000 . Uiso d ?
C(102) -0.7313(7) -0.662(2) -1.05(1) 0.076(9) 1.000 . Uiso d ?
C(103) -0.7830(8) -0.674(3) -0.92(1) 0.09(1) 1.000 . Uiso d ?
C(111) -0.8556(8) -0.069(3) -1.76(1) 0.09(1) 1.000 . Uiso d ?
C(112) -0.8524(7) -0.096(2) -1.48(1) 0.074(9) 1.000 . Uiso d ?
C(113) -0.8940(8) 0.037(2) -1.57(1) 0.08(1) 1.000 . Uiso d ?
C(114) -0.9151(8) 0.070(3) -1.67(1) 0.10(1) 1.000 . Uiso d ?
C(115) -0.929(1) 0.158(3) -1.65(1) 0.12(1) 1.000 . Uiso d ?
C(116) -0.917(1) 0.204(3) -1.53(1) 0.12(1) 1.000 . Uiso d ?
C(117) -0.895(1) 0.178(4) -1.45(1) 0.15(1) 1.000 . Uiso d ?
C(118) -0.883(1) 0.092(3) -1.48(1) 0.11(1) 1.000 . Uiso d ?
C(121) -0.8915(8) -0.697(3) -0.95(1) 0.09(1) 1.000 . Uiso d ?
C(122) -0.8512(9) -0.767(3) -0.77(1) 0.10(1) 1.000 . Uiso d ?
C(123) -0.8559(7) -0.850(2) -1.02(1) 0.068(8) 1.000 . Uiso d ?
C(124) -0.8311(8) -0.904(3) -1.02(1) 0.09(1) 1.000 . Uiso d ?
C(125) -0.827(1) -0.990(3) -1.07(1) 0.13(1) 1.000 . Uiso d ?
C(126) -0.851(1) -1.019(3) -1.12(1) 0.11(1) 1.000 . Uiso d ?
C(127) -0.878(1) -0.973(3) -1.11(1) 0.12(1) 1.000 . Uiso d ?
C(128) -0.8803(8) -0.887(3) -1.08(1) 0.08(1) 1.000 . Uiso d ?
H(1) -0.8441 -0.1241 -1.7804 0.108 1.000 . Uiso c ?
H(2) -0.8677 -0.0601 -1.8436 0.108 1.000 . Uiso c ?
H(3) -0.8420 -0.0187 -1.7610 0.108 1.000 . Uiso c ?
H(4) -0.8630 -0.0948 -1.4123 0.092 1.000 . Uiso c ?
H(5) -0.8428 -0.1525 -1.5042 0.092 1.000 . Uiso c ?
H(6) -0.8382 -0.0472 -1.4936 0.092 1.000 . Uiso c ?
H(7) -0.9197 0.0354 -1.7586 0.112 1.000 . Uiso c ?
H(8) -0.9455 0.1860 -1.7106 0.156 1.000 . Uiso c ?
H(9) -0.9236 0.2616 -1.5089 0.136 1.000 . Uiso c ?
H(10) -0.8866 0.2088 -1.3874 0.220 1.000 . Uiso c ?
H(11) -0.8664 0.0701 -1.4393 0.128 1.000 . Uiso c ?
H(12) -0.8936 -0.6388 -0.9279 0.107 1.000 . Uiso c ?
H(13) -0.8980 -0.6954 -1.0550 0.107 1.000 . Uiso c ?
H(14) -0.9047 -0.7396 -0.9200 0.107 1.000 . Uiso c ?
H(15) -0.8654 -0.8124 -0.7583 0.123 1.000 . Uiso c ?
H(16) -0.8317 -0.7879 -0.7601 0.123 1.000 . Uiso c ?
H(17) -0.8552 -0.7129 -0.7282 0.123 1.000 . Uiso c ?
H(18) -0.8139 -0.8810 -0.9860 0.116 1.000 . Uiso c ?
H(19) -0.8094 -1.0251 -1.0846 0.146 1.000 . Uiso c ?
H(20) -0.8520 -1.0754 -1.1765 0.141 1.000 . Uiso c ?
H(21) -0.8960 -1.0065 -1.1256 0.136 1.000 . Uiso c ?
H(22) -0.8971 -0.8512 -1.1143 0.103 1.000 . Uiso c ?

loop_
_atom_site_aniso_label
_atom_site_aniso_U_11
_atom_site_aniso_U_22
_atom_site_aniso_U_33
_atom_site_aniso_U_12
_atom_site_aniso_U_13
_atom_site_aniso_U_23
  Pt(1)  0.0531(6)   0.0566(7)   0.0541(8)   -0.0018(6)  0.0038(6)   -0.0020(7)
  Pt(2)  0.0484(6)   0.0542(7)   0.0691(9)   -0.0020(6)  -0.0014(6)  0.0073(8)
  Ru(1)  0.060(1)    0.064(2)    0.067(2)    -0.010(1)   -0.002(1)   0.003(2)
  Ru(2)  0.070(2)    0.061(2)    0.041(2)    0.003(1)    -0.002(1)   0.005(1)
  Ru(3)  0.061(1)    0.050(1)    0.053(2)    0.005(1)    0.001(1)    -0.002(1)
  Ru(4)  0.068(2)    0.066(2)    0.040(2)    0.001(1)    -0.007(1)   0.002(1)
  Ru(5)  0.057(1)    0.055(1)    0.052(2)    0.005(1)    0.001(1)    0.002(1)
  Ru(6)  0.069(2)    0.063(2)    0.059(2)    -0.013(1)   -0.001(1)   0.004(2)
  Ru(7)  0.060(1)    0.051(1)    0.063(2)    0.000(1)    0.003(1)    -0.002(1)
  Ru(8)  0.072(2)    0.070(2)    0.071(2)    -0.010(2)   -0.028(2)   0.014(2)
  Ru(9)  0.088(2)    0.068(2)    0.058(2)    -0.010(2)   0.007(2)    -0.007(2)
  Ru(10) 0.050(1)    0.060(2)    0.067(2)    -0.002(1)   -0.006(1)   0.003(2)
  P(1)   0.054(4)    0.070(5)    0.071(6)    -0.014(3)   -0.006(4)   -0.001(5)
  P(2)   0.042(4)    0.055(5)    0.116(9)    -0.007(3)   0.012(5)    -0.002(5)
#------------------------------------------------------------------------------
_refine_special_details
;
  ?
;
_refine_ls_structure_factor_coef       F
_refine_ls_matrix_type                 full
_refine_ls_weighting_scheme            'w = 1/[\s^2^(Fo) + 0.00160|Fo|^2^]'
_refine_ls_hydrogen_treatment          noref
_refine_ls_extinction_method           'Zachariasen (1967)'
_refine_ls_extinction_coef             0.00000034(2)
_refine_ls_extinction_expression       'equ(3) Acta Cryst.(1968) A24, p213.'
_refine_ls_abs_structure_details       ?
_refine_ls_abs_structure_Flack         ?
_refine_ls_number_reflns               3203
_refine_ls_number_parameters           440
_refine_ls_number_restraints           0
_refine_ls_number_constraints          0
_refine_ls_R_factor_all                0.0581
_refine_ls_R_factor_gt                 0.0581
_refine_ls_wR_factor_all               0.0798
_refine_ls_wR_factor_ref               0.0798
_refine_ls_goodness_of_fit_all         1.668
_refine_ls_goodness_of_fit_ref         1.668
_refine_ls_shift/esd_max               0.0706
_refine_ls_shift/esd_mean              0.0000
_refine_diff_density_min               -1.17
_refine_diff_density_max               1.36
#------------------------------------------------------------------------------
_geom_special_details
;
  ?
;
loop_
_geom_bond_atom_site_label_1
_geom_bond_atom_site_label_2
_geom_bond_distance
_geom_bond_site_symmetry_1
_geom_bond_site_symmetry_2
_geom_bond_publ_flag
  Pt(1) Ru(2) 3.058(4) . . yes
  Pt(1) Ru(3) 2.773(4) . . yes
  Pt(1) Ru(4) 2.949(4) . . yes
  Pt(1) Ru(5) 2.888(3) . . yes
  Pt(1) P(1) 2.26(1) . . yes
  Pt(1) C(1) 2.04(3) . . yes
  Pt(1) C(33) 2.00(4) . . yes
  Pt(2) Ru(7) 2.951(4) . . yes
  Pt(2) Ru(8) 2.930(4) . . yes
  Pt(2) Ru(10) 2.758(3) . . yes
  Pt(2) P(2) 2.27(1) . . yes
  Pt(2) C(2) 2.05(4) . . yes
  Pt(2) C(103) 2.01(5) . . yes
  Ru(1) Ru(2) 2.819(5) . . yes
  Ru(1) Ru(4) 2.819(5) . . yes
  Ru(1) Ru(5) 2.920(5) . . yes
  Ru(1) C(1) 2.08(3) . . yes
  Ru(1) C(11) 1.92(5) . . yes
  Ru(1) C(12) 1.86(8) . . yes
  Ru(1) C(13) 1.94(6) . . yes
  Ru(2) Ru(3) 2.923(5) . . yes
  Ru(2) Ru(5) 2.862(5) . . yes
  Ru(2) C(1) 2.05(4) . . yes
  Ru(2) C(21) 1.85(5) . . yes
  Ru(2) C(22) 1.88(6) . . yes
  Ru(2) C(23) 1.83(6) . . yes
  Ru(3) Ru(4) 2.921(4) . . yes
  Ru(3) C(1) 2.06(3) . . yes
  Ru(3) C(31) 1.79(7) . . yes
  Ru(3) C(32) 1.90(6) . . yes
  Ru(3) C(33) 2.08(4) . . yes
  Ru(4) Ru(5) 2.895(5) . . yes
  Ru(4) C(1) 2.07(4) . . yes
  Ru(4) C(41) 1.79(6) . . yes
  Ru(4) C(42) 1.89(7) . . yes
  Ru(4) C(43) 1.76(8) . . yes
  Ru(5) C(1) 2.01(3) . . yes
  Ru(5) C(51) 1.86(4) . . yes
  Ru(5) C(52) 1.80(6) . . yes
  Ru(5) C(53) 1.85(4) . . yes
  Ru(6) Ru(7) 2.823(5) . . yes
  Ru(6) Ru(8) 2.899(5) . . yes
  Ru(6) Ru(9) 2.824(5) . . yes
  Ru(6) Ru(10) 2.979(5) . . yes
  Ru(6) C(2) 2.07(4) . . yes
  Ru(6) C(61) 1.89(6) . . yes
  Ru(6) C(62) 1.92(6) . . yes
  Ru(6) C(63) 1.74(6) . . yes
  Ru(7) Ru(8) 2.895(5) . . yes
  Ru(7) Ru(10) 2.937(5) . . yes
  Ru(7) C(2) 2.02(4) . . yes
  Ru(7) C(71) 1.84(5) . . yes
  Ru(7) C(72) 1.87(5) . . yes
  Ru(7) C(73) 1.85(5) . . yes
  Ru(8) Ru(9) 2.875(6) . . yes
  Ru(8) C(2) 2.05(4) . . yes
  Ru(8) C(81) 1.76(8) . . yes
  Ru(8) C(82) 1.95(6) . . yes
  Ru(8) C(83) 1.91(7) . . yes
  Ru(9) Ru(10) 2.907(6) . . yes
  Ru(9) C(2) 2.13(5) . . yes
  Ru(9) C(91) 2.3(1) . . yes
  Ru(9) C(92) 1.84(4) . . yes
  Ru(9) C(93) 1.96(8) . . yes
  Ru(10) C(2) 2.01(4) . . yes
  Ru(10) C(101) 1.77(6) . . yes
  Ru(10) C(102) 1.85(5) . . yes
  Ru(10) C(103) 1.90(5) . . yes
  P(1) C(111) 1.82(5) . . yes
  P(1) C(112) 1.78(5) . . yes
  P(1) C(113) 1.88(5) . . yes
  P(2) C(121) 1.79(5) . . yes
  P(2) C(122) 1.86(6) . . yes
  P(2) C(123) 1.82(4) . . yes
  O(11) C(11) 1.20(6) . . yes
  O(12) C(12) 1.24(8) . . yes
  O(13) C(13) 1.19(8) . . yes
  O(21) C(21) 1.21(5) . . yes
  O(22) C(22) 1.21(6) . . yes
  O(23) C(23) 1.19(6) . . yes
  O(31) C(31) 1.23(7) . . yes
  O(32) C(32) 1.16(6) . . yes
  O(33) C(33) 1.19(4) . . yes
  O(41) C(41) 1.23(6) . . yes
  O(42) C(42) 1.18(7) . . yes
  O(43) C(43) 1.31(8) . . yes
  O(51) C(51) 1.21(5) . . yes
  O(52) C(52) 1.22(6) . . yes
  O(53) C(53) 1.21(5) . . yes
  O(61) C(61) 1.22(6) . . yes
  O(62) C(62) 1.17(6) . . yes
  O(63) C(63) 1.29(6) . . yes
  O(71) C(71) 1.25(6) . . yes
  O(72) C(72) 1.10(5) . . yes
  O(73) C(73) 1.21(5) . . yes
  O(81) C(81) 1.16(9) . . yes
  O(82) C(82) 1.13(6) . . yes
  O(83) C(83) 1.12(7) . . yes
  O(91) C(91) 1.2(1) . . yes
  O(92) C(92) 1.18(5) . . yes
  O(93) C(93) 1.24(8) . . yes
  O(101) C(101) 1.19(7) . . yes
  O(102) C(102) 1.13(5) . . yes
  O(103) C(103) 1.27(6) . . yes
  C(111) H(1) 0.98 . . no
  C(111) H(2) 1.03 . . no
  C(111) H(3) 0.95 . . no
  C(112) H(4) 0.86 . . no
  C(112) H(5) 0.96 . . no
  C(112) H(6) 0.96 . . no
  C(113) C(114) 1.49(7) . . yes
  C(113) C(118) 1.34(7) . . yes
  C(114) C(115) 1.45(7) . . yes
  C(114) H(7) 1.05 . . no
  C(115) C(116) 1.54(9) . . yes
  C(115) H(8) 1.03 . . no
  C(116) C(117) 1.29(9) . . yes
  C(116) H(9) 0.91 . . no
  C(117) C(118) 1.38(8) . . yes
  C(117) H(10) 0.89 . . no
  C(118) H(11) 0.89 . . no
  C(121) H(12) 0.89 . . no
  C(121) H(13) 1.08 . . no
  C(121) H(14) 0.93 . . no
  C(122) H(15) 0.93 . . no
  C(122) H(16) 0.93 . . no
  C(122) H(17) 0.90 . . no
  C(123) C(124) 1.37(6) . . yes
  C(123) C(128) 1.37(6) . . yes
  C(124) C(125) 1.37(8) . . yes
  C(124) H(18) 0.92 . . no
  C(125) C(126) 1.25(7) . . yes
  C(125) H(19) 0.95 . . no
  C(126) C(127) 1.38(7) . . yes
  C(126) H(20) 1.02 . . no
  C(127) C(128) 1.29(7) . . yes
  C(127) H(21) 0.96 . . no
  C(128) H(22) 0.98 . . no
#------------------------------------------------------------------------------
loop_
_geom_angle_atom_site_label_1
_geom_angle_atom_site_label_2
_geom_angle_atom_site_label_3
_geom_angle
_geom_angle_site_symmetry_1
_geom_angle_site_symmetry_2
_geom_angle_site_symmetry_3
_geom_angle_publ_flag
  Ru(2) Pt(1)  Ru(3) 59.9(1) . . . yes
  Ru(2) Pt(1)  Ru(4) 86.3(1) . . . yes
  Ru(2) Pt(1)  Ru(5) 57.5(1) . . . yes
  Ru(2) Pt(1)  P(1) 134.3(4) . . . yes
  Ru(2) Pt(1)  C(1) 42(1) . . . yes
  Ru(2) Pt(1)  C(33) 95(1) . . . yes
  Ru(3) Pt(1)  Ru(4) 61.3(1) . . . yes
  Ru(3) Pt(1)  Ru(5) 91.9(1) . . . yes
  Ru(3) Pt(1)  P(1) 144.5(3) . . . yes
  Ru(3) Pt(1)  C(1) 47.8(9) . . . yes
  Ru(3) Pt(1)  C(33) 48(1) . . . yes
  Ru(4) Pt(1)  Ru(5) 59.5(1) . . . yes
  Ru(4) Pt(1)  P(1) 136.7(4) . . . yes
  Ru(4) Pt(1)  C(1) 45(1) . . . yes
  Ru(4) Pt(1)  C(33) 94(1) . . . yes
  Ru(5) Pt(1)  P(1) 123.5(3) . . . yes
  Ru(5) Pt(1)  C(1) 44.1(9) . . . yes
  Ru(5) Pt(1)  C(33) 140(1) . . . yes
  P(1) Pt(1)  C(1) 167.4(9) . . . yes
  P(1) Pt(1)  C(33) 96(1) . . . yes
  C(1) Pt(1)  C(33) 96(1) . . . yes
  Ru(7) Pt(2)  Ru(8) 59.0(1) . . . yes
  Ru(7) Pt(2)  Ru(10) 61.8(1) . . . yes
  Ru(7) Pt(2)  P(2) 132.5(3) . . . yes
  Ru(7) Pt(2)  C(2) 43(1) . . . yes
  Ru(7) Pt(2)  C(103) 91(2) . . . yes
  Ru(8) Pt(2)  Ru(10) 91.0(1) . . . yes
  Ru(8) Pt(2)  P(2) 123.6(3) . . . yes
  Ru(8) Pt(2)  C(2) 44(1) . . . yes
  Ru(8) Pt(2)  C(103) 135(2) . . . yes
  Ru(10) Pt(2)  P(2) 145.4(4) . . . yes
  Ru(10) Pt(2)  C(2) 47(1) . . . yes
  Ru(10) Pt(2)  C(103) 44(2) . . . yes
  P(2) Pt(2)  C(2) 168(1) . . . yes
  P(2) Pt(2)  C(103) 102(2) . . . yes
  C(2) Pt(2)  C(103) 90(2) . . . yes
  Ru(2) Ru(1)  Ru(4) 93.6(1) . . . yes
  Ru(2) Ru(1)  Ru(5) 59.8(1) . . . yes
  Ru(2) Ru(1)  C(1) 46(1) . . . yes
  Ru(2) Ru(1)  C(11) 108(2) . . . yes
  Ru(2) Ru(1)  C(12) 83(2) . . . yes
  Ru(2) Ru(1)  C(13) 160(2) . . . yes
  Ru(4) Ru(1)  Ru(5) 60.6(1) . . . yes
  Ru(4) Ru(1)  C(1) 47(1) . . . yes
  Ru(4) Ru(1)  C(11) 105(2) . . . yes
  Ru(4) Ru(1)  C(12) 161(2) . . . yes
  Ru(4) Ru(1)  C(13) 84(2) . . . yes
  Ru(5) Ru(1)  C(1) 43.5(9) . . . yes
  Ru(5) Ru(1)  C(11) 158(2) . . . yes
  Ru(5) Ru(1)  C(12) 102(2) . . . yes
  Ru(5) Ru(1)  C(13) 102(2) . . . yes
  C(1) Ru(1)  C(11) 114(2) . . . yes
  C(1) Ru(1)  C(12) 127(3) . . . yes
  C(1) Ru(1)  C(13) 128(2) . . . yes
  C(11) Ru(1)  C(12) 94(3) . . . yes
  C(11) Ru(1)  C(13) 92(2) . . . yes
  C(12) Ru(1)  C(13) 93(3) . . . yes
  Pt(1) Ru(2)  Ru(1) 88.9(1) . . . yes
  Pt(1) Ru(2)  Ru(3) 55.18(9) . . . yes
  Pt(1) Ru(2)  Ru(5) 58.3(1) . . . yes
  Pt(1) Ru(2)  C(1) 41.6(8) . . . yes
  Pt(1) Ru(2)  C(21) 130(1) . . . yes
  Pt(1) Ru(2)  C(22) 133(2) . . . yes
  Pt(1) Ru(2)  C(23) 73(2) . . . yes
  Ru(1) Ru(2)  Ru(3) 63.1(1) . . . yes
  Ru(1) Ru(2)  Ru(5) 61.9(1) . . . yes
  Ru(1) Ru(2)  C(1) 47.4(8) . . . yes
  Ru(1) Ru(2)  C(21) 102(1) . . . yes
  Ru(1) Ru(2)  C(22) 99(2) . . . yes
  Ru(1) Ru(2)  C(23) 161(2) . . . yes
  Ru(3) Ru(2)  Ru(5) 89.4(1) . . . yes
  Ru(3) Ru(2)  C(1) 44.9(9) . . . yes
  Ru(3) Ru(2)  C(21) 87(2) . . . yes
  Ru(3) Ru(2)  C(22) 161(2) . . . yes
  Ru(3) Ru(2)  C(23) 107(2) . . . yes
  Ru(5) Ru(2)  C(1) 44.6(9) . . . yes
  Ru(5) Ru(2)  C(21) 163(1) . . . yes
  Ru(5) Ru(2)  C(22) 85(2) . . . yes
  Ru(5) Ru(2)  C(23) 105(2) . . . yes
  C(1) Ru(2)  C(21) 128(2) . . . yes
  C(1) Ru(2)  C(22) 126(2) . . . yes
  C(1) Ru(2)  C(23) 114(2) . . . yes
  C(21) Ru(2)  C(22) 94(2) . . . yes
  C(21) Ru(2)  C(23) 93(2) . . . yes
  C(22) Ru(2)  C(23) 92(3) . . . yes
  Pt(1) Ru(3)  Ru(2) 64.9(1) . . . yes
  Pt(1) Ru(3)  Ru(4) 62.3(1) . . . yes
  Pt(1) Ru(3)  C(1) 47.2(8) . . . yes
  Pt(1) Ru(3)  C(31) 126(2) . . . yes
  Pt(1) Ru(3)  C(32) 124(2) . . . yes
  Pt(1) Ru(3)  C(33) 46(1) . . . yes
  Ru(2) Ru(3)  Ru(4) 89.4(1) . . . yes
  Ru(2) Ru(3)  C(1) 44(1) . . . yes
  Ru(2) Ru(3)  C(31) 169(2) . . . yes
  Ru(2) Ru(3)  C(32) 88(2) . . . yes
  Ru(2) Ru(3)  C(33) 97(1) . . . yes
  Ru(4) Ru(3)  C(1) 45(1) . . . yes
  Ru(4) Ru(3)  C(31) 95(2) . . . yes
  Ru(4) Ru(3)  C(32) 171(2) . . . yes
  Ru(4) Ru(3)  C(33) 93(1) . . . yes
  C(1) Ru(3)  C(31) 140(2) . . . yes
  C(1) Ru(3)  C(32) 133(2) . . . yes
  C(1) Ru(3)  C(33) 93(1) . . . yes
  C(31) Ru(3)  C(32) 86(3) . . . yes
  C(31) Ru(3)  C(33) 93(2) . . . yes
  C(32) Ru(3)  C(33) 96(2) . . . yes
  Pt(1) Ru(4)  Ru(1) 91.1(1) . . . yes
  Pt(1) Ru(4)  Ru(3) 56.38(9) . . . yes
  Pt(1) Ru(4)  Ru(5) 59.21(9) . . . yes
  Pt(1) Ru(4)  C(1) 43.9(8) . . . yes
  Pt(1) Ru(4)  C(41) 133(2) . . . yes
  Pt(1) Ru(4)  C(42) 129(2) . . . yes
  Pt(1) Ru(4)  C(43) 68(3) . . . yes
  Ru(1) Ru(4)  Ru(3) 63.1(1) . . . yes
  Ru(1) Ru(4)  Ru(5) 61.4(1) . . . yes
  Ru(1) Ru(4)  C(1) 47.3(8) . . . yes
  Ru(1) Ru(4)  C(41) 99(2) . . . yes
  Ru(1) Ru(4)  C(42) 98(2) . . . yes
  Ru(1) Ru(4)  C(43) 159(3) . . . yes
  Ru(3) Ru(4)  Ru(5) 88.8(1) . . . yes
  Ru(3) Ru(4)  C(1) 44.9(9) . . . yes
  Ru(3) Ru(4)  C(41) 161(2) . . . yes
  Ru(3) Ru(4)  C(42) 84(2) . . . yes
  Ru(3) Ru(4)  C(43) 104(2) . . . yes
  Ru(5) Ru(4)  C(1) 44.0(9) . . . yes
  Ru(5) Ru(4)  C(41) 86(2) . . . yes
  Ru(5) Ru(4)  C(42) 160(2) . . . yes
  Ru(5) Ru(4)  C(43) 103(3) . . . yes
  C(1) Ru(4)  C(41) 127(2) . . . yes
  C(1) Ru(4)  C(42) 125(2) . . . yes
  C(1) Ru(4)  C(43) 112(3) . . . yes
  C(41) Ru(4)  C(42) 94(3) . . . yes
  C(41) Ru(4)  C(43) 95(3) . . . yes
  C(42) Ru(4)  C(43) 97(3) . . . yes
  Pt(1) Ru(5)  Ru(1) 90.4(1) . . . yes
  Pt(1) Ru(5)  Ru(2) 64.3(1) . . . yes
  Pt(1) Ru(5)  Ru(4) 61.3(1) . . . yes
  Pt(1) Ru(5)  C(1) 45.0(9) . . . yes
  Pt(1) Ru(5)  C(51) 166(1) . . . yes
  Pt(1) Ru(5)  C(52) 101(2) . . . yes
  Pt(1) Ru(5)  C(53) 81(1) . . . yes
  Ru(1) Ru(5)  Ru(2) 58.3(1) . . . yes
  Ru(1) Ru(5)  Ru(4) 58.0(1) . . . yes
  Ru(1) Ru(5)  C(1) 45.4(9) . . . yes
  Ru(1) Ru(5)  C(51) 78(1) . . . yes
  Ru(1) Ru(5)  C(52) 129(2) . . . yes
  Ru(1) Ru(5)  C(53) 141(1) . . . yes
  Ru(2) Ru(5)  Ru(4) 91.1(1) . . . yes
  Ru(2) Ru(5)  C(1) 46(1) . . . yes
  Ru(2) Ru(5)  C(51) 103(2) . . . yes
  Ru(2) Ru(5)  C(52) 165(2) . . . yes
  Ru(2) Ru(5)  C(53) 84(1) . . . yes
  Ru(4) Ru(5)  C(1) 46(1) . . . yes
  Ru(4) Ru(5)  C(51) 117(2) . . . yes
  Ru(4) Ru(5)  C(52) 85(2) . . . yes
  Ru(4) Ru(5)  C(53) 140(1) . . . yes
  C(1) Ru(5)  C(51) 123(2) . . . yes
  C(1) Ru(5)  C(52) 127(2) . . . yes
  C(1) Ru(5)  C(53) 115(2) . . . yes
  C(51) Ru(5)  C(52) 92(2) . . . yes
  C(51) Ru(5)  C(53) 102(2) . . . yes
  C(52) Ru(5)  C(53) 90(2) . . . yes
  Ru(7) Ru(6)  Ru(8) 60.8(1) . . . yes
  Ru(7) Ru(6)  Ru(9) 94.1(1) . . . yes
  Ru(7) Ru(6)  Ru(10) 60.8(1) . . . yes
  Ru(7) Ru(6)  C(2) 46(1) . . . yes
  Ru(7) Ru(6)  C(61) 161(2) . . . yes
  Ru(7) Ru(6)  C(62) 89(2) . . . yes
  Ru(7) Ru(6)  C(63) 103(2) . . . yes
  Ru(8) Ru(6)  Ru(9) 60.3(1) . . . yes
  Ru(8) Ru(6)  Ru(10) 87.3(1) . . . yes
  Ru(8) Ru(6)  C(2) 45(1) . . . yes
  Ru(8) Ru(6)  C(61) 101(2) . . . yes
  Ru(8) Ru(6)  C(62) 100(2) . . . yes
  Ru(8) Ru(6)  C(63) 157(2) . . . yes
  Ru(9) Ru(6)  Ru(10) 60.1(1) . . . yes
  Ru(9) Ru(6)  C(2) 49(1) . . . yes
  Ru(9) Ru(6)  C(61) 81(2) . . . yes
  Ru(9) Ru(6)  C(62) 155(2) . . . yes
  Ru(9) Ru(6)  C(63) 109(2) . . . yes
  Ru(10) Ru(6)  C(2) 42(1) . . . yes
  Ru(10) Ru(6)  C(61) 129(2) . . . yes
  Ru(10) Ru(6)  C(62) 140(2) . . . yes
  Ru(10) Ru(6)  C(63) 70(2) . . . yes
  C(2) Ru(6)  C(61) 127(2) . . . yes
  C(2) Ru(6)  C(62) 130(2) . . . yes
  C(2) Ru(6)  C(63) 112(2) . . . yes
  C(61) Ru(6)  C(62) 88(3) . . . yes
  C(61) Ru(6)  C(63) 97(3) . . . yes
  C(62) Ru(6)  C(63) 95(3) . . . yes
  Pt(2) Ru(7)  Ru(6) 91.0(1) . . . yes
  Pt(2) Ru(7)  Ru(8) 60.2(1) . . . yes
  Pt(2) Ru(7)  Ru(10) 55.87(9) . . . yes
  Pt(2) Ru(7)  C(2) 44(1) . . . yes
  Pt(2) Ru(7)  C(71) 138(2) . . . yes
  Pt(2) Ru(7)  C(72) 125(1) . . . yes
  Pt(2) Ru(7)  C(73) 68(2) . . . yes
  Ru(6) Ru(7)  Ru(8) 60.9(1) . . . yes
  Ru(6) Ru(7)  Ru(10) 62.3(1) . . . yes
  Ru(6) Ru(7)  C(2) 47(1) . . . yes
  Ru(6) Ru(7)  C(71) 98(2) . . . yes
  Ru(6) Ru(7)  C(72) 105(2) . . . yes
  Ru(6) Ru(7)  C(73) 159(2) . . . yes
  Ru(8) Ru(7)  Ru(10) 88.2(1) . . . yes
  Ru(8) Ru(7)  C(2) 45(1) . . . yes
  Ru(8) Ru(7)  C(71) 89(2) . . . yes
  Ru(8) Ru(7)  C(72) 166(2) . . . yes
  Ru(8) Ru(7)  C(73) 104(2) . . . yes
  Ru(10) Ru(7)  C(2) 43(1) . . . yes
  Ru(10) Ru(7)  C(71) 159(2) . . . yes
  Ru(10) Ru(7)  C(72) 85(1) . . . yes
  Ru(10) Ru(7)  C(73) 105(2) . . . yes
  C(2) Ru(7)  C(71) 130(2) . . . yes
  C(2) Ru(7)  C(72) 127(2) . . . yes
  C(2) Ru(7)  C(73) 112(2) . . . yes
  C(71) Ru(7)  C(72) 93(2) . . . yes
  C(71) Ru(7)  C(73) 96(2) . . . yes
  C(72) Ru(7)  C(73) 90(2) . . . yes
  Pt(2) Ru(8)  Ru(6) 89.9(1) . . . yes
  Pt(2) Ru(8)  Ru(7) 60.9(1) . . . yes
  Pt(2) Ru(8)  Ru(9) 64.1(1) . . . yes
  Pt(2) Ru(8)  C(2) 44(1) . . . yes
  Pt(2) Ru(8)  C(81) 158(2) . . . yes
  Pt(2) Ru(8)  C(82) 106(2) . . . yes
  Pt(2) Ru(8)  C(83) 72(2) . . . yes
  Ru(6) Ru(8)  Ru(7) 58.3(1) . . . yes
  Ru(6) Ru(8)  Ru(9) 58.6(1) . . . yes
  Ru(6) Ru(8)  C(2) 45(1) . . . yes
  Ru(6) Ru(8)  C(81) 81(2) . . . yes
  Ru(6) Ru(8)  C(82) 122(2) . . . yes
  Ru(6) Ru(8)  C(83) 150(2) . . . yes
  Ru(7) Ru(8)  Ru(9) 91.5(1) . . . yes
  Ru(7) Ru(8)  C(2) 44(1) . . . yes
  Ru(7) Ru(8)  C(81) 127(2) . . . yes
  Ru(7) Ru(8)  C(82) 81(2) . . . yes
  Ru(7) Ru(8)  C(83) 125(2) . . . yes
  Ru(9) Ru(8)  C(2) 48(1) . . . yes
  Ru(9) Ru(8)  C(81) 95(2) . . . yes
  Ru(9) Ru(8)  C(82) 170(2) . . . yes
  Ru(9) Ru(8)  C(83) 92(2) . . . yes
  C(2) Ru(8)  C(81) 124(3) . . . yes
  C(2) Ru(8)  C(82) 124(2) . . . yes
  C(2) Ru(8)  C(83) 112(2) . . . yes
  C(81) Ru(8)  C(82) 95(3) . . . yes
  C(81) Ru(8)  C(83) 108(3) . . . yes
  C(82) Ru(8)  C(83) 87(2) . . . yes
  Ru(6) Ru(9)  Ru(8) 61.1(1) . . . yes
  Ru(6) Ru(9)  Ru(10) 62.6(1) . . . yes
  Ru(6) Ru(9)  C(2) 47(1) . . . yes
  Ru(6) Ru(9)  C(91) 104(3) . . . yes
  Ru(6) Ru(9)  C(92) 98(1) . . . yes
  Ru(6) Ru(9)  C(93) 160(2) . . . yes
  Ru(8) Ru(9)  Ru(10) 89.2(2) . . . yes
  Ru(8) Ru(9)  C(2) 45(1) . . . yes
  Ru(8) Ru(9)  C(91) 74(3) . . . yes
  Ru(8) Ru(9)  C(92) 157(1) . . . yes
  Ru(8) Ru(9)  C(93) 106(2) . . . yes
  Ru(10) Ru(9)  C(2) 44(1) . . . yes
  Ru(10) Ru(9)  C(91) 163(3) . . . yes
  Ru(10) Ru(9)  C(92) 88(2) . . . yes
  Ru(10) Ru(9)  C(93) 104(2) . . . yes
  C(2) Ru(9)  C(91) 119(3) . . . yes
  C(2) Ru(9)  C(92) 127(2) . . . yes
  C(2) Ru(9)  C(93) 113(3) . . . yes
  C(91) Ru(9)  C(92) 105(3) . . . yes
  C(91) Ru(9)  C(93) 85(4) . . . yes
  C(92) Ru(9)  C(93) 97(2) . . . yes
  Pt(2) Ru(10)  Ru(6) 91.7(1) . . . yes
  Pt(2) Ru(10)  Ru(7) 62.32(9) . . . yes
  Pt(2) Ru(10)  Ru(9) 65.8(1) . . . yes
  Pt(2) Ru(10)  C(2) 48(1) . . . yes
  Pt(2) Ru(10)  C(101) 126(2) . . . yes
  Pt(2) Ru(10)  C(102) 119(1) . . . yes
  Pt(2) Ru(10)  C(103) 47(2) . . . yes
  Ru(6) Ru(10)  Ru(7) 57.0(1) . . . yes
  Ru(6) Ru(10)  Ru(9) 57.3(1) . . . yes
  Ru(6) Ru(10)  C(2) 44(1) . . . yes
  Ru(6) Ru(10)  C(101) 113(2) . . . yes
  Ru(6) Ru(10)  C(102) 119(2) . . . yes
  Ru(6) Ru(10)  C(103) 138(2) . . . yes
  Ru(7) Ru(10)  Ru(9) 90.0(1) . . . yes
  Ru(7) Ru(10)  C(2) 43(1) . . . yes
  Ru(7) Ru(10)  C(101) 92(2) . . . yes
  Ru(7) Ru(10)  C(102) 176(2) . . . yes
  Ru(7) Ru(10)  C(103) 94(2) . . . yes
  Ru(9) Ru(10)  C(2) 47(1) . . . yes
  Ru(9) Ru(10)  C(101) 166(2) . . . yes
  Ru(9) Ru(10)  C(102) 87(2) . . . yes
  Ru(9) Ru(10)  C(103) 99(2) . . . yes
  C(2) Ru(10)  C(101) 134(2) . . . yes
  C(2) Ru(10)  C(102) 134(2) . . . yes
  C(2) Ru(10)  C(103) 95(2) . . . yes
  C(101) Ru(10)  C(102) 90(2) . . . yes
  C(101) Ru(10)  C(103) 95(3) . . . yes
  C(102) Ru(10)  C(103) 90(2) . . . yes
  Pt(1) P(1)  C(111) 115(2) . . . yes
  Pt(1) P(1)  C(112) 115(2) . . . yes
  Pt(1) P(1)  C(113) 110(2) . . . yes
  C(111) P(1)  C(112) 105(2) . . . yes
  C(111) P(1)  C(113) 110(2) . . . yes
  C(112) P(1)  C(113) 102(2) . . . yes
  Pt(2) P(2)  C(121) 114(2) . . . yes
  Pt(2) P(2)  C(122) 117(2) . . . yes
  Pt(2) P(2)  C(123) 117(2) . . . yes
  C(121) P(2)  C(122) 101(3) . . . yes
  C(121) P(2)  C(123) 103(2) . . . yes
  C(122) P(2)  C(123) 102(2) . . . yes
  Pt(1) C(1)  Ru(1) 176(2) . . . yes
  Pt(1) C(1)  Ru(2) 97(1) . . . yes
  Pt(1) C(1)  Ru(3) 85(1) . . . yes
  Pt(1) C(1)  Ru(4) 91(1) . . . yes
  Pt(1) C(1)  Ru(5) 91(1) . . . yes
  Ru(1) C(1)  Ru(2) 86(1) . . . yes
  Ru(1) C(1)  Ru(3) 93(1) . . . yes
  Ru(1) C(1)  Ru(4) 85(1) . . . yes
  Ru(1) C(1)  Ru(5) 91(1) . . . yes
  Ru(2) C(1)  Ru(3) 91(1) . . . yes
  Ru(2) C(1)  Ru(4) 172(2) . . . yes
  Ru(2) C(1)  Ru(5) 90(1) . . . yes
  Ru(3) C(1)  Ru(4) 90(1) . . . yes
  Ru(3) C(1)  Ru(5) 176(2) . . . yes
  Ru(4) C(1)  Ru(5) 90(1) . . . yes
  Pt(2) C(2)  Ru(6) 179(2) . . . yes
  Pt(2) C(2)  Ru(7) 93(2) . . . yes
  Pt(2) C(2)  Ru(8) 91(2) . . . yes
  Pt(2) C(2)  Ru(9) 95(2) . . . yes
  Pt(2) C(2)  Ru(10) 85(2) . . . yes
  Ru(6) C(2)  Ru(7) 87(2) . . . yes
  Ru(6) C(2)  Ru(8) 89(2) . . . yes
  Ru(6) C(2)  Ru(9) 85(2) . . . yes
  Ru(6) C(2)  Ru(10) 94(2) . . . yes
  Ru(7) C(2)  Ru(8) 91(2) . . . yes
  Ru(7) C(2)  Ru(9) 172(2) . . . yes
  Ru(7) C(2)  Ru(10) 94(2) . . . yes
  Ru(8) C(2)  Ru(9) 87(2) . . . yes
  Ru(8) C(2)  Ru(10) 175(2) . . . yes
  Ru(9) C(2)  Ru(10) 89(2) . . . yes
  Ru(1) C(11)  O(11) 150(6) . . . yes
  Ru(1) C(12)  O(12) 169(7) . . . yes
  Ru(1) C(13)  O(13) 166(6) . . . yes
  Ru(2) C(21)  O(21) 172(4) . . . yes
  Ru(2) C(22)  O(22) 179(5) . . . yes
  Ru(2) C(23)  O(23) 176(5) . . . yes
  Ru(3) C(31)  O(31) 173(6) . . . yes
  Ru(3) C(32)  O(32) 175(5) . . . yes
  Pt(1) C(33)  Ru(3) 86(1) . . . yes
  Pt(1) C(33)  O(33) 136(3) . . . yes
  Ru(3) C(33)  O(33) 138(3) . . . yes
  Ru(4) C(41)  O(41) 170(5) . . . yes
  Ru(4) C(42)  O(42) 172(6) . . . yes
  Ru(4) C(43)  O(43) 164(7) . . . yes
  Ru(5) C(51)  O(51) 169(4) . . . yes
  Ru(5) C(52)  O(52) 177(5) . . . yes
  Ru(5) C(53)  O(53) 177(3) . . . yes
  Ru(6) C(61)  O(61) 166(4) . . . yes
  Ru(6) C(62)  O(62) 173(6) . . . yes
  Ru(6) C(63)  O(63) 175(6) . . . yes
  Ru(7) C(71)  O(71) 174(5) . . . yes
  Ru(7) C(72)  O(72) 163(5) . . . yes
  Ru(7) C(73)  O(73) 174(4) . . . yes
  Ru(8) C(81)  O(81) 172(7) . . . yes
  Ru(8) C(82)  O(82) 161(6) . . . yes
  Ru(8) C(83)  O(83) 176(7) . . . yes
  Ru(9) C(91)  O(91) 116(8) . . . yes
  Ru(9) C(92)  O(92) 174(5) . . . yes
  Ru(9) C(93)  O(93) 171(6) . . . yes
  Ru(10) C(101)  O(101) 172(6) . . . yes
  Ru(10) C(102)  O(102) 172(5) . . . yes
  Pt(2) C(103)  Ru(10) 90(2) . . . yes
  Pt(2) C(103)  O(103) 128(4) . . . yes
  Ru(10) C(103)  O(103) 142(4) . . . yes
  P(1) C(111)  H(1) 114.4 . . . no
  P(1) C(111)  H(2) 113.9 . . . no
  P(1) C(111)  H(3) 115.8 . . . no
  H(1) C(111)  H(2) 101.0 . . . no
  H(1) C(111)  H(3) 106.9 . . . no
  H(2) C(111)  H(3) 103.2 . . . no
  P(1) C(112)  H(4) 104.9 . . . no
  P(1) C(112)  H(5) 104.0 . . . no
  P(1) C(112)  H(6) 103.9 . . . no
  H(4) C(112)  H(5) 116.9 . . . no
  H(4) C(112)  H(6) 117.3 . . . no
  H(5) C(112)  H(6) 108.0 . . . no
  P(1) C(113)  C(114) 111(4) . . . yes
  P(1) C(113)  C(118) 124(4) . . . yes
  C(114) C(113)  C(118) 123(5) . . . yes
  C(113) C(114)  C(115) 117(5) . . . yes
  C(113) C(114)  H(7) 124.6 . . . no
  C(115) C(114)  H(7) 117.9 . . . no
  C(114) C(115)  C(116) 110(5) . . . yes
  C(114) C(115)  H(8) 124.6 . . . no
  C(116) C(115)  H(8) 125.0 . . . no
  C(115) C(116)  C(117) 129(7) . . . yes
  C(115) C(116)  H(9) 116.0 . . . no
  C(117) C(116)  H(9) 114.7 . . . no
  C(116) C(117)  C(118) 117(8) . . . yes
  C(116) C(117)  H(10) 127.1 . . . no
  C(118) C(117)  H(10) 115.4 . . . no
  C(113) C(118)  C(117) 122(7) . . . yes
  C(113) C(118)  H(11) 112.9 . . . no
  C(117) C(118)  H(11) 125.1 . . . no
  P(2) C(121)  H(12) 113.5 . . . no
  P(2) C(121)  H(13) 108.1 . . . no
  P(2) C(121)  H(14) 111.0 . . . no
  H(12) C(121)  H(13) 103.8 . . . no
  H(12) C(121)  H(14) 117.8 . . . no
  H(13) C(121)  H(14) 101.2 . . . no
  P(2) C(122)  H(15) 102.6 . . . no
  P(2) C(122)  H(16) 102.5 . . . no
  P(2) C(122)  H(17) 102.6 . . . no
  H(15) C(122)  H(16) 113.2 . . . no
  H(15) C(122)  H(17) 116.7 . . . no
  H(16) C(122)  H(17) 116.3 . . . no
  P(2) C(123)  C(124) 119(4) . . . yes
  P(2) C(123)  C(128) 126(3) . . . yes
  C(124) C(123)  C(128) 114(4) . . . yes
  C(123) C(124)  C(125) 131(5) . . . yes
  C(123) C(124)  H(18) 117.6 . . . no
  C(125) C(124)  H(18) 111.8 . . . no
  C(124) C(125)  C(126) 109(6) . . . yes
  C(124) C(125)  H(19) 131.0 . . . no
  C(126) C(125)  H(19) 119.2 . . . no
  C(125) C(126)  C(127) 124(6) . . . yes
  C(125) C(126)  H(20) 121.4 . . . no
  C(127) C(126)  H(20) 113.7 . . . no
  C(126) C(127)  C(128) 124(6) . . . yes
  C(126) C(127)  H(21) 118.4 . . . no
  C(128) C(127)  H(21) 117.4 . . . no
  C(123) C(128)  C(127) 114(5) . . . yes
  C(123) C(128)  H(22) 124.2 . . . no
  C(127) C(128)  H(22) 120.9 . . . no
#------------------------------------------------------------------------------
loop_
_geom_contact_atom_site_label_1
_geom_contact_atom_site_label_2
_geom_contact_distance
_geom_contact_site_symmetry_1
_geom_contact_site_symmetry_2
_geom_contact_publ_flag
  O(11)     O(42)     2.93(6)    . 2_345 no
  O(11)     O(12)     3.11(8)    . 2_344 no
  O(12)     O(31)     3.19(6)    . 2_345 no
  O(12)     C(121)    3.39(6)    . 2_344 no
  O(12)     C(11)     3.59(8)    . 2_345 no
  O(13)     O(21)     3.08(7)    . 2_344 no
  O(13)     C(116)    3.21(9)    . 2_354 no
  O(21)     O(42)     3.14(7)    . 1_556 no
  O(21)     C(13)     3.30(7)    . 2_345 no
  O(21)     O(82)     3.33(6)    . . no
  O(21)     C(11)     3.50(7)    . 2_345 no
  O(22)     O(41)     3.07(6)    . 1_556 no
  O(22)     O(52)     3.13(5)    . 2_355 no
  O(22)     O(42)     3.23(6)    . 1_556 no
  O(22)     C(41)     3.41(8)    . 1_556 no
  O(22)     C(42)     3.42(8)    . 1_556 no
  O(22)     C(115)    3.54(7)    . 2_355 no
  O(23)     O(82)     2.90(6)    . . no
  O(23)     O(43)     3.55(8)    . 1_556 no
  O(31)     O(82)     3.06(6)    . 1_554 no
  O(31)     O(73)     3.11(5)    . 1_554 no
  O(31)     C(82)     3.28(7)    . 1_554 no
  O(31)     C(121)    3.40(6)    . 1_554 no
  O(31)     C(73)     3.58(6)    . 1_554 no
  O(32)     O(83)     3.25(7)    . . no
  O(32)     C(83)     3.34(8)    . . no
  O(32)     O(73)     3.45(5)    . 1_554 no
  O(32)     O(81)     3.46(6)    . . no
  O(32)     C(81)     3.56(8)    . . no
  O(33)     O(81)     3.03(7)    . . no
  O(33)     O(71)     3.14(6)    . 1_554 no
  O(33)     O(73)     3.29(4)    . 1_554 no
  O(33)     C(71)     3.38(7)    . 1_554 no
  O(33)     C(73)     3.47(6)    . 1_554 no
  O(41)     O(53)     3.07(5)    . 2_354 no
  O(41)     C(53)     3.21(6)    . 2_354 no
  O(41)     O(52)     3.40(6)    . 2_354 no
  O(41)     C(115)    3.41(8)    . 2_354 no
  O(41)     C(52)     3.44(7)    . 2_354 no
  O(41)     C(116)    3.51(7)    . 2_354 no
  O(42)     C(22)     3.35(8)    . 1_554 no
  O(42)     C(21)     3.38(7)    . 1_554 no
  O(42)     C(11)     3.47(7)    . 2_344 no
  O(43)     C(127)    3.16(8)    . 1_564 no
  O(51)     O(52)     3.13(5)    . 2_355 no
  O(51)     C(115)    3.55(8)    . 2_355 no
  O(52)     O(53)     3.18(4)    . 2_354 no
  O(52)     C(53)     3.21(5)    . 2_354 no
  O(52)     C(51)     3.35(6)    . 2_354 no
  O(61)     O(72)     3.22(6)    . 1_554 no
  O(61)     O(103)    3.34(5)    . 3_354 no
  O(61)     O(101)    3.46(7)    . 1_554 no
  O(61)     O(102)    3.58(5)    . 3_354 no
  O(62)     O(101)    3.00(7)    . 3_354 no
  O(62)     O(103)    3.40(6)    . 3_354 no
  O(62)     C(101)    3.43(8)    . 3_354 no
  O(62)     O(92)     3.51(7)    . 3_355 no
  O(63)     O(103)    3.54(6)    . 3_354 no
  O(63)     O(93)     3.58(7)    . 3_355 no
  O(71)     O(92)     3.40(6)    . 3_355 no
  O(72)     O(92)     3.23(6)    . 3_355 no
  O(72)     O(93)     3.26(6)    . 3_355 no
  O(72)     O(102)    3.29(6)    . 3_355 no
  O(72)     C(92)     3.31(6)    . 3_355 no
  O(72)     C(93)     3.44(8)    . 3_355 no
  O(73)     C(31)     3.20(7)    . 1_556 no
  O(73)     O(91)     3.43(6)    . 1_556 no
  O(73)     C(32)     3.50(7)    . 1_556 no
  O(73)     O(81)     3.57(7)    . 1_556 no
  O(81)     O(102)    3.56(7)    . 3_354 no
  O(82)     C(23)     3.21(8)    . . no
  O(82)     C(21)     3.37(7)    . . no
  O(83)     C(117)    3.3(1)     . 1_545 no
  O(91)     O(103)    3.49(7)    . 1_554 no
  O(93)     O(101)    3.43(7)    . 3_344 no
  O(101)    C(125)    3.29(8)    . 3_355 no
  O(102)    C(112)    3.40(6)    . 3_345 no
  O(103)    C(62)     3.21(7)    . 3_345 no
  O(103)    C(61)     3.32(6)    . 3_345 no
  O(103)    C(63)     3.46(7)    . 3_345 no
#------------------------------------------------------------------------------
loop_
_geom_torsion_atom_site_label_1
_geom_torsion_atom_site_label_2
_geom_torsion_atom_site_label_3
_geom_torsion_atom_site_label_4
_geom_torsion_site_symmetry_1
_geom_torsion_site_symmetry_2
_geom_torsion_site_symmetry_3
_geom_torsion_site_symmetry_4
_geom_torsion
_geom_torsion_publ_flag
        ?  ?  ?  ?   ?   ? ? ? ?  ?
# -- ENTER TORSION ANGLES HERE, ONE PER LINE --
# e.g. C1 C2 C3 C4 52.8(1) . . . . yes

#===END

Compound 3.
data_afc6s.xtl_master_file
#------------------------------------------------------------------------------
_audit_creation_date                  '1999-09-21'
_audit_creation_method                'by teXsan v1.8'
_audit_update_record
;
?
;
#------------------------------------------------------------------------------
_publ_requested_journal               ' ENTER JOURNAL NAME HERE'
_publ_requested_category              ' CHOOSE FI FM FO CI CM CO or AD'
_publ_contact_author_name             ' ENTER CONTACT NAME HERE

_publ_contact_author_address
;
    ENTER ADDRESS
;
_publ_contact_letter
;
     ENTER TEXT OF LETTER
;

_publ_requested_coeditor_name          ?
_publ_contact_author_phone            ' ENTER PHONE NUMBER '
_publ_contact_author_fax              ' ENTER FAX NUMBER '
_publ_contact_author_email            ' ENTER EMAIL ADDRESS '
loop_
_publ_author_name
_publ_author_footnote
_publ_author_address
' FIRST AUTHORS NAME '
;
   FIRST AUTHORS FOOTNOTES
;
;
   FIRST AUTHORS ADDRESS
;

_publ_section_title
;
     ENTER SECTION TITLE
;

_publ_section_title_footnote          ' ENTER ANY FOOTNOTES TO TITLE '

_publ_section_abstract
;
     ENTER ABSTRACT
;

_publ_section_exptl_refinement
;
     ENTER EXPERIMENTAL SECTION
;

_publ_section_comment
;
     ENTER TEXT
;

_publ_section_references
;
     ENTER OTHER REFERENCES

Molecular Structure Corporation. (1992-1997). teXsan.
Single Crystal Structure Analysis Software. Version 1.7.
MSC, 3200 Research Forest Drive, The Woodlands, TX 77381, USA.

Walker, N. & Stuart. D. (1983). Acta Cryst. A39, 158-166.

Zachariasen, W. H. (1967). Acta Cryst. 23, 558-564.

Altomare, A., Cascarano, M.,
Giacovazzo, C., Guagliardi, A. (1993).
J. Appl. Cryst., 26, 343.
;

_publ_section_acknowledgements
;
     ENTER ACKNOWLEDGEMENTS
;

_publ_section_table_legends
;
     ENTER TABLE LEGENDS
;

_publ_section_figure_captions
;
     ENTER FIGURE CAPTIONS
;
#------------------------------------------------------------------------------
_computing_data_collection            'MSC/AFC Diffractometer Control'
_computing_cell_refinement            'MSC/AFC Diffractometer Control'
_computing_data_reduction             'teXsan (MSC, 1992-1997)'
_computing_structure_solution
;
SIR92 (Altomare, et. al. 1993)
;
_computing_structure_refinement       'teXsan (MSC, 1992-1997)'
_computing_publication_material       'teXsan (MSC, 1992-1997)'
#------------------------------------------------------------------------------
_cell_length_a                         9.407(1)
_cell_length_b                         25.955(7)
_cell_length_c                         9.980(1)
_cell_angle_alpha                      90
_cell_angle_beta                       113.41(1)
_cell_angle_gamma                      90
_cell_volume                           2236.0(7)
_cell_formula_units_Z                  2
_cell_measurement_temperature          293.2
_cell_measurement_reflns_used          15
_cell_measurement_theta_min            2.4
_cell_measurement_theta_max            3.5
#------------------------------------------------------------------------------
_symmetry_cell_setting                 monoclinic
_symmetry_space_group_name_H-M        'P 21/m     '
_symmetry_Int_Tables_number            11
_symmetry_space_group_name_Hall        ?
loop_
_symmetry_equiv_pos_as_xyz
   '   +x,   +y,   +z'
   '   -x,1/2+y,   -z'
   '   -x,   -y,   -z'
   '   +x,1/2-y,   +z'
#------------------------------------------------------------------------------

_publ_section_exptl_prep
;
     ENTER EXPERIMENTAL SECTION
;
_exptl_crystal_description            '----------'
_exptl_crystal_colour                 '--------------------'
_exptl_crystal_size_max                0.00
_exptl_crystal_size_mid                0.00
_exptl_crystal_size_min                0.00
_exptl_crystal_density_diffrn          2.167
_exptl_crystal_density_meas            'not measured'
_chemical_formula_weight               1459.01
_chemical_formula_analytical           ?
_chemical_formula_sum                  'C37 H28 O14 P2 Pt Ru5 '
_chemical_formula_moiety               '?'
_chemical_formula_structural           ?
_chemical_compound_source              ?
_exptl_crystal_F_000                   1380.00
_exptl_absorpt_coefficient_mu          4.882
_exptl_absorpt_correction_type
;
\DF (DIFABS; Walker & Stuart, 1983)
;
_exptl_absorpt_correction_T_max        1.000
_exptl_absorpt_correction_T_min        0.451
_exptl_special_details
;
The scan width was (1.60+0.35tan\q)\% with an \w
scan speed of 4\% per minute
(up to 2 scans to achieve I/\s(I) > 10).
Stationary background counts were recorded at each end of the
scan, and the scan time:background time ratio was 2:1.
;
#------------------------------------------------------------------------------
_diffrn_special_details
;
  ?
;
_diffrn_ambient_temperature            293.2
_diffrn_radiation_wavelength           0.7107
_diffrn_radiation_type                 'Mo K\a'
_diffrn_radiation_source              'X-ray tube'
_diffrn_radiation_monochromator        graphite
_diffrn_radiation_detector            'scintillation counter'
_diffrn_measurement_device_type       'Rigaku AFC6S'
_diffrn_measurement_method            \w-2\q

_diffrn_standards_number              3
_diffrn_standards_interval_count      150
_diffrn_standards_decay_%             1.92
loop_
_diffrn_standard_refln_index_h
_diffrn_standard_refln_index_k
_diffrn_standard_refln_index_l
       1       0     -1
       1      -2     -1
      -1      -1      0
_diffrn_reflns_number                  3412
_reflns_number_total                   3197
_reflns_number_gt                      2637
_reflns_threshold_expression            I>3.00\s(I)
_diffrn_reflns_av_R_equivalents        0.01559
_diffrn_reflns_av_sigmaI/netI          0.020
_diffrn_reflns_limit_h_min             0
_diffrn_reflns_limit_h_max             10
_diffrn_reflns_limit_k_min             0
_diffrn_reflns_limit_k_max             28
_diffrn_reflns_limit_l_min             -10
_diffrn_reflns_limit_l_max             10
_diffrn_reflns_theta_min               0.79
_diffrn_reflns_theta_max               23.00
_diffrn_reflns_reduction_process      'Lp corrections applied'
_diffrn_orient_matrix_UB_11           -0.04711
_diffrn_orient_matrix_UB_12           -0.02210
_diffrn_orient_matrix_UB_13           -0.08929
_diffrn_orient_matrix_UB_21           -0.00028
_diffrn_orient_matrix_UB_22            0.03011
_diffrn_orient_matrix_UB_23           -0.06291
_diffrn_orient_matrix_UB_31            0.10586
_diffrn_orient_matrix_UB_32           -0.00972
_diffrn_orient_matrix_UB_33            0.00773
#------------------------------------------------------------------------------
loop_
_atom_type_symbol
_atom_type_oxidation_number
_atom_type_number_in_cell
_atom_type_scat_dispersion_real
_atom_type_scat_dispersion_imag
_atom_type_scat_source
   Pt 0     2 -2.352 8.388
;International Tables for Crystallography
(1992, Vol. C, Tables 4.2.6.8 and 6.1.1.1)
;
   Ru 0    10 -1.420 0.836
;International Tables for Crystallography
(1992, Vol. C, Tables 4.2.6.8 and 6.1.1.1)
;
   P  0     4 0.090 0.095
;International Tables for Crystallography
(1992, Vol. C, Tables 4.2.6.8 and 6.1.1.1)
;
   O  0    28 0.008 0.006
;International Tables for Crystallography
(1992, Vol. C, Tables 4.2.6.8 and 6.1.1.1)
;
   C  0    74 0.002 0.002
;International Tables for Crystallography
(1992, Vol. C, Tables 4.2.6.8 and 6.1.1.1)
;
   H  0    56 0.000 0.000
;International Tables for Crystallography
(1992, Vol. C, Table 6.1.1.2)
;
#------------------------------------------------------------------------------
loop_
_atom_site_label
_atom_site_fract_x
_atom_site_fract_y
_atom_site_fract_z
_atom_site_U_iso_or_equiv
_atom_site_occupancy
_atom_site_refinement_flags
_atom_site_adp_type
_atom_site_calc_flag
_atom_site_calc_attached_atom
Pt(1) -0.39119(5) 0.2500 0.58053(4) 0.0340(1) 0.500  ST Uani d ?
Ru(1) 0.05668(9) 0.2500 0.88826(8) 0.0308(2) 0.500  ST Uani d ?
Ru(2) -0.1019(1) 0.2500 0.56638(9) 0.0355(3) 0.500  ST Uani d ?
Ru(3) -0.15244(7) 0.16989(2) 0.74923(6) 0.0290(2) 1.000 . Uani d ?
Ru(4) -0.2563(1) 0.2500 0.89327(8) 0.0293(2) 0.500  ST Uani d ?
P(1) -0.3473(3) 0.11395(9) 0.6014(2) 0.0426(6) 1.000 . Uani d ?
O(10) -0.382(1) 0.2500 0.2801(9) 0.081(4) 0.500  ST Uani d ?
O(11) -0.732(1) 0.2500 0.418(1) 0.129(6) 0.500  ST Uani d ?
O(12) -0.464(1) 0.1718(4) 0.949(1) 0.155(6) 1.000 . Uani d ?
O(13) -0.035(2) 0.2500 1.206(1) 0.24(1) 0.500  ST Uani d ?
O(14) 0.2431(9) 0.1653(3) 1.0937(8) 0.096(3) 1.000 . Uani d ?
O(15) 0.284(1) 0.2500 0.745(1) 0.147(6) 0.500  ST Uani d ?
O(16) -0.1143(9) 0.1083(3) 1.0180(7) 0.079(2) 1.000 . Uani d ?
O(17) 0.1011(9) 0.1061(3) 0.7146(9) 0.086(3) 1.000 . Uani d ?
O(18) 0.000(1) 0.1644(4) 0.418(1) 0.135(4) 1.000 . Uani d ?
C(1) -0.169(1) 0.2500 0.7365(9) 0.027(3) 0.500  ST Uani d ?
C(10) -0.314(1) 0.2500 0.408(1) 0.048(4) 0.500  ST Uani d ?
C(11) -0.603(2) 0.2500 0.480(1) 0.064(5) 0.500  ST Uani d ?
C(12) -0.382(1) 0.1999(4) 0.925(1) 0.077(4) 1.000 . Uani d ?
C(13) -0.111(2) 0.2500 1.088(2) 0.113(8) 0.500  ST Uani d ?
C(14) 0.171(1) 0.1964(3) 1.0170(9) 0.051(3) 1.000 . Uani d ?
C(15) 0.178(1) 0.2500 0.777(1) 0.074(5) 0.500  ST Uani d ?
C(16) -0.134(1) 0.1317(3) 0.9144(8) 0.047(3) 1.000 . Uani d ?
C(17) 0.000(1) 0.1297(4) 0.7209(9) 0.052(3) 1.000 . Uani d ?
C(18) -0.036(1) 0.1958(4) 0.475(1) 0.070(4) 1.000 . Uani d ?
C(21) -0.418(1) 0.1221(4) 0.4073(9) 0.070(3) 1.000 . Uani d ?
C(22) -0.523(1) 0.1104(4) 0.636(1) 0.073(3) 1.000 . Uani d ?
C(31) -0.277(1) 0.0474(3) 0.6288(8) 0.045(2) 1.000 . Uani d ?
C(32) -0.209(1) 0.0250(4) 0.540(1) 0.060(3) 1.000 . Uani d ?
C(33) -0.144(1) -0.0238(4) 0.569(1) 0.071(4) 1.000 . Uani d ?
C(34) -0.145(1) -0.0507(4) 0.687(1) 0.071(4) 1.000 . Uani d ?
C(35) -0.208(1) -0.0299(5) 0.776(1) 0.074(4) 1.000 . Uani d ?
C(36) -0.274(1) 0.0188(4) 0.748(1) 0.062(3) 1.000 . Uani d ?
C(41) 0.429(2) 0.0464(5) -0.023(2) 0.100(6) 1.000 . Uani d ?
C(42) 0.581(2) 0.0432(6) 0.069(2) 0.097(6) 1.000 . Uani d ?
C(43) 0.653(2) -0.0049(8) 0.093(1) 0.099(5) 1.000 . Uani d ?
H(1) -0.4635 0.1553 0.3763 0.074 1.000 . Uiso c ?
H(2) -0.3401 0.1167 0.3705 0.074 1.000 . Uiso c ?
H(3) -0.5011 0.0969 0.3562 0.074 1.000 . Uiso c ?
H(4) -0.5834 0.1414 0.6022 0.070 1.000 . Uiso c ?
H(5) -0.5870 0.0820 0.5827 0.070 1.000 . Uiso c ?
H(6) -0.5007 0.1061 0.7362 0.070 1.000 . Uiso c ?
H(7) -0.2103 0.0444 0.4551 0.070 1.000 . Uiso c ?
H(8) -0.0986 -0.0388 0.5047 0.079 1.000 . Uiso c ?
H(9) -0.0975 -0.0872 0.7072 0.081 1.000 . Uiso c ?
H(10) -0.2111 -0.0495 0.8569 0.081 1.000 . Uiso c ?
H(11) -0.3178 0.0333 0.8115 0.070 1.000 . Uiso c ?
H(12) 0.3746 0.0811 -0.0409 0.108 1.000 . Uiso c ?
H(13) 0.6353 0.0734 0.1186 0.110 1.000 . Uiso c ?
H(14) 0.7655 -0.0068 0.1543 0.108 1.000 . Uiso c ?

loop_
_atom_site_aniso_label
_atom_site_aniso_U_11
_atom_site_aniso_U_22
_atom_site_aniso_U_33
_atom_site_aniso_U_12
_atom_site_aniso_U_13
_atom_site_aniso_U_23
  Pt(1)  0.0277(3)   0.0395(3)   0.0320(3)   0.0000      0.0088(2)   0.0000
  Ru(1)  0.0261(5)   0.0278(5)   0.0349(4)   0.0000      0.0083(4)   0.0000
  Ru(2)  0.0415(6)   0.0393(6)   0.0349(5)   0.0000      0.0252(4)   0.0000
  Ru(3)  0.0329(4)   0.0218(4)   0.0334(3)   -0.0012(3)  0.0143(3)   -0.0033(3)
  Ru(4)  0.0356(5)   0.0287(5)   0.0301(4)   0.0000      0.0199(4)   0.0000
  P(1)   0.045(1)    0.035(1)    0.045(1)    -0.012(1)   0.0152(9)   -0.009(1)
  O(10)  0.087(7)    0.11(1)     0.035(5)    0.0000      0.018(5)    0.0000
  O(11)  0.045(7)    0.21(2)     0.106(9)    0.0000      0.006(7)    0.0000
  O(12)  0.22(1)     0.065(6)    0.29(1)     -0.035(7)   0.22(1)     -0.010(7)
  O(13)  0.11(1)     0.58(4)     0.027(6)    0.0000      0.018(7)    0.0000
  O(14)  0.081(5)    0.066(6)    0.104(6)    0.020(5)    -0.003(4)   0.031(5)
  O(15)  0.041(6)    0.32(2)     0.094(8)    0.0000      0.044(6)    0.0000
  O(16)  0.119(6)    0.054(5)    0.057(4)    0.000(4)    0.028(4)    0.023(4)
  O(17)  0.062(4)    0.072(6)    0.135(6)    0.019(4)    0.051(4)    -0.029(5)
  O(18)  0.21(1)     0.107(8)    0.146(8)    0.025(8)    0.128(8)    -0.045(6)
  C(1)   0.024(5)    0.032(7)    0.027(5)    0.0000      0.012(4)    0.0000
  C(10)  0.050(7)    0.061(9)    0.027(6)    0.0000      0.010(5)    0.0000
  C(11)  0.042(8)    0.09(1)     0.047(7)    0.0000      0.003(6)    0.0000
  C(12)  0.12(1)     0.032(6)    0.119(9)    -0.006(6)   0.086(8)    -0.002(6)
  C(13)  0.07(1)     0.21(3)     0.041(8)    0.0000      0.014(8)    0.0000
  C(14)  0.052(5)    0.029(5)    0.055(5)    0.003(4)    0.003(4)    0.001(4)
  C(15)  0.032(8)    0.11(2)     0.074(9)    0.0000      0.018(7)    0.0000
  C(16)  0.059(5)    0.028(5)    0.046(5)    -0.012(4)   0.012(4)    -0.004(4)
  C(17)  0.058(6)    0.035(6)    0.064(5)    -0.013(5)   0.025(4)    -0.019(4)
  C(18)  0.093(8)    0.071(8)    0.065(6)    0.007(6)    0.051(6)    -0.012(5)
  C(21)  0.093(8)    0.051(7)    0.044(5)    -0.012(6)   0.005(5)    -0.002(5)
  C(22)  0.038(5)    0.077(8)    0.104(8)    -0.021(5)   0.026(5)    -0.021(6)
  C(31)  0.052(5)    0.030(5)    0.053(5)    -0.014(4)   0.020(4)    -0.015(4)
  C(32)  0.076(7)    0.046(7)    0.069(6)    -0.019(6)   0.041(5)    -0.017(5)
  C(33)  0.080(7)    0.048(7)    0.101(8)    -0.023(6)   0.053(6)    -0.029(6)
  C(34)  0.092(8)    0.037(6)    0.081(7)    -0.007(6)   0.030(6)    -0.018(6)
  C(35)  0.095(8)    0.056(8)    0.073(6)    -0.001(7)   0.036(6)    0.004(6)
  C(36)  0.096(8)    0.037(7)    0.061(5)    0.004(6)    0.039(5)    -0.004(5)
  C(41)  0.16(2)     0.055(9)    0.13(1)     0.01(1)     0.10(1)     0.017(9)
  C(42)  0.14(1)     0.08(1)     0.10(1)     -0.03(1)    0.08(1)     -0.014(8)
  C(43)  0.11(1)     0.10(1)     0.097(9)    0.00(1)     0.054(8)    0.025(9)
#------------------------------------------------------------------------------
_refine_special_details
;
  ?
;
_refine_ls_structure_factor_coef       F
_refine_ls_matrix_type                 full
_refine_ls_weighting_scheme            'w = 1/[\s^2^(Fo) + 0.00090|Fo|^2^]'
_refine_ls_hydrogen_treatment          noref
_refine_ls_extinction_method           'Zachariasen (1967)'
_refine_ls_extinction_coef             0.00000020(3)
_refine_ls_extinction_expression       'equ(3) Acta Cryst.(1968) A24, p213.'
_refine_ls_abs_structure_details       ?
_refine_ls_abs_structure_Flack         ?
_refine_ls_number_reflns               2637
_refine_ls_number_parameters           287
_refine_ls_number_restraints           0
_refine_ls_number_constraints          0
_refine_ls_R_factor_all                0.0343
_refine_ls_R_factor_gt                 0.0343
_refine_ls_wR_factor_all               0.0462
_refine_ls_wR_factor_ref               0.0462
_refine_ls_goodness_of_fit_all         1.301
_refine_ls_goodness_of_fit_ref         1.301
_refine_ls_shift/esd_max               0.0050
_refine_ls_shift/esd_mean              0.0020
_refine_diff_density_min               -1.48
_refine_diff_density_max               0.97
#------------------------------------------------------------------------------
_geom_special_details
;
  ?
;
loop_
_geom_bond_atom_site_label_1
_geom_bond_atom_site_label_2
_geom_bond_distance
_geom_bond_site_symmetry_1
_geom_bond_site_symmetry_2
_geom_bond_publ_flag
  Pt(1) Ru(2) 2.780(1) . . yes
  Pt(1) Ru(3) 3.0327(7) . . yes
  Pt(1) Ru(3) 3.0327(7) . 4 yes
  Pt(1) Ru(4) 2.8643(8) . . yes
  Pt(1) C(1) 2.053(9) . . yes
  Pt(1) C(10) 2.12(1) . . yes
  Pt(1) C(11) 1.84(1) . . yes
  Ru(1) Ru(2) 2.956(1) . . yes
  Ru(1) Ru(3) 2.8194(8) . . yes
  Ru(1) Ru(3) 2.8194(8) . 4 yes
  Ru(1) Ru(4) 2.964(1) . . yes
  Ru(1) C(1) 2.059(9) . . yes
  Ru(1) C(14) 1.908(9) . . yes
  Ru(1) C(14) 1.908(9) . 4 yes
  Ru(1) C(15) 1.89(1) . . yes
  Ru(2) Ru(3) 2.9271(8) . . yes
  Ru(2) Ru(3) 2.9271(8) . 4 yes
  Ru(2) C(1) 2.032(9) . . yes
  Ru(2) C(10) 1.99(1) . . yes
  Ru(2) C(18) 1.91(1) . . yes
  Ru(2) C(18) 1.91(1) . 4 yes
  Ru(3) Ru(4) 2.9087(8) . . yes
  Ru(3) P(1) 2.344(2) . . yes
  Ru(3) C(1) 2.0850(9) . . yes
  Ru(3) C(16) 1.873(8) . . yes
  Ru(3) C(17) 1.89(1) . . yes
  Ru(4) C(1) 2.037(9) . . yes
  Ru(4) C(12) 1.87(1) . . yes
  Ru(4) C(12) 1.87(1) . 4 yes
  Ru(4) C(13) 1.88(1) . . yes
  P(1) C(21) 1.794(9) . . yes
  P(1) C(22) 1.820(9) . . yes
  P(1) C(31) 1.832(9) . . yes
  O(10) C(10) 1.18(1) . . yes
  O(11) C(11) 1.12(1) . . yes
  O(12) C(12) 1.15(1) . . yes
  O(13) C(13) 1.11(2) . . yes
  O(14) C(14) 1.13(1) . . yes
  O(15) C(15) 1.16(2) . . yes
  O(16) C(16) 1.148(9) . . yes
  O(17) C(17) 1.15(1) . . yes
  O(18) C(18) 1.13(1) . . yes
  C(21) H(1) 0.96 . . no
  C(21) H(2) 0.95 . . no
  C(21) H(3) 0.99 . . no
  C(22) H(4) 0.96 . . no
  C(22) H(5) 0.96 . . no
  C(22) H(6) 0.95 . . no
  C(31) C(32) 1.41(1) . . yes
  C(31) C(36) 1.39(1) . . yes
  C(32) C(33) 1.39(1) . . yes
  C(32) H(7) 0.98 . . no
  C(33) C(34) 1.37(1) . . yes
  C(33) H(8) 0.99 . . no
  C(34) C(35) 1.36(1) . . yes
  C(34) H(9) 1.03 . . no
  C(35) C(36) 1.39(1) . . yes
  C(35) H(10) 0.97 . . no
  C(36) H(11) 0.96 . . no
  C(41) C(42) 1.36(2) . . yes
  C(41) C(43) 1.35(2) . 3_655 yes
  C(41) H(12) 1.02 . . no
  C(42) C(43) 1.39(2) . . yes
  C(42) H(13) 0.96 . . no
  C(43) H(14) 0.99 . . no
#------------------------------------------------------------------------------
loop_
_geom_angle_atom_site_label_1
_geom_angle_atom_site_label_2
_geom_angle_atom_site_label_3
_geom_angle
_geom_angle_site_symmetry_1
_geom_angle_site_symmetry_2
_geom_angle_site_symmetry_3
_geom_angle_publ_flag
  Ru(2) Pt(1)  Ru(3) 60.28(2) . . . yes
  Ru(2) Pt(1)  Ru(3) 60.28(2) . . 4 yes
  Ru(2) Pt(1)  Ru(4) 92.10(3) . . . yes
  Ru(2) Pt(1)  C(1) 46.8(2) . . . yes
  Ru(2) Pt(1)  C(10) 45.6(3) . . . yes
  Ru(2) Pt(1)  C(11) 147.3(4) . . . yes
  Ru(3) Pt(1)  Ru(3) 86.56(2) . . 4 yes
  Ru(3) Pt(1)  Ru(4) 59.03(1) . . . yes
  Ru(3) Pt(1)  C(1) 43.28(1) . . . yes
  Ru(3) Pt(1)  C(10) 92.0(2) . . . yes
  Ru(3) Pt(1)  C(11) 134.8(1) . . . yes
  Ru(3) Pt(1)  Ru(4) 59.03(1) 4 . . yes
  Ru(3) Pt(1)  C(1) 43.28(1) 4 . . yes
  Ru(3) Pt(1)  C(10) 92.0(2) 4 . . yes
  Ru(3) Pt(1)  C(11) 134.8(1) 4 . . yes
  Ru(4) Pt(1)  C(1) 45.3(2) . . . yes
  Ru(4) Pt(1)  C(10) 137.7(3) . . . yes
  Ru(4) Pt(1)  C(11) 120.6(4) . . . yes
  C(1) Pt(1)  C(10) 92.4(4) . . . yes
  C(1) Pt(1)  C(11) 165.9(5) . . . yes
  C(10) Pt(1)  C(11) 101.7(5) . . . yes
  Ru(2) Ru(1)  Ru(3) 60.85(2) . . . yes
  Ru(2) Ru(1)  Ru(3) 60.85(2) . . 4 yes
  Ru(2) Ru(1)  Ru(4) 86.70(3) . . . yes
  Ru(2) Ru(1)  C(1) 43.4(2) . . . yes
  Ru(2) Ru(1)  C(14) 129.6(3) . . . yes
  Ru(2) Ru(1)  C(14) 129.6(3) . . 4 yes
  Ru(2) Ru(1)  C(15) 61.4(4) . . . yes
  Ru(3) Ru(1)  Ru(3) 95.03(3) . . 4 yes
  Ru(3) Ru(1)  Ru(4) 60.32(2) . . . yes
  Ru(3) Ru(1)  C(1) 47.52(2) . . . yes
  Ru(3) Ru(1)  C(14) 83.6(3) . . . yes
  Ru(3) Ru(1)  C(14) 164.7(3) . . 4 yes
  Ru(3) Ru(1)  C(15) 100.2(3) . . . yes
  Ru(3) Ru(1)  Ru(4) 60.32(2) 4 . . yes
  Ru(3) Ru(1)  C(1) 47.52(2) 4 . . yes
  Ru(3) Ru(1)  C(14) 164.7(3) 4 . . yes
  Ru(3) Ru(1)  C(14) 83.6(3) 4 . 4 yes
  Ru(3) Ru(1)  C(15) 100.2(3) 4 . . yes
  Ru(4) Ru(1)  C(1) 43.3(2) . . . yes
  Ru(4) Ru(1)  C(14) 106.5(3) . . . yes
  Ru(4) Ru(1)  C(14) 106.5(3) . . 4 yes
  Ru(4) Ru(1)  C(15) 148.1(4) . . . yes
  C(1) Ru(1)  C(14) 129.3(3) . . . yes
  C(1) Ru(1)  C(14) 129.3(3) . . 4 yes
  C(1) Ru(1)  C(15) 104.7(5) . . . yes
  C(14) Ru(1)  C(14) 93.7(5) . . 4 yes
  C(14) Ru(1)  C(15) 95.1(4) . . . yes
  C(14) Ru(1)  C(15) 95.1(4) 4 . . yes
  Pt(1) Ru(2)  Ru(1) 91.51(3) . . . yes
  Pt(1) Ru(2)  Ru(3) 64.14(2) . . . yes
  Pt(1) Ru(2)  Ru(3) 64.14(2) . . 4 yes
  Pt(1) Ru(2)  C(1) 47.4(2) . . . yes
  Pt(1) Ru(2)  C(10) 49.5(3) . . . yes
  Pt(1) Ru(2)  C(18) 122.3(3) . . . yes
  Pt(1) Ru(2)  C(18) 122.3(3) . . 4 yes
  Ru(1) Ru(2)  Ru(3) 57.27(2) . . . yes
  Ru(1) Ru(2)  Ru(3) 57.27(2) . . 4 yes
  Ru(1) Ru(2)  C(1) 44.1(2) . . . yes
  Ru(1) Ru(2)  C(10) 141.0(3) . . . yes
  Ru(1) Ru(2)  C(18) 113.5(3) . . . yes
  Ru(1) Ru(2)  C(18) 113.5(3) . . 4 yes
  Ru(3) Ru(2)  Ru(3) 90.52(3) . . 4 yes
  Ru(3) Ru(2)  C(1) 45.42(2) . . . yes
  Ru(3) Ru(2)  C(10) 97.8(2) . . . yes
  Ru(3) Ru(2)  C(18) 86.3(3) . . . yes
  Ru(3) Ru(2)  C(18) 170.1(3) . . 4 yes
  Ru(3) Ru(2)  C(1) 45.42(2) 4 . . yes
  Ru(3) Ru(2)  C(10) 97.8(2) 4 . . yes
  Ru(3) Ru(2)  C(18) 170.1(3) 4 . . yes
  Ru(3) Ru(2)  C(18) 86.3(3) 4 . 4 yes
  C(1) Ru(2)  C(10) 96.9(4) . . . yes
  C(1) Ru(2)  C(18) 131.7(3) . . . yes
  C(1) Ru(2)  C(18) 131.7(3) . . 4 yes
  C(10) Ru(2)  C(18) 91.9(4) . . . yes
  C(10) Ru(2)  C(18) 91.9(4) . . 4 yes
  C(18) Ru(2)  C(18) 95.2(6) . . 4 yes
  Pt(1) Ru(3)  Ru(1) 89.18(2) . . . yes
  Pt(1) Ru(3)  Ru(2) 55.58(2) . . . yes
  Pt(1) Ru(3)  Ru(4) 57.60(2) . . . yes
  Pt(1) Ru(3)  P(1) 81.60(6) . . . yes
  Pt(1) Ru(3)  C(1) 42.5(2) . . . yes
  Pt(1) Ru(3)  C(16) 129.8(3) . . . yes
  Pt(1) Ru(3)  C(17) 137.4(3) . . . yes
  Ru(1) Ru(3)  Ru(2) 61.88(2) . . . yes
  Ru(1) Ru(3)  Ru(4) 62.31(3) . . . yes
  Ru(1) Ru(3)  P(1) 169.95(6) . . . yes
  Ru(1) Ru(3)  C(1) 46.7(2) . . . yes
  Ru(1) Ru(3)  C(16) 99.0(2) . . . yes
  Ru(1) Ru(3)  C(17) 93.3(3) . . . yes
  Ru(2) Ru(3)  Ru(4) 88.28(2) . . . yes
  Ru(2) Ru(3)  P(1) 109.12(6) . . . yes
  Ru(2) Ru(3)  C(1) 44.0(2) . . . yes
  Ru(2) Ru(3)  C(16) 160.8(2) . . . yes
  Ru(2) Ru(3)  C(17) 88.7(3) . . . yes
  Ru(4) Ru(3)  P(1) 114.94(6) . . . yes
  Ru(4) Ru(3)  C(1) 44.4(2) . . . yes
  Ru(4) Ru(3)  C(16) 82.8(3) . . . yes
  Ru(4) Ru(3)  C(17) 153.6(2) . . . yes
  P(1) Ru(3)  C(1) 124.0(2) . . . yes
  P(1) Ru(3)  C(16) 90.0(2) . . . yes
  P(1) Ru(3)  C(17) 90.8(3) . . . yes
  C(1) Ru(3)  C(16) 124.1(3) . . . yes
  C(1) Ru(3)  C(17) 125.8(4) . . . yes
  C(16) Ru(3)  C(17) 91.8(4) . . . yes
  Pt(1) Ru(4)  Ru(1) 89.69(3) . . . yes
  Pt(1) Ru(4)  Ru(3) 63.37(2) . . . yes
  Pt(1) Ru(4)  Ru(3) 63.37(2) . . 4 yes
  Pt(1) Ru(4)  C(1) 45.8(2) . . . yes
  Pt(1) Ru(4)  C(12) 98.7(4) . . . yes
  Pt(1) Ru(4)  C(12) 98.7(4) . . 4 yes
  Pt(1) Ru(4)  C(13) 162.0(5) . . . yes
  Ru(1) Ru(4)  Ru(3) 57.37(2) . . . yes
  Ru(1) Ru(4)  Ru(3) 57.37(2) . . 4 yes
  Ru(1) Ru(4)  C(1) 43.9(2) . . . yes
  Ru(1) Ru(4)  C(12) 134.7(3) . . . yes
  Ru(1) Ru(4)  C(12) 134.7(3) . . 4 yes
  Ru(1) Ru(4)  C(13) 72.4(5) . . . yes
  Ru(3) Ru(4)  Ru(3) 91.26(3) . . 4 yes
  Ru(3) Ru(4)  C(1) 45.79(2) . . . yes
  Ru(3) Ru(4)  C(12) 87.0(3) . . . yes
  Ru(3) Ru(4)  C(12) 160.4(4) . . 4 yes
  Ru(3) Ru(4)  C(13) 105.1(4) . . . yes
  Ru(3) Ru(4)  C(1) 45.79(2) 4 . . yes
  Ru(3) Ru(4)  C(12) 160.4(4) 4 . . yes
  Ru(3) Ru(4)  C(12) 87.0(3) 4 . 4 yes
  Ru(3) Ru(4)  C(13) 105.1(4) 4 . . yes
  C(1) Ru(4)  C(12) 127.5(3) . . . yes
  C(1) Ru(4)  C(12) 127.5(3) . . 4 yes
  C(1) Ru(4)  C(13) 116.3(6) . . . yes
  C(12) Ru(4)  C(12) 88.2(6) . . 4 yes
  C(12) Ru(4)  C(13) 94.2(5) . . . yes
  C(12) Ru(4)  C(13) 94.2(5) 4 . . yes
  Ru(3) P(1)  C(21) 117.8(3) . . . yes
  Ru(3) P(1)  C(22) 117.1(3) . . . yes
  Ru(3) P(1)  C(31) 110.1(3) . . . yes
  C(21) P(1)  C(22) 103.6(5) . . . yes
  C(21) P(1)  C(31) 103.3(4) . . . yes
  C(22) P(1)  C(31) 103.1(5) . . . yes
  Pt(1) C(1)  Ru(1) 178.3(5) . . . yes
  Pt(1) C(1)  Ru(2) 85.8(3) . . . yes
  Pt(1) C(1)  Ru(3) 94.3(2) . . . yes
  Pt(1) C(1)  Ru(3) 94.3(2) . . 4 yes
  Pt(1) C(1)  Ru(4) 88.9(4) . . . yes
  Ru(1) C(1)  Ru(2) 92.5(4) . . . yes
  Ru(1) C(1)  Ru(3) 85.7(2) . . . yes
  Ru(1) C(1)  Ru(3) 85.7(2) . . 4 yes
  Ru(1) C(1)  Ru(4) 92.7(3) . . . yes
  Ru(2) C(1)  Ru(3) 90.6(2) . . . yes
  Ru(2) C(1)  Ru(3) 90.6(2) . . 4 yes
  Ru(2) C(1)  Ru(4) 174.7(5) . . . yes
  Ru(3) C(1)  Ru(3) 171.4(5) . . 4 yes
  Ru(3) C(1)  Ru(4) 89.8(2) . . . yes
  Ru(3) C(1)  Ru(4) 89.8(2) 4 . . yes
  Pt(1) C(10)  Ru(2) 84.9(4) . . . yes
  Pt(1) C(10)  O(10) 132(1) . . . yes
  Ru(2) C(10)  O(10) 144(1) . . . yes
  Pt(1) C(11)  O(11) 180(1) . . . yes
  Ru(4) C(12)  O(12) 175(1) . . . yes
  Ru(4) C(13)  O(13) 174(2) . . . yes
  Ru(1) C(14)  O(14) 177.5(9) . . . yes
  Ru(1) C(15)  O(15) 162(1) . . . yes
  Ru(3) C(16)  O(16) 176.1(8) . . . yes
  Ru(3) C(17)  O(17) 174.6(8) . . . yes
  Ru(2) C(18)  O(18) 178(1) . . . yes
  P(1) C(21)  H(1) 112.4 . . . no
  P(1) C(21)  H(2) 112.9 . . . no
  P(1) C(21)  H(3) 110.7 . . . no
  H(1) C(21)  H(2) 109.0 . . . no
  H(1) C(21)  H(3) 105.3 . . . no
  H(2) C(21)  H(3) 106.0 . . . no
  P(1) C(22)  H(4) 110.3 . . . no
  P(1) C(22)  H(5) 110.5 . . . no
  P(1) C(22)  H(6) 111.5 . . . no
  H(4) C(22)  H(5) 107.2 . . . no
  H(4) C(22)  H(6) 108.6 . . . no
  H(5) C(22)  H(6) 108.5 . . . no
  P(1) C(31)  C(32) 121.5(7) . . . yes
  P(1) C(31)  C(36) 120.8(7) . . . yes
  C(32) C(31)  C(36) 117.4(9) . . . yes
  C(31) C(32)  C(33) 120.9(9) . . . yes
  C(31) C(32)  H(7) 118.7 . . . no
  C(33) C(32)  H(7) 120.3 . . . no
  C(32) C(33)  C(34) 119.8(9) . . . yes
  C(32) C(33)  H(8) 119.5 . . . no
  C(34) C(33)  H(8) 120.7 . . . no
  C(33) C(34)  C(35) 121(1) . . . yes
  C(33) C(34)  H(9) 119.0 . . . no
  C(35) C(34)  H(9) 120.4 . . . no
  C(34) C(35)  C(36) 121(1) . . . yes
  C(34) C(35)  H(10) 120.1 . . . no
  C(36) C(35)  H(10) 119.4 . . . no
  C(31) C(36)  C(35) 120.8(9) . . . yes
  C(31) C(36)  H(11) 119.3 . . . no
  C(35) C(36)  H(11) 119.9 . . . no
  C(42) C(41)  C(43) 122(1) . . 3_655 yes
  C(42) C(41)  H(12) 119.5 . . . no
  C(43) C(41)  H(12) 118.3 3_655 . . no
  C(41) C(42)  C(43) 119(1) . . . yes
  C(41) C(42)  H(13) 120.0 . . . no
  C(43) C(42)  H(13) 121.4 . . . no
  C(41) C(43)  C(42) 119(1) 3_655 . . yes
  C(41) C(43)  H(14) 121.9 3_655 . . no
  C(42) C(43)  H(14) 118.5 . . . no
#------------------------------------------------------------------------------
loop_
_geom_contact_atom_site_label_1
_geom_contact_atom_site_label_2
_geom_contact_distance
_geom_contact_site_symmetry_1
_geom_contact_site_symmetry_2
_geom_contact_publ_flag
  O(11)     O(13)     2.79(2)    . 1_454 no
  O(11)     O(15)     3.20(2)    . 1_455 no
  O(11)     O(18)     3.36(1)    . 1_455 no
  O(11)     O(18)     3.36(1)    . 4_455 no
  O(11)     C(18)     3.44(2)    . 1_455 no
  O(11)     C(18)     3.44(2)    . 4_455 no
  O(12)     O(15)     3.17(1)    . 1_455 no
  O(12)     C(41)     3.45(2)    . 1_456 no
  O(12)     C(42)     3.52(2)    . 1_456 no
  O(12)     O(14)     3.59(1)    . 1_455 no
  O(13)     O(18)     2.99(1)    . 1_556 no
  O(13)     O(18)     2.99(1)    . 4_556 no
  O(13)     C(18)     3.04(1)    . 1_556 no
  O(13)     C(18)     3.04(1)    . 4_556 no
  O(15)     C(12)     3.21(2)    . 1_655 no
  O(15)     C(12)     3.21(2)    . 4_655 no
  O(15)     C(11)     3.22(2)    . 1_655 no
  O(16)     C(34)     3.34(1)    . 3_557 no
  O(16)     C(42)     3.53(2)    . 1_456 no
  O(16)     C(35)     3.55(1)    . 3_557 no
  O(17)     C(41)     3.52(2)    . 1_556 no
  O(17)     C(43)     3.52(2)    . 3_656 no
  O(18)     C(34)     3.58(1)    . 3_556 no
#------------------------------------------------------------------------------
loop_
_geom_torsion_atom_site_label_1
_geom_torsion_atom_site_label_2
_geom_torsion_atom_site_label_3
_geom_torsion_atom_site_label_4
_geom_torsion_site_symmetry_1
_geom_torsion_site_symmetry_2
_geom_torsion_site_symmetry_3
_geom_torsion_site_symmetry_4
_geom_torsion
_geom_torsion_publ_flag
  Pt(1) Ru(2) Ru(1) Ru(3) . . . . 57.61(2) no
  Pt(1) Ru(2) Ru(1) Ru(3) . . . 4 -57.61(2) no
  Pt(1) Ru(2) Ru(1) Ru(4) . . . . 0.0000(3) no
  Pt(1) Ru(2) Ru(1) C(1) . . . . 0.0000(1) no
  Pt(1) Ru(2) Ru(1) C(14) . . . . 108.8(4) no
  Pt(1) Ru(2) Ru(1) C(14) . . . 4 -108.8(4) no
  Pt(1) Ru(2) Ru(1) C(15) . . . . 180.0000(2) no
  Pt(1) Ru(2) Ru(3) Ru(1) . . . . -110.27(2) no
  Pt(1) Ru(2) Ru(3) Ru(4) . . . . -51.00(2) no
  Pt(1) Ru(2) Ru(3) P(1) . . . . 64.85(6) no
  Pt(1) Ru(2) Ru(3) C(1) . . . . -54.7(3) no
  Pt(1) Ru(2) Ru(3) C(16) . . . . -113.1(9) no
  Pt(1) Ru(2) Ru(3) C(17) . . . . 155.3(2) no
  Pt(1) Ru(2) Ru(3) Ru(1) . . 4 . 110.27(2) no
  Pt(1) Ru(2) Ru(3) Ru(4) . . 4 . 51.00(2) no
  Pt(1) Ru(2) Ru(3) P(1) . . 4 4 -64.85(6) no
  Pt(1) Ru(2) Ru(3) C(1) . . 4 . 54.7(3) no
  Pt(1) Ru(2) Ru(3) C(16) . . 4 4 113.1(9) no
  Pt(1) Ru(2) Ru(3) C(17) . . 4 4 -155.3(2) no
  Pt(1) Ru(2) C(1) Ru(1) . . . . 180.0000(3) no
  Pt(1) Ru(2) C(1) Ru(3) . . . . 94.2(2) no
  Pt(1) Ru(2) C(1) Ru(3) . . . 4 -94.2(2) no
  Pt(1) Ru(2) C(1) Ru(4) . . . . 0.0000(4) no
  Pt(1) Ru(2) C(10) O(10) . . . . 180.0000(1) no
  Pt(1) Ru(2) C(18) O(18) . . . . 79.2(3) no
  Pt(1) Ru(2) C(18) O(18) . . 4 4 -79.2(3) no
  Pt(1) Ru(3) Ru(1) Ru(2) . . . . -50.71(2) no
  Pt(1) Ru(3) Ru(1) Ru(3) . . . 4 1.78(3) no
  Pt(1) Ru(3) Ru(1) Ru(4) . . . . 53.30(2) no
  Pt(1) Ru(3) Ru(1) C(1) . . . . 1.1(3) no
  Pt(1) Ru(3) Ru(1) C(14) . . . . 166.4(3) no
  Pt(1) Ru(3) Ru(1) C(14) . . . 4 86.0(9) no
  Pt(1) Ru(3) Ru(1) C(15) . . . . -99.6(3) no
  Pt(1) Ru(3) Ru(2) Ru(1) . . . . 110.27(2) no
  Pt(1) Ru(3) Ru(2) Ru(3) . . . 4 60.71(2) no
  Pt(1) Ru(3) Ru(2) C(1) . . . . 54.7(3) no
  Pt(1) Ru(3) Ru(2) C(10) . . . . -37.3(2) no
  Pt(1) Ru(3) Ru(2) C(18) . . . . -128.7(3) no
  Pt(1) Ru(3) Ru(2) C(18) . . . 4 132(2) no
  Pt(1) Ru(3) Ru(4) Ru(1) . . . . -108.29(2) no
  Pt(1) Ru(3) Ru(4) Ru(3) . . . 4 -59.17(2) no
  Pt(1) Ru(3) Ru(4) C(1) . . . . -53.1(3) no
  Pt(1) Ru(3) Ru(4) C(12) . . . . 101.3(4) no
  Pt(1) Ru(3) Ru(4) C(12) . . . 4 25.4(9) no
  Pt(1) Ru(3) Ru(4) C(13) . . . . -165.2(4) no
  Pt(1) Ru(3) P(1) C(21) . . . . 56.2(4) no
  Pt(1) Ru(3) P(1) C(22) . . . . -68.5(4) no
  Pt(1) Ru(3) P(1) C(31) . . . . 174.2(3) no
  Pt(1) Ru(3) C(1) Ru(1) . . . . -178.3(5) no
  Pt(1) Ru(3) C(1) Ru(2) . . . . -85.8(3) no
  Pt(1) Ru(3) C(1) Ru(3) . . . 4 176(4) no
  Pt(1) Ru(3) C(1) Ru(4) . . . . 88.9(4) no
  Pt(1) Ru(3) C(16) O(16) . . . . -147.9(1) no
  Pt(1) Ru(3) C(17) O(17) . . . . 136(9) no
  Pt(1) Ru(3) Ru(1) Ru(2) . 4 . . 50.71(2) no
  Pt(1) Ru(3) Ru(1) Ru(3) . 4 . . -1.78(3) no
  Pt(1) Ru(3) Ru(1) Ru(4) . 4 . . -53.30(2) no
  Pt(1) Ru(3) Ru(1) C(1) . 4 . . -1.1(3) no
  Pt(1) Ru(3) Ru(1) C(14) . 4 . . -86.0(9) no
  Pt(1) Ru(3) Ru(1) C(14) . 4 . 4 -166.4(3) no
  Pt(1) Ru(3) Ru(1) C(15) . 4 . . 99.6(3) no
  Pt(1) Ru(3) Ru(2) Ru(1) . 4 . . -110.27(2) no
  Pt(1) Ru(3) Ru(2) Ru(3) . 4 . . -60.71(2) no
  Pt(1) Ru(3) Ru(2) C(1) . 4 . . -54.7(3) no
  Pt(1) Ru(3) Ru(2) C(10) . 4 . . 37.3(2) no
  Pt(1) Ru(3) Ru(2) C(18) . 4 . . -132(2) no
  Pt(1) Ru(3) Ru(2) C(18) . 4 . 4 128.7(3) no
  Pt(1) Ru(3) Ru(4) Ru(1) . 4 . . 108.29(2) no
  Pt(1) Ru(3) Ru(4) Ru(3) . 4 . . 59.17(2) no
  Pt(1) Ru(3) Ru(4) C(1) . 4 . . 53.1(3) no
  Pt(1) Ru(3) Ru(4) C(12) . 4 . . -25.4(9) no
  Pt(1) Ru(3) Ru(4) C(12) . 4 . 4 -101.3(4) no
  Pt(1) Ru(3) Ru(4) C(13) . 4 . . 165.2(4) no
  Pt(1) Ru(3) C(1) Ru(1) . 4 . . 178.3(5) no
  Pt(1) Ru(3) C(1) Ru(2) . 4 . . 85.8(3) no
  Pt(1) Ru(3) C(1) Ru(3) . 4 . . -176(4) no
  Pt(1) Ru(3) C(1) Ru(4) . 4 . . -88.9(4) no
  Pt(1) Ru(3) C(16) O(16) . 4 4 4 147.9(1) no
  Pt(1) Ru(4) Ru(1) Ru(2) . . . . 0.0000(2) no
  Pt(1) Ru(4) Ru(1) Ru(3) . . . . -58.08(2) no
  Pt(1) Ru(4) Ru(1) Ru(3) . . . 4 58.08(2) no
  Pt(1) Ru(4) Ru(1) C(1) . . . . 0.0000(1) no
  Pt(1) Ru(4) Ru(1) C(14) . . . . -130.5(3) no
  Pt(1) Ru(4) Ru(1) C(14) . . . 4 130.5(3) no
  Pt(1) Ru(4) Ru(1) C(15) . . . . 0.0000 no
  Pt(1) Ru(4) Ru(3) Ru(1) . . . . 108.29(2) no
  Pt(1) Ru(4) Ru(3) Ru(2) . . . . 49.40(2) no
  Pt(1) Ru(4) Ru(3) P(1) . . . . -60.93(6) no
  Pt(1) Ru(4) Ru(3) C(1) . . . . 53.1(3) no
  Pt(1) Ru(4) Ru(3) C(16) . . . . -147.6(3) no
  Pt(1) Ru(4) Ru(3) C(17) . . . . 133.0(6) no
  Pt(1) Ru(4) Ru(3) Ru(1) . . 4 . -108.29(2) no
  Pt(1) Ru(4) Ru(3) Ru(2) . . 4 . -49.40(2) no
  Pt(1) Ru(4) Ru(3) P(1) . . 4 4 60.93(6) no
  Pt(1) Ru(4) Ru(3) C(1) . . 4 . -53.1(3) no
  Pt(1) Ru(4) Ru(3) C(16) . . 4 4 147.6(3) no
  Pt(1) Ru(4) Ru(3) C(17) . . 4 4 -133.0(6) no
  Pt(1) Ru(4) C(1) Ru(1) . . . . 180.0000(3) no
  Pt(1) Ru(4) C(1) Ru(2) . . . . 0.0000 no
  Pt(1) Ru(4) C(1) Ru(3) . . . . -94.3(2) no
  Pt(1) Ru(4) C(1) Ru(3) . . . 4 94.3(2) no
  Pt(1) Ru(4) C(12) O(12) . . . . -108.5(2) no
  Pt(1) Ru(4) C(12) O(12) . . 4 4 108.5(2) no
  Pt(1) Ru(4) C(13) O(13) . . . . 180.0000(1) no
  Pt(1) C(1) Ru(1) Ru(2) . . . . 0.0000(1) no
  Pt(1) C(1) Ru(1) Ru(3) . . . . -90.4(2) no
  Pt(1) C(1) Ru(1) Ru(3) . . . 4 90.4(2) no
  Pt(1) C(1) Ru(1) Ru(4) . . . . 180.0000(1) no
  Pt(1) C(1) Ru(1) C(14) . . . . -109.5(4) no
  Pt(1) C(1) Ru(1) C(14) . . . 4 109.5(4) no
  Pt(1) C(1) Ru(1) C(15) . . . . 0.0000(2) no
  Pt(1) C(1) Ru(2) Ru(1) . . . . 180.0000(3) no
  Pt(1) C(1) Ru(2) Ru(3) . . . . -94.2(2) no
  Pt(1) C(1) Ru(2) Ru(3) . . . 4 94.2(2) no
  Pt(1) C(1) Ru(2) C(10) . . . . 0.0000 no
  Pt(1) C(1) Ru(2) C(18) . . . . -98.8(5) no
  Pt(1) C(1) Ru(2) C(18) . . . 4 98.8(5) no
  Pt(1) C(1) Ru(3) Ru(1) . . . . 178.3(5) no
  Pt(1) C(1) Ru(3) Ru(2) . . . . 85.8(3) no
  Pt(1) C(1) Ru(3) Ru(4) . . . . -88.9(4) no
  Pt(1) C(1) Ru(3) P(1) . . . . 3.3(4) no
  Pt(1) C(1) Ru(3) C(16) . . . . -113.9(4) no
  Pt(1) C(1) Ru(3) C(17) . . . . 123.8(4) no
  Pt(1) C(1) Ru(3) Ru(1) . . 4 . -178.3(5) no
  Pt(1) C(1) Ru(3) Ru(2) . . 4 . -85.8(3) no
  Pt(1) C(1) Ru(3) Ru(4) . . 4 . 88.9(4) no
  Pt(1) C(1) Ru(3) P(1) . . 4 4 -3.3(4) no
  Pt(1) C(1) Ru(3) C(16) . . 4 4 113.9(4) no
  Pt(1) C(1) Ru(3) C(17) . . 4 4 -123.8(4) no
  Pt(1) C(1) Ru(4) Ru(1) . . . . 180.0000(3) no
  Pt(1) C(1) Ru(4) Ru(3) . . . . 94.3(2) no
  Pt(1) C(1) Ru(4) Ru(3) . . . 4 -94.3(2) no
  Pt(1) C(1) Ru(4) C(12) . . . . 61.2(5) no
  Pt(1) C(1) Ru(4) C(12) . . . 4 -61.2(5) no
  Pt(1) C(1) Ru(4) C(13) . . . . 180.0000(1) no
  Pt(1) C(10) Ru(2) Ru(1) . . . . 0.0000(1) no
  Pt(1) C(10) Ru(2) Ru(3) . . . . 45.81(4) no
  Pt(1) C(10) Ru(2) Ru(3) . . . 4 -45.81(4) no
  Pt(1) C(10) Ru(2) C(1) . . . . 0.0000 no
  Pt(1) C(10) Ru(2) C(18) . . . . 132.4(3) no
  Pt(1) C(10) Ru(2) C(18) . . . 4 -132.4(3) no
  Ru(1) Ru(2) Pt(1) Ru(3) . . . . -52.13(1) no
  Ru(1) Ru(2) Pt(1) Ru(3) . . . 4 52.13(1) no
  Ru(1) Ru(2) Pt(1) Ru(4) . . . . 0.0000(1) no
  Ru(1) Ru(2) Pt(1) C(1) . . . . 0.0000(1) no
  Ru(1) Ru(2) Pt(1) C(10) . . . . 180.0000(1) no
  Ru(1) Ru(2) Pt(1) C(11) . . . . 180.0000(1) no
  Ru(1) Ru(2) Ru(3) Ru(4) . . . . 59.27(3) no
  Ru(1) Ru(2) Ru(3) P(1) . . . . 175.12(7) no
  Ru(1) Ru(2) Ru(3) C(1) . . . . 55.6(3) no
  Ru(1) Ru(2) Ru(3) C(16) . . . . -2.8(9) no
  Ru(1) Ru(2) Ru(3) C(17) . . . . -94.5(2) no
  Ru(1) Ru(2) Ru(3) Ru(4) . . 4 . -59.27(3) no
  Ru(1) Ru(2) Ru(3) P(1) . . 4 4 -175.12(7) no
  Ru(1) Ru(2) Ru(3) C(1) . . 4 . -55.6(3) no
  Ru(1) Ru(2) Ru(3) C(16) . . 4 4 2.8(9) no
  Ru(1) Ru(2) Ru(3) C(17) . . 4 4 94.5(2) no
  Ru(1) Ru(2) C(1) Ru(3) . . . . -85.8(2) no
  Ru(1) Ru(2) C(1) Ru(3) . . . 4 85.8(2) no
  Ru(1) Ru(2) C(1) Ru(4) . . . . 180.0000 no
  Ru(1) Ru(2) C(10) O(10) . . . . 180.0000(1) no
  Ru(1) Ru(2) C(18) O(18) . . . . -172.9(3) no
  Ru(1) Ru(2) C(18) O(18) . . 4 4 172.9(3) no
  Ru(1) Ru(3) Pt(1) Ru(2) . . . . 55.83(2) no
  Ru(1) Ru(3) Pt(1) Ru(3) . . . 4 -1.65(3) no
  Ru(1) Ru(3) Pt(1) Ru(4) . . . . -57.23(2) no
  Ru(1) Ru(3) Pt(1) C(1) . . . . -1.2(4) no
  Ru(1) Ru(3) Pt(1) C(10) . . . . 90.2(2) no
  Ru(1) Ru(3) Pt(1) C(11) . . . . -161.2(6) no
  Ru(1) Ru(3) Ru(2) Ru(3) . . . 4 -49.56(3) no
  Ru(1) Ru(3) Ru(2) C(1) . . . . -55.6(3) no
  Ru(1) Ru(3) Ru(2) C(10) . . . . -147.6(2) no
  Ru(1) Ru(3) Ru(2) C(18) . . . . 121.0(3) no
  Ru(1) Ru(3) Ru(2) C(18) . . . 4 22(2) no
  Ru(1) Ru(3) Ru(4) Ru(3) . . . 4 49.11(2) no
  Ru(1) Ru(3) Ru(4) C(1) . . . . 55.2(3) no
  Ru(1) Ru(3) Ru(4) C(12) . . . . -150.4(4) no
  Ru(1) Ru(3) Ru(4) C(12) . . . 4 133.6(9) no
  Ru(1) Ru(3) Ru(4) C(13) . . . . -56.9(4) no
  Ru(1) Ru(3) P(1) C(21) . . . . 32.7(6) no
  Ru(1) Ru(3) P(1) C(22) . . . . -92.0(5) no
  Ru(1) Ru(3) P(1) C(31) . . . . 150.7(4) no
  Ru(1) Ru(3) C(1) Ru(2) . . . . 92.5(4) no
  Ru(1) Ru(3) C(1) Ru(3) . . . 4 -6(3) no
  Ru(1) Ru(3) C(1) Ru(4) . . . . -92.8(3) no
  Ru(1) Ru(3) C(16) O(16) . . . . -51.4(1) no
  Ru(1) Ru(3) C(17) O(17) . . . . 44(9) no
  Ru(1) Ru(3) Pt(1) Ru(2) . 4 . . -55.83(2) no
  Ru(1) Ru(3) Pt(1) Ru(3) . 4 . . 1.65(3) no
  Ru(1) Ru(3) Pt(1) Ru(4) . 4 . . 57.23(2) no
  Ru(1) Ru(3) Pt(1) C(1) . 4 . . 1.2(4) no
  Ru(1) Ru(3) Pt(1) C(10) . 4 . . -90.2(2) no
  Ru(1) Ru(3) Pt(1) C(11) . 4 . . 161.2(6) no
  Ru(1) Ru(3) Ru(2) Ru(3) . 4 . . 49.56(3) no
  Ru(1) Ru(3) Ru(2) C(1) . 4 . . 55.6(3) no
  Ru(1) Ru(3) Ru(2) C(10) . 4 . . 147.6(2) no
  Ru(1) Ru(3) Ru(2) C(18) . 4 . . -22(2) no
  Ru(1) Ru(3) Ru(2) C(18) . 4 . 4 -121.0(3) no
  Ru(1) Ru(3) Ru(4) Ru(3) . 4 . . -49.11(2) no
  Ru(1) Ru(3) Ru(4) C(1) . 4 . . -55.2(3) no
  Ru(1) Ru(3) Ru(4) C(12) . 4 . . -133.6(9) no
  Ru(1) Ru(3) Ru(4) C(12) . 4 . 4 150.4(4) no
  Ru(1) Ru(3) Ru(4) C(13) . 4 . . 56.9(4) no
  Ru(1) Ru(3) C(1) Ru(2) . 4 . . -92.5(4) no
  Ru(1) Ru(3) C(1) Ru(3) . 4 . . 6(3) no
  Ru(1) Ru(3) C(1) Ru(4) . 4 . . 92.8(3) no
  Ru(1) Ru(3) C(16) O(16) . 4 4 4 51.4(1) no
  Ru(1) Ru(4) Pt(1) Ru(2) . . . . 0.0000(1) no
  Ru(1) Ru(4) Pt(1) Ru(3) . . . . 53.09(2) no
  Ru(1) Ru(4) Pt(1) Ru(3) . . . 4 -53.09(2) no
  Ru(1) Ru(4) Pt(1) C(1) . . . . 0.0000 no
  Ru(1) Ru(4) Pt(1) C(10) . . . . 0.0000 no
  Ru(1) Ru(4) Pt(1) C(11) . . . . 180.0000 no
  Ru(1) Ru(4) Ru(3) Ru(2) . . . . -58.88(3) no
  Ru(1) Ru(4) Ru(3) P(1) . . . . -169.22(7) no
  Ru(1) Ru(4) Ru(3) C(1) . . . . -55.2(3) no
  Ru(1) Ru(4) Ru(3) C(16) . . . . 104.1(3) no
  Ru(1) Ru(4) Ru(3) C(17) . . . . 24.8(6) no
  Ru(1) Ru(4) Ru(3) Ru(2) . . 4 . 58.88(3) no
  Ru(1) Ru(4) Ru(3) P(1) . . 4 4 169.22(7) no
  Ru(1) Ru(4) Ru(3) C(1) . . 4 . 55.2(3) no
  Ru(1) Ru(4) Ru(3) C(16) . . 4 4 -104.1(3) no
  Ru(1) Ru(4) Ru(3) C(17) . . 4 4 -24.8(6) no
  Ru(1) Ru(4) C(1) Ru(2) . . . . 180.0000(1) no
  Ru(1) Ru(4) C(1) Ru(3) . . . . 85.7(2) no
  Ru(1) Ru(4) C(1) Ru(3) . . . 4 -85.7(2) no
  Ru(1) Ru(4) C(12) O(12) . . . . 153.3(2) no
  Ru(1) Ru(4) C(12) O(12) . . 4 4 -153.3(2) no
  Ru(1) Ru(4) C(13) O(13) . . . . 180.0000(1) no
  Ru(1) C(1) Pt(1) Ru(2) . . . . 0.0000(1) no
  Ru(1) C(1) Pt(1) Ru(3) . . . . 90.3(3) no
  Ru(1) C(1) Pt(1) Ru(3) . . . 4 -90.3(3) no
  Ru(1) C(1) Pt(1) Ru(4) . . . . 180.0000 no
  Ru(1) C(1) Pt(1) C(10) . . . . 0.0000 no
  Ru(1) C(1) Pt(1) C(11) . . . . 180.0000(3) no
  Ru(1) C(1) Ru(2) Ru(3) . . . . 85.8(2) no
  Ru(1) C(1) Ru(2) Ru(3) . . . 4 -85.8(2) no
  Ru(1) C(1) Ru(2) C(10) . . . . 180.0000 no
  Ru(1) C(1) Ru(2) C(18) . . . . 81.2(5) no
  Ru(1) C(1) Ru(2) C(18) . . . 4 -81.2(5) no
  Ru(1) C(1) Ru(3) Ru(2) . . . . -92.5(4) no
  Ru(1) C(1) Ru(3) Ru(4) . . . . 92.8(3) no
  Ru(1) C(1) Ru(3) P(1) . . . . -175.02(9) no
  Ru(1) C(1) Ru(3) C(16) . . . . 67.8(5) no
  Ru(1) C(1) Ru(3) C(17) . . . . -54.5(5) no
  Ru(1) C(1) Ru(3) Ru(2) . . 4 . 92.5(4) no
  Ru(1) C(1) Ru(3) Ru(4) . . 4 . -92.8(3) no
  Ru(1) C(1) Ru(3) P(1) . . 4 4 175.02(9) no
  Ru(1) C(1) Ru(3) C(16) . . 4 4 -67.8(5) no
  Ru(1) C(1) Ru(3) C(17) . . 4 4 54.5(5) no
  Ru(1) C(1) Ru(4) Ru(3) . . . . -85.7(2) no
  Ru(1) C(1) Ru(4) Ru(3) . . . 4 85.7(2) no
  Ru(1) C(1) Ru(4) C(12) . . . . -118.8(5) no
  Ru(1) C(1) Ru(4) C(12) . . . 4 118.8(5) no
  Ru(1) C(1) Ru(4) C(13) . . . . 0.0000(1) no
  Ru(2) Pt(1) Ru(3) Ru(4) . . . . 113.06(2) no
  Ru(2) Pt(1) Ru(3) P(1) . . . . -120.17(6) no
  Ru(2) Pt(1) Ru(3) C(1) . . . . 57.0(4) no
  Ru(2) Pt(1) Ru(3) C(16) . . . . 156.8(3) no
  Ru(2) Pt(1) Ru(3) C(17) . . . . -38.2(4) no
  Ru(2) Pt(1) Ru(3) Ru(4) . . 4 . -113.06(2) no
  Ru(2) Pt(1) Ru(3) P(1) . . 4 4 120.17(6) no
  Ru(2) Pt(1) Ru(3) C(1) . . 4 . -57.0(4) no
  Ru(2) Pt(1) Ru(3) C(16) . . 4 4 -156.8(3) no
  Ru(2) Pt(1) Ru(3) C(17) . . 4 4 38.2(4) no
  Ru(2) Pt(1) Ru(4) Ru(3) . . . . -53.09(2) no
  Ru(2) Pt(1) Ru(4) Ru(3) . . . 4 53.09(2) no
  Ru(2) Pt(1) Ru(4) C(1) . . . . 0.0000 no
  Ru(2) Pt(1) Ru(4) C(12) . . . . -135.3(3) no
  Ru(2) Pt(1) Ru(4) C(12) . . . 4 135.3(3) no
  Ru(2) Pt(1) Ru(4) C(13) . . . . 0.0000 no
  Ru(2) Pt(1) C(1) Ru(3) . . . . -90.3(3) no
  Ru(2) Pt(1) C(1) Ru(3) . . . 4 90.3(3) no
  Ru(2) Pt(1) C(1) Ru(4) . . . . 180.0000(1) no
  Ru(2) Pt(1) C(10) O(10) . . . . 180.0000(1) no
  Ru(2) Pt(1) C(11) O(11) . . . . 0.0000(2) no
  Ru(2) Ru(1) Ru(3) Ru(4) . . . . -104.00(3) no
  Ru(2) Ru(1) Ru(3) P(1) . . . . -27.5(3) no
  Ru(2) Ru(1) Ru(3) C(1) . . . . -51.8(3) no
  Ru(2) Ru(1) Ru(3) C(16) . . . . 179.1(3) no
  Ru(2) Ru(1) Ru(3) C(17) . . . . 86.8(3) no
  Ru(2) Ru(1) Ru(3) Ru(4) . . 4 . 104.00(3) no
  Ru(2) Ru(1) Ru(3) P(1) . . 4 4 27.5(3) no
  Ru(2) Ru(1) Ru(3) C(1) . . 4 . 51.8(3) no
  Ru(2) Ru(1) Ru(3) C(16) . . 4 4 -179.1(3) no
  Ru(2) Ru(1) Ru(3) C(17) . . 4 4 -86.8(3) no
  Ru(2) Ru(1) Ru(4) Ru(3) . . . . 58.08(2) no
  Ru(2) Ru(1) Ru(4) Ru(3) . . . 4 -58.08(2) no
  Ru(2) Ru(1) Ru(4) C(1) . . . . 0.0000(3) no
  Ru(2) Ru(1) Ru(4) C(12) . . . . 101.9(5) no
  Ru(2) Ru(1) Ru(4) C(12) . . . 4 -101.9(5) no
  Ru(2) Ru(1) Ru(4) C(13) . . . . 180.0000(1) no
  Ru(2) Ru(1) C(1) Ru(3) . . . . 90.4(2) no
  Ru(2) Ru(1) C(1) Ru(3) . . . 4 -90.4(2) no
  Ru(2) Ru(1) C(1) Ru(4) . . . . 180.0000(3) no
  Ru(2) Ru(1) C(14) O(14) . . . . 98.6(2) no
  Ru(2) Ru(1) C(14) O(14) . . 4 4 -98.6(2) no
  Ru(2) Ru(1) C(15) O(15) . . . . 180.0000 no
  Ru(2) Ru(3) Pt(1) Ru(3) . . . 4 -57.49(2) no
  Ru(2) Ru(3) Pt(1) Ru(4) . . . . -113.06(2) no
  Ru(2) Ru(3) Pt(1) C(1) . . . . -57.0(4) no
  Ru(2) Ru(3) Pt(1) C(10) . . . . 34.4(2) no
  Ru(2) Ru(3) Pt(1) C(11) . . . . 143.0(6) no
  Ru(2) Ru(3) Ru(1) Ru(3) . . . 4 52.49(3) no
  Ru(2) Ru(3) Ru(1) Ru(4) . . . . 104.00(3) no
  Ru(2) Ru(3) Ru(1) C(1) . . . . 51.8(3) no
  Ru(2) Ru(3) Ru(1) C(14) . . . . -142.9(3) no
  Ru(2) Ru(3) Ru(1) C(14) . . . 4 136.7(9) no
  Ru(2) Ru(3) Ru(1) C(15) . . . . -48.8(3) no
  Ru(2) Ru(3) Ru(4) Ru(3) . . . 4 -9.77(3) no
  Ru(2) Ru(3) Ru(4) C(1) . . . . -3.7(3) no
  Ru(2) Ru(3) Ru(4) C(12) . . . . 150.7(4) no
  Ru(2) Ru(3) Ru(4) C(12) . . . 4 74.8(9) no
  Ru(2) Ru(3) Ru(4) C(13) . . . . -115.8(4) no
  Ru(2) Ru(3) P(1) C(21) . . . . 7.2(4) no
  Ru(2) Ru(3) P(1) C(22) . . . . -117.5(4) no
  Ru(2) Ru(3) P(1) C(31) . . . . 125.2(3) no
  Ru(2) Ru(3) C(1) Ru(3) . . . 4 -98(3) no
  Ru(2) Ru(3) C(1) Ru(4) . . . . 174.7(5) no
  Ru(2) Ru(3) C(16) O(16) . . . . -49.0(1) no
  Ru(2) Ru(3) C(17) O(17) . . . . 106(9) no
  Ru(2) Ru(3) Pt(1) Ru(3) . 4 . . 57.49(2) no
  Ru(2) Ru(3) Pt(1) Ru(4) . 4 . . 113.06(2) no
  Ru(2) Ru(3) Pt(1) C(1) . 4 . . 57.0(4) no
  Ru(2) Ru(3) Pt(1) C(10) . 4 . . -34.4(2) no
  Ru(2) Ru(3) Pt(1) C(11) . 4 . . -143.0(6) no
  Ru(2) Ru(3) Ru(1) Ru(3) . 4 . . -52.49(3) no
  Ru(2) Ru(3) Ru(1) Ru(4) . 4 . . -104.00(3) no
  Ru(2) Ru(3) Ru(1) C(1) . 4 . . -51.8(3) no
  Ru(2) Ru(3) Ru(1) C(14) . 4 . . -136.7(9) no
  Ru(2) Ru(3) Ru(1) C(14) . 4 . 4 142.9(3) no
  Ru(2) Ru(3) Ru(1) C(15) . 4 . . 48.8(3) no
  Ru(2) Ru(3) Ru(4) Ru(3) . 4 . . 9.77(3) no
  Ru(2) Ru(3) Ru(4) C(1) . 4 . . 3.7(3) no
  Ru(2) Ru(3) Ru(4) C(12) . 4 . . -74.8(9) no
  Ru(2) Ru(3) Ru(4) C(12) . 4 . 4 -150.7(4) no
  Ru(2) Ru(3) Ru(4) C(13) . 4 . . 115.8(4) no
  Ru(2) Ru(3) C(1) Ru(3) . 4 . . 98(3) no
  Ru(2) Ru(3) C(1) Ru(4) . 4 . . -174.7(5) no
  Ru(2) Ru(3) C(16) O(16) . 4 4 4 49.0(1) no
  Ru(2) C(1) Pt(1) Ru(3) . . . . 90.3(3) no
  Ru(2) C(1) Pt(1) Ru(3) . . . 4 -90.3(3) no
  Ru(2) C(1) Pt(1) Ru(4) . . . . 180.0000(1) no
  Ru(2) C(1) Pt(1) C(10) . . . . 0.0000(1) no
  Ru(2) C(1) Pt(1) C(11) . . . . 180.0000(1) no
  Ru(2) C(1) Ru(1) Ru(3) . . . . -90.4(2) no
  Ru(2) C(1) Ru(1) Ru(3) . . . 4 90.4(2) no
  Ru(2) C(1) Ru(1) Ru(4) . . . . 180.0000(3) no
  Ru(2) C(1) Ru(1) C(14) . . . . -109.5(4) no
  Ru(2) C(1) Ru(1) C(14) . . . 4 109.5(4) no
  Ru(2) C(1) Ru(1) C(15) . . . . 0.0000(1) no
  Ru(2) C(1) Ru(3) Ru(4) . . . . -174.7(5) no
  Ru(2) C(1) Ru(3) P(1) . . . . -82.5(3) no
  Ru(2) C(1) Ru(3) C(16) . . . . 160.3(3) no
  Ru(2) C(1) Ru(3) C(17) . . . . 38.0(5) no
  Ru(2) C(1) Ru(3) Ru(4) . . 4 . 174.7(5) no
  Ru(2) C(1) Ru(3) P(1) . . 4 4 82.5(3) no
  Ru(2) C(1) Ru(3) C(16) . . 4 4 -160.3(3) no
  Ru(2) C(1) Ru(3) C(17) . . 4 4 -38.0(5) no
  Ru(2) C(1) Ru(4) Ru(3) . . . . 94.3(2) no
  Ru(2) C(1) Ru(4) Ru(3) . . . 4 -94.3(2) no
  Ru(2) C(1) Ru(4) C(12) . . . . 61.2(5) no
  Ru(2) C(1) Ru(4) C(12) . . . 4 -61.2(5) no
  Ru(2) C(1) Ru(4) C(13) . . . . 180.0000(4) no
  Ru(2) C(10) Pt(1) Ru(3) . . . . -43.31(1) no
  Ru(2) C(10) Pt(1) Ru(3) . . . 4 43.31(1) no
  Ru(2) C(10) Pt(1) Ru(4) . . . . 0.0000(1) no
  Ru(2) C(10) Pt(1) C(1) . . . . 0.0000(1) no
  Ru(2) C(10) Pt(1) C(11) . . . . 180.0000(1) no
  Ru(3) Pt(1) Ru(2) C(1) . . . . -52.13(1) no
  Ru(3) Pt(1) Ru(2) C(10) . . . . 127.87(1) no
  Ru(3) Pt(1) Ru(2) C(18) . . . . 67.0(4) no
  Ru(3) Pt(1) Ru(2) C(18) . . . 4 -171.3(4) no
  Ru(3) Pt(1) Ru(3) Ru(4) . . 4 . -55.58(2) no
  Ru(3) Pt(1) Ru(3) P(1) . . 4 4 177.66(5) no
  Ru(3) Pt(1) Ru(3) C(1) . . 4 . 0.4(4) no
  Ru(3) Pt(1) Ru(3) C(16) . . 4 4 -99.4(3) no
  Ru(3) Pt(1) Ru(3) C(17) . . 4 4 95.7(4) no
  Ru(3) Pt(1) Ru(4) C(1) . . . . 53.09(2) no
  Ru(3) Pt(1) Ru(4) C(12) . . . . -82.2(3) no
  Ru(3) Pt(1) Ru(4) C(12) . . . 4 -171.6(3) no
  Ru(3) Pt(1) Ru(4) C(13) . . . . 53.09(2) no
  Ru(3) Pt(1) C(1) Ru(4) . . . . -89.7(3) no
  Ru(3) Pt(1) C(10) O(10) . . . . 136.69(1) no
  Ru(3) Pt(1) C(11) O(11) . . . . -104.8(4) no
  Ru(3) Ru(1) Ru(2) C(1) . . . . 57.61(2) no
  Ru(3) Ru(1) Ru(2) C(10) . . . . 57.61(2) no
  Ru(3) Ru(1) Ru(2) C(18) . . . . -68.8(4) no
  Ru(3) Ru(1) Ru(2) C(18) . . . 4 -176.0(4) no
  Ru(3) Ru(1) Ru(3) Ru(4) . . 4 . 51.52(3) no
  Ru(3) Ru(1) Ru(3) P(1) . . 4 4 -25.0(4) no
  Ru(3) Ru(1) Ru(3) C(1) . . 4 . -0.7(3) no
  Ru(3) Ru(1) Ru(3) C(16) . . 4 4 128.4(3) no
  Ru(3) Ru(1) Ru(3) C(17) . . 4 4 -139.2(3) no
  Ru(3) Ru(1) Ru(4) C(1) . . . . -58.08(2) no
  Ru(3) Ru(1) Ru(4) C(12) . . . . 43.9(5) no
  Ru(3) Ru(1) Ru(4) C(12) . . . 4 -160.0(5) no
  Ru(3) Ru(1) Ru(4) C(13) . . . . 121.92(2) no
  Ru(3) Ru(1) C(1) Ru(4) . . . . 89.6(2) no
  Ru(3) Ru(1) C(14) O(14) . . . . 141.8(2) no
  Ru(3) Ru(1) C(14) O(14) . . 4 4 132.5(2) no
  Ru(3) Ru(1) C(15) O(15) . . . . -131.47(6) no
  Ru(3) Ru(2) Pt(1) Ru(4) . . . . 52.13(1) no
  Ru(3) Ru(2) Pt(1) C(1) . . . . 52.13(1) no
  Ru(3) Ru(2) Pt(1) C(10) . . . . -127.87(1) no
  Ru(3) Ru(2) Pt(1) C(11) . . . . -127.87(1) no
  Ru(3) Ru(2) Ru(1) Ru(4) . . . . -57.61(2) no
  Ru(3) Ru(2) Ru(1) C(1) . . . . -57.61(2) no
  Ru(3) Ru(2) Ru(1) C(14) . . . . 51.2(4) no
  Ru(3) Ru(2) Ru(1) C(14) . . . 4 -166.4(4) no
  Ru(3) Ru(2) Ru(1) C(15) . . . . 122.39(2) no
  Ru(3) Ru(2) Ru(3) Ru(4) . . 4 . -9.71(3) no
  Ru(3) Ru(2) Ru(3) P(1) . . 4 4 -125.56(6) no
  Ru(3) Ru(2) Ru(3) C(1) . . 4 . -6.0(3) no
  Ru(3) Ru(2) Ru(3) C(16) . . 4 4 52.3(9) no
  Ru(3) Ru(2) Ru(3) C(17) . . 4 4 144.0(2) no
  Ru(3) Ru(2) C(1) Ru(4) . . . . -94.2(2) no
  Ru(3) Ru(2) C(10) O(10) . . . . -134.19(4) no
  Ru(3) Ru(2) C(18) O(18) . . . . 135.3(3) no
  Ru(3) Ru(2) C(18) O(18) . . 4 4 152.9(3) no
  Ru(3) Ru(4) Pt(1) C(1) . . . . -53.09(2) no
  Ru(3) Ru(4) Pt(1) C(10) . . . . -53.09(2) no
  Ru(3) Ru(4) Pt(1) C(11) . . . . 126.91(2) no
  Ru(3) Ru(4) Ru(1) C(1) . . . . 58.08(2) no
  Ru(3) Ru(4) Ru(1) C(14) . . . . -72.4(3) no
  Ru(3) Ru(4) Ru(1) C(14) . . . 4 -171.4(3) no
  Ru(3) Ru(4) Ru(1) C(15) . . . . 58.08(2) no
  Ru(3) Ru(4) Ru(3) P(1) . . 4 4 120.10(6) no
  Ru(3) Ru(4) Ru(3) C(1) . . 4 . 6.1(3) no
  Ru(3) Ru(4) Ru(3) C(16) . . 4 4 -153.2(3) no
  Ru(3) Ru(4) Ru(3) C(17) . . 4 4 -73.9(6) no
  Ru(3) Ru(4) C(12) O(12) . . . . -171.0(2) no
  Ru(3) Ru(4) C(12) O(12) . . 4 4 85.7(2) no
  Ru(3) Ru(4) C(13) O(13) . . . . -132.2(1) no
  Ru(3) P(1) C(31) C(32) . . . . -92.5(7) no
  Ru(3) P(1) C(31) C(36) . . . . 81.0(8) no
  Ru(3) C(1) Pt(1) Ru(4) . . . . 89.7(3) no
  Ru(3) C(1) Pt(1) C(10) . . . . -90.3(3) no
  Ru(3) C(1) Pt(1) C(11) . . . . 89.7(3) no
  Ru(3) C(1) Ru(1) Ru(4) . . . . -89.6(2) no
  Ru(3) C(1) Ru(1) C(14) . . . . -19.0(5) no
  Ru(3) C(1) Ru(1) C(14) . . . 4 -160.1(4) no
  Ru(3) C(1) Ru(1) C(15) . . . . 90.4(2) no
  Ru(3) C(1) Ru(2) C(10) . . . . 94.2(2) no
  Ru(3) C(1) Ru(2) C(18) . . . . -4.6(6) no
  Ru(3) C(1) Ru(2) C(18) . . . 4 -167.0(4) no
  Ru(3) C(1) Ru(3) Ru(4) . . 4 . -87(3) no
  Ru(3) C(1) Ru(3) P(1) . . 4 4 -179(3) no
  Ru(3) C(1) Ru(3) C(16) . . 4 4 -62(3) no
  Ru(3) C(1) Ru(3) C(17) . . 4 4 60(3) no
  Ru(3) C(1) Ru(4) C(12) . . . . -33.0(6) no
  Ru(3) C(1) Ru(4) C(12) . . . 4 -155.5(5) no
  Ru(3) C(1) Ru(4) C(13) . . . . 85.7(2) no
  Ru(4) Pt(1) Ru(2) C(1) . . . . 0.0000(1) no
  Ru(4) Pt(1) Ru(2) C(10) . . . . 180.0000(1) no
  Ru(4) Pt(1) Ru(2) C(18) . . . . 119.2(4) no
  Ru(4) Pt(1) Ru(2) C(18) . . . 4 -119.2(4) no
  Ru(4) Pt(1) Ru(3) P(1) . . . . 126.76(6) no
  Ru(4) Pt(1) Ru(3) C(1) . . . . -56.0(4) no
  Ru(4) Pt(1) Ru(3) C(16) . . . . 43.8(3) no
  Ru(4) Pt(1) Ru(3) C(17) . . . . -151.3(4) no
  Ru(4) Pt(1) Ru(3) P(1) . . 4 4 -126.76(6) no
  Ru(4) Pt(1) Ru(3) C(1) . . 4 . 56.0(4) no
  Ru(4) Pt(1) Ru(3) C(16) . . 4 4 -43.8(3) no
  Ru(4) Pt(1) Ru(3) C(17) . . 4 4 151.3(4) no
  Ru(4) Pt(1) C(10) O(10) . . . . 180.0000(1) no
  Ru(4) Pt(1) C(11) O(11) . . . . 180.0000(1) no
  Ru(4) Ru(1) Ru(2) C(1) . . . . 0.0000(3) no
  Ru(4) Ru(1) Ru(2) C(10) . . . . 0.0000(2) no
  Ru(4) Ru(1) Ru(2) C(18) . . . . -126.4(4) no
  Ru(4) Ru(1) Ru(2) C(18) . . . 4 126.4(4) no
  Ru(4) Ru(1) Ru(3) P(1) . . . . 76.6(4) no
  Ru(4) Ru(1) Ru(3) C(1) . . . . 52.2(3) no
  Ru(4) Ru(1) Ru(3) C(16) . . . . -76.9(3) no
  Ru(4) Ru(1) Ru(3) C(17) . . . . -169.2(3) no
  Ru(4) Ru(1) Ru(3) P(1) . . 4 4 -76.6(4) no
  Ru(4) Ru(1) Ru(3) C(1) . . 4 . -52.2(3) no
  Ru(4) Ru(1) Ru(3) C(16) . . 4 4 76.9(3) no
  Ru(4) Ru(1) Ru(3) C(17) . . 4 4 169.2(3) no
  Ru(4) Ru(1) C(14) O(14) . . . . -161.8(2) no
  Ru(4) Ru(1) C(14) O(14) . . 4 4 161.8(2) no
  Ru(4) Ru(1) C(15) O(15) . . . . 180.0000(1) no
  Ru(4) Ru(3) Pt(1) C(1) . . . . 56.0(4) no
  Ru(4) Ru(3) Pt(1) C(10) . . . . 147.4(2) no
  Ru(4) Ru(3) Pt(1) C(11) . . . . -103.9(6) no
  Ru(4) Ru(3) Ru(1) C(1) . . . . -52.2(3) no
  Ru(4) Ru(3) Ru(1) C(14) . . . . 113.1(3) no
  Ru(4) Ru(3) Ru(1) C(14) . . . 4 32.7(9) no
  Ru(4) Ru(3) Ru(1) C(15) . . . . -152.9(3) no
  Ru(4) Ru(3) Ru(2) C(1) . . . . 3.7(3) no
  Ru(4) Ru(3) Ru(2) C(10) . . . . -88.3(2) no
  Ru(4) Ru(3) Ru(2) C(18) . . . . -179.7(3) no
  Ru(4) Ru(3) Ru(2) C(18) . . . 4 81(2) no
  Ru(4) Ru(3) P(1) C(21) . . . . 104.4(4) no
  Ru(4) Ru(3) P(1) C(22) . . . . -20.3(4) no
  Ru(4) Ru(3) P(1) C(31) . . . . -137.5(3) no
  Ru(4) Ru(3) C(16) O(16) . . . . -111.8(1) no
  Ru(4) Ru(3) C(17) O(17) . . . . 22(10) no
  Ru(4) Ru(3) Pt(1) C(1) . 4 . . -56.0(4) no
  Ru(4) Ru(3) Pt(1) C(10) . 4 . . -147.4(2) no
  Ru(4) Ru(3) Pt(1) C(11) . 4 . . 103.9(6) no
  Ru(4) Ru(3) Ru(1) C(1) . 4 . . 52.2(3) no
  Ru(4) Ru(3) Ru(1) C(14) . 4 . . -32.7(9) no
  Ru(4) Ru(3) Ru(1) C(14) . 4 . 4 -113.1(3) no
  Ru(4) Ru(3) Ru(1) C(15) . 4 . . 152.9(3) no
  Ru(4) Ru(3) Ru(2) C(1) . 4 . . -3.7(3) no
  Ru(4) Ru(3) Ru(2) C(10) . 4 . . 88.3(2) no
  Ru(4) Ru(3) Ru(2) C(18) . 4 . . -81(2) no
  Ru(4) Ru(3) Ru(2) C(18) . 4 . 4 179.7(3) no
  Ru(4) Ru(3) C(16) O(16) . 4 4 4 111.8(1) no
  Ru(4) C(1) Pt(1) C(10) . . . . 180.0000(1) no
  Ru(4) C(1) Pt(1) C(11) . . . . 0.0000(1) no
  Ru(4) C(1) Ru(1) C(14) . . . . 70.5(4) no
  Ru(4) C(1) Ru(1) C(14) . . . 4 -70.5(4) no
  Ru(4) C(1) Ru(1) C(15) . . . . 180.0000(1) no
  Ru(4) C(1) Ru(2) C(10) . . . . 0.0000(1) no
  Ru(4) C(1) Ru(2) C(18) . . . . -98.8(5) no
  Ru(4) C(1) Ru(2) C(18) . . . 4 98.8(5) no
  Ru(4) C(1) Ru(3) P(1) . . . . 92.2(3) no
  Ru(4) C(1) Ru(3) C(16) . . . . -25.0(5) no
  Ru(4) C(1) Ru(3) C(17) . . . . -147.3(3) no
  Ru(4) C(1) Ru(3) P(1) . . 4 4 -92.2(3) no
  Ru(4) C(1) Ru(3) C(16) . . 4 4 25.0(5) no
  Ru(4) C(1) Ru(3) C(17) . . 4 4 147.3(3) no
  P(1) Ru(3) Pt(1) C(1) . . . . -177.2(4) no
  P(1) Ru(3) Pt(1) C(10) . . . . -85.8(2) no
  P(1) Ru(3) Pt(1) C(11) . . . . 22.8(6) no
  P(1) Ru(3) Ru(1) C(1) . . . . 24.4(5) no
  P(1) Ru(3) Ru(1) C(14) . . . . -170.3(5) no
  P(1) Ru(3) Ru(1) C(14) . . . 4 109(1) no
  P(1) Ru(3) Ru(1) C(15) . . . . -76.3(5) no
  P(1) Ru(3) Ru(2) C(1) . . . . 119.5(4) no
  P(1) Ru(3) Ru(2) C(10) . . . . 27.6(2) no
  P(1) Ru(3) Ru(2) C(18) . . . . -63.9(3) no
  P(1) Ru(3) Ru(2) C(18) . . . 4 -163(2) no
  P(1) Ru(3) Ru(4) C(1) . . . . -114.0(3) no
  P(1) Ru(3) Ru(4) C(12) . . . . 40.3(4) no
  P(1) Ru(3) Ru(4) C(12) . . . 4 -35.6(9) no
  P(1) Ru(3) Ru(4) C(13) . . . . 133.9(4) no
  P(1) Ru(3) C(16) O(16) . . . . 133.0(1) no
  P(1) Ru(3) C(17) O(17) . . . . -145(9) no
  P(1) C(31) C(32) C(33) . . . . 174.5(7) no
  P(1) C(31) C(36) C(35) . . . . -174.1(8) no
  O(10) C(10) Pt(1) C(1) . . . . 180.0000(1) no
  O(10) C(10) Pt(1) C(11) . . . . 0.0000(1) no
  O(10) C(10) Ru(2) C(1) . . . . 180.0000(2) no
  O(10) C(10) Ru(2) C(18) . . . . -47.6(3) no
  O(10) C(10) Ru(2) C(18) . . . 4 47.6(3) no
  O(11) C(11) Pt(1) C(1) . . . . 180.0000(1) no
  O(11) C(11) Pt(1) C(10) . . . . 0.0000(3) no
  O(12) C(12) Ru(4) C(1) . . . . -147.9(2) no
  O(12) C(12) Ru(4) C(12) . . . 4 -10.0(2) no
  O(12) C(12) Ru(4) C(13) . . . . 84.1(2) no
  O(13) C(13) Ru(4) C(1) . . . . 180.0000 no
  O(13) C(13) Ru(4) C(12) . . . . -44.2(3) no
  O(13) C(13) Ru(4) C(12) . . . 4 44.2(3) no
  O(14) C(14) Ru(1) C(1) . . . . 155.8(2) no
  O(14) C(14) Ru(1) C(14) . . . 4 -53.3(2) no
  O(14) C(14) Ru(1) C(15) . . . . 42.1(2) no
  O(15) C(15) Ru(1) C(1) . . . . 180.0000(2) no
  O(15) C(15) Ru(1) C(14) . . . . -47.1(3) no
  O(15) C(15) Ru(1) C(14) . . . 4 47.1(3) no
  O(16) C(16) Ru(3) C(1) . . . . -94.5(1) no
  O(16) C(16) Ru(3) C(17) . . . . 42.2(1) no
  O(17) C(17) Ru(3) C(1) . . . . 80(9) no
  O(17) C(17) Ru(3) C(16) . . . . -55(9) no
  O(18) C(18) Ru(2) C(1) . . . . 138.5(3) no
  O(18) C(18) Ru(2) C(10) . . . . 37.5(3) no
  O(18) C(18) Ru(2) C(18) . . . 4 -54.6(3) no
  C(1) Pt(1) Ru(2) C(10) . . . . 180.0000 no
  C(1) Pt(1) Ru(2) C(18) . . . . 119.2(4) no
  C(1) Pt(1) Ru(2) C(18) . . . 4 -119.2(4) no
  C(1) Pt(1) Ru(3) C(16) . . . . 99.8(5) no
  C(1) Pt(1) Ru(3) C(17) . . . . -95.2(5) no
  C(1) Pt(1) Ru(3) C(16) . . 4 4 -99.8(5) no
  C(1) Pt(1) Ru(3) C(17) . . 4 4 95.2(5) no
  C(1) Pt(1) Ru(4) C(12) . . . . -135.3(3) no
  C(1) Pt(1) Ru(4) C(12) . . . 4 135.3(3) no
  C(1) Pt(1) Ru(4) C(13) . . . . 0.0000(1) no
  C(1) Ru(1) Ru(2) C(10) . . . . 0.0000(1) no
  C(1) Ru(1) Ru(2) C(18) . . . . -126.4(4) no
  C(1) Ru(1) Ru(2) C(18) . . . 4 126.4(4) no
  C(1) Ru(1) Ru(3) C(16) . . . . -129.1(4) no
  C(1) Ru(1) Ru(3) C(17) . . . . 138.6(4) no
  C(1) Ru(1) Ru(3) C(16) . . 4 4 129.1(4) no
  C(1) Ru(1) Ru(3) C(17) . . 4 4 -138.6(4) no
  C(1) Ru(1) Ru(4) C(12) . . . . 101.9(5) no
  C(1) Ru(1) Ru(4) C(12) . . . 4 -101.9(5) no
  C(1) Ru(1) Ru(4) C(13) . . . . 180.0000 no
  C(1) Ru(2) Pt(1) C(10) . . . . 180.0000 no
  C(1) Ru(2) Pt(1) C(11) . . . . 180.0000 no
  C(1) Ru(2) Ru(1) C(14) . . . . 108.8(4) no
  C(1) Ru(2) Ru(1) C(14) . . . 4 -108.8(4) no
  C(1) Ru(2) Ru(1) C(15) . . . . 180.0000(1) no
  C(1) Ru(2) Ru(3) C(16) . . . . -58.4(9) no
  C(1) Ru(2) Ru(3) C(17) . . . . -150.0(4) no
  C(1) Ru(2) Ru(3) C(16) . . 4 4 58.4(9) no
  C(1) Ru(2) Ru(3) C(17) . . 4 4 150.0(4) no
  C(1) Ru(3) Pt(1) C(10) . . . . 91.4(4) no
  C(1) Ru(3) Pt(1) C(11) . . . . -159.9(7) no
  C(1) Ru(3) Ru(1) C(14) . . . . 165.3(4) no
  C(1) Ru(3) Ru(1) C(14) . . . 4 85(1) no
  C(1) Ru(3) Ru(1) C(15) . . . . -100.7(4) no
  C(1) Ru(3) Ru(2) C(10) . . . . -92.0(4) no
  C(1) Ru(3) Ru(2) C(18) . . . . 176.6(5) no
  C(1) Ru(3) Ru(2) C(18) . . . 4 77(2) no
  C(1) Ru(3) Ru(4) C(12) . . . . 154.3(5) no
  C(1) Ru(3) Ru(4) C(12) . . . 4 78(1) no
  C(1) Ru(3) Ru(4) C(13) . . . . -112.1(5) no
  C(1) Ru(3) P(1) C(21) . . . . 53.9(5) no
  C(1) Ru(3) P(1) C(22) . . . . -70.8(5) no
  C(1) Ru(3) P(1) C(31) . . . . 172.0(4) no
  C(1) Ru(3) Pt(1) C(10) . 4 . . -91.4(4) no
  C(1) Ru(3) Pt(1) C(11) . 4 . . 159.9(7) no
  C(1) Ru(3) Ru(1) C(14) . 4 . . -85(1) no
  C(1) Ru(3) Ru(1) C(14) . 4 . 4 -165.3(4) no
  C(1) Ru(3) Ru(1) C(15) . 4 . . 100.7(4) no
  C(1) Ru(3) Ru(2) C(10) . 4 . . 92.0(4) no
  C(1) Ru(3) Ru(2) C(18) . 4 . . -77(2) no
  C(1) Ru(3) Ru(2) C(18) . 4 . 4 -176.6(5) no
  C(1) Ru(3) Ru(4) C(12) . 4 . . -78(1) no
  C(1) Ru(3) Ru(4) C(12) . 4 . 4 -154.3(5) no
  C(1) Ru(3) Ru(4) C(13) . 4 . . 112.1(5) no
  C(1) Ru(4) Pt(1) C(10) . . . . 0.0000(1) no
  C(1) Ru(4) Pt(1) C(11) . . . . 180.0000(1) no
  C(1) Ru(4) Ru(1) C(14) . . . . -130.5(3) no
  C(1) Ru(4) Ru(1) C(14) . . . 4 130.5(3) no
  C(1) Ru(4) Ru(1) C(15) . . . . 0.0000(2) no
  C(1) Ru(4) Ru(3) C(16) . . . . 159.3(4) no
  C(1) Ru(4) Ru(3) C(17) . . . . 80.0(7) no
  C(1) Ru(4) Ru(3) C(16) . . 4 4 -159.3(4) no
  C(1) Ru(4) Ru(3) C(17) . . 4 4 -80.0(7) no
  C(10) Pt(1) Ru(2) C(18) . . . . -60.8(4) no
  C(10) Pt(1) Ru(2) C(18) . . . 4 60.8(4) no
  C(10) Pt(1) Ru(3) C(16) . . . . -168.8(4) no
  C(10) Pt(1) Ru(3) C(17) . . . . -3.8(4) no
  C(10) Pt(1) Ru(3) C(16) . . 4 4 168.8(4) no
  C(10) Pt(1) Ru(3) C(17) . . 4 4 3.8(4) no
  C(10) Pt(1) Ru(4) C(12) . . . . -135.3(3) no
  C(10) Pt(1) Ru(4) C(12) . . . 4 135.3(3) no
  C(10) Pt(1) Ru(4) C(13) . . . . 0.0000(1) no
  C(10) Ru(2) Pt(1) C(11) . . . . 0.0000 no
  C(10) Ru(2) Ru(1) C(14) . . . . 108.8(4) no
  C(10) Ru(2) Ru(1) C(14) . . . 4 -108.8(4) no
  C(10) Ru(2) Ru(1) C(15) . . . . 180.0000 no
  C(10) Ru(2) Ru(3) C(16) . . . . -150.3(9) no
  C(10) Ru(2) Ru(3) C(17) . . . . 118.0(3) no
  C(10) Ru(2) Ru(3) C(16) . . 4 4 150.3(9) no
  C(10) Ru(2) Ru(3) C(17) . . 4 4 -118.0(3) no
  C(11) Pt(1) Ru(2) C(18) . . . . -60.8(4) no
  C(11) Pt(1) Ru(2) C(18) . . . 4 60.8(4) no
  C(11) Pt(1) Ru(3) C(16) . . . . -60.2(6) no
  C(11) Pt(1) Ru(3) C(17) . . . . 104.8(7) no
  C(11) Pt(1) Ru(3) C(16) . . 4 4 60.2(6) no
  C(11) Pt(1) Ru(3) C(17) . . 4 4 -104.8(7) no
  C(11) Pt(1) Ru(4) C(12) . . . . 44.7(3) no
  C(11) Pt(1) Ru(4) C(12) . . . 4 -44.7(3) no
  C(11) Pt(1) Ru(4) C(13) . . . . 180.0000(2) no
  C(12) Ru(4) Ru(1) C(14) . . . . -28.5(5) no
  C(12) Ru(4) Ru(1) C(14) . . . 4 -127.6(6) no
  C(12) Ru(4) Ru(1) C(15) . . . . 101.9(5) no
  C(12) Ru(4) Ru(3) C(16) . . . . -46.3(5) no
  C(12) Ru(4) Ru(3) C(17) . . . . -125.7(7) no
  C(12) Ru(4) Ru(3) C(16) . . 4 4 122(1) no
  C(12) Ru(4) Ru(3) C(17) . . 4 4 -158(1) no
  C(13) Ru(4) Ru(1) C(14) . . . . 49.5(3) no
  C(13) Ru(4) Ru(1) C(14) . . . 4 -49.5(3) no
  C(13) Ru(4) Ru(1) C(15) . . . . 180.0000(1) no
  C(13) Ru(4) Ru(3) C(16) . . . . 47.2(5) no
  C(13) Ru(4) Ru(3) C(17) . . . . -32.2(7) no
  C(13) Ru(4) Ru(3) C(16) . . 4 4 -47.2(5) no
  C(13) Ru(4) Ru(3) C(17) . . 4 4 32.2(7) no
  C(14) Ru(1) Ru(2) C(18) . . . . -17.6(5) no
  C(14) Ru(1) Ru(2) C(18) . . . 4 -124.8(5) no
  C(14) Ru(1) Ru(3) C(16) . . . . 36.2(4) no
  C(14) Ru(1) Ru(3) C(17) . . . . -56.1(4) no
  C(14) Ru(1) Ru(3) C(16) . . 4 4 44(1) no
  C(14) Ru(1) Ru(3) C(17) . . 4 4 137(1) no
  C(15) Ru(1) Ru(2) C(18) . . . . 53.6(4) no
  C(15) Ru(1) Ru(2) C(18) . . . 4 -53.6(4) no
  C(15) Ru(1) Ru(3) C(16) . . . . 130.2(4) no
  C(15) Ru(1) Ru(3) C(17) . . . . 37.9(4) no
  C(15) Ru(1) Ru(3) C(16) . . 4 4 -130.2(4) no
  C(15) Ru(1) Ru(3) C(17) . . 4 4 -37.9(4) no
  C(16) Ru(3) Ru(2) C(18) . . . . 118.2(9) no
  C(16) Ru(3) Ru(2) C(18) . . . 4 19(2) no
  C(16) Ru(3) P(1) C(21) . . . . -173.5(5) no
  C(16) Ru(3) P(1) C(22) . . . . 61.8(5) no
  C(16) Ru(3) P(1) C(31) . . . . -55.5(4) no
  C(17) Ru(3) Ru(2) C(18) . . . . 26.5(4) no
  C(17) Ru(3) Ru(2) C(18) . . . 4 -73(2) no
  C(17) Ru(3) P(1) C(21) . . . . -81.7(5) no
  C(17) Ru(3) P(1) C(22) . . . . 153.6(5) no
  C(17) Ru(3) P(1) C(31) . . . . 36.3(4) no
  C(21) P(1) C(31) C(32) . . . . 34.2(8) no
  C(21) P(1) C(31) C(36) . . . . -152.3(8) no
  C(22) P(1) C(31) C(32) . . . . 141.8(8) no
  C(22) P(1) C(31) C(36) . . . . -44.7(8) no
  C(31) C(32) C(33) C(34) . . . . -1(2) no
  C(31) C(36) C(35) C(34) . . . . 0(2) no
  C(32) C(31) C(36) C(35) . . . . 0(2) no
  C(32) C(33) C(34) C(35) . . . . 0(2) no
  C(33) C(32) C(31) C(36) . . . . 1(1) no
  C(33) C(34) C(35) C(36) . . . . 0(2) no

#===END

Compound 6.
data_fume2spt
 
_audit_creation_method            SHELXL-97
_chemical_name_systematic
;
  ?
;
_chemical_name_common             ?
_chemical_melting_point           ?
_chemical_formula_moiety          ?
_chemical_formula_sum
  'C36 H12 O30 Pt2 Ru10 S2'
_chemical_formula_weight          2389.46
 
loop_
  _atom_type_symbol
  _atom_type_description
  _atom_type_scat_dispersion_real
  _atom_type_scat_dispersion_imag
  _atom_type_scat_source
  'C'  'C'   0.0033   0.0016
  'International Tables Vol C Tables 4.2.6.8 and 6.1.1.4'
  'H'  'H'   0.0000   0.0000
  'International Tables Vol C Tables 4.2.6.8 and 6.1.1.4'
  'O'  'O'   0.0106   0.0060
  'International Tables Vol C Tables 4.2.6.8 and 6.1.1.4'
  'S'  'S'   0.1246   0.1234
  'International Tables Vol C Tables 4.2.6.8 and 6.1.1.4'
  'Ru'  'Ru'  -1.2594   0.8363
  'International Tables Vol C Tables 4.2.6.8 and 6.1.1.4'
  'Pt'  'Pt'  -1.7033   8.3905
  'International Tables Vol C Tables 4.2.6.8 and 6.1.1.4'
 
_symmetry_cell_setting            Monoclinic
_symmetry_space_group_name_H-M    P2(1)/c
 
loop_
  _symmetry_equiv_pos_as_xyz
  'x, y, z'
  '-x, y+1/2, -z+1/2'
  '-x, -y, -z'
  'x, -y-1/2, z-1/2'
 
_cell_length_a                    18.820(2)
_cell_length_b                    17.652(2)
_cell_length_c                    18.756(2)
_cell_angle_alpha                 90.00
_cell_angle_beta                  114.952(2)
_cell_angle_gamma                 90.00
_cell_volume                      5649.4(12)
_cell_formula_units_Z             4
_cell_measurement_temperature     296(2)
_cell_measurement_reflns_used     5698
_cell_measurement_theta_min       2.31
_cell_measurement_theta_max       25.91
 
_exptl_crystal_description        Prism
_exptl_crystal_colour             Red
_exptl_crystal_size_max           0.2
_exptl_crystal_size_mid           0.1
_exptl_crystal_size_min           0.06
_exptl_crystal_density_meas       ?
_exptl_crystal_density_diffrn     2.809
_exptl_crystal_density_method     'not measured'
_exptl_crystal_F_000              4384
_exptl_absorpt_coefficient_mu     7.679
_exptl_absorpt_correction_type    SADABS
_exptl_absorpt_correction_T_min   0.602
_exptl_absorpt_correction_T_max   1.0
_exptl_absorpt_process_details    '(SADABS, Bruker, 1997)'
 
_exptl_special_details
;
  ?
;
 
_diffrn_ambient_temperature       296(2)
_diffrn_radiation_wavelength      0.71073
_diffrn_radiation_type            MoK\a
_diffrn_radiation_source          'fine-focus sealed tube'
_diffrn_radiation_monochromator   graphite
_diffrn_measurement_device_type   'Bruker SMART APEX CCD diffractometer'
_diffrn_measurement_method        'omega scans'
_diffrn_detector_area_resol_mean  ?
_diffrn_standards_number          ?
_diffrn_standards_interval_count  ?
_diffrn_standards_interval_time   ?
_diffrn_standards_decay_%         <1
_diffrn_reflns_number             36476
_diffrn_reflns_av_R_equivalents   0.0292
_diffrn_reflns_av_sigmaI/netI     0.0331
_diffrn_reflns_limit_h_min        -23
_diffrn_reflns_limit_h_max        20
_diffrn_reflns_limit_k_min        -21
_diffrn_reflns_limit_k_max        21
_diffrn_reflns_limit_l_min        -23
_diffrn_reflns_limit_l_max        23
_diffrn_reflns_theta_min          1.66
_diffrn_reflns_theta_max          26.07
_reflns_number_total              11152
_reflns_number_gt                 9524
_reflns_threshold_expression      >2sigma(I)
 
_computing_data_collection        'SMART NT V5.619 (Bruker, 2000)'
_computing_cell_refinement        'SAINT+ NT V6.02a (Bruker, 1998)'
_computing_data_reduction         'SAINT+ NT V6.02a'
_computing_structure_solution     'SHELXS-97 (Sheldrick, 1990)'
_computing_structure_refinement   'SHELXL-97 (Sheldrick, 1997)'
_computing_molecular_graphics     'SHELXTL V6.1 (Sheldrick, 2000)'
_computing_publication_material   'SHELXTL V6.1'
 
_refine_special_details
;
  Refinement of F^2^ against ALL reflections.  The weighted R-factor wR and
  goodness of fit S are based on F^2^, conventional R-factors R are based
  on F, with F set to zero for negative F^2^. The threshold expression of
  F^2^ > 2sigma(F^2^) is used only for calculating R-factors(gt) etc. and is
  not relevant to the choice of reflections for refinement.  R-factors based
  on F^2^ are statistically about twice as large as those based on F, and R-
  factors based on ALL data will be even larger.
;
 
_refine_ls_structure_factor_coef  Fsqd
_refine_ls_matrix_type            full
_refine_ls_weighting_scheme       calc
_refine_ls_weighting_details
  'calc w=1/[\s^2^(Fo^2^)+(0.0254P)^2^+0.0000P] where P=(Fo^2^+2Fc^2^)/3'
_atom_sites_solution_primary      direct
_atom_sites_solution_secondary    difmap
_atom_sites_solution_hydrogens    geom
_refine_ls_hydrogen_treatment     mixed
_refine_ls_extinction_method      none
_refine_ls_extinction_coef        ?
_refine_ls_number_reflns          11152
_refine_ls_number_parameters      725
_refine_ls_number_restraints      0
_refine_ls_R_factor_all           0.0325
_refine_ls_R_factor_gt            0.0249
_refine_ls_wR_factor_ref          0.0576
_refine_ls_wR_factor_gt           0.0548
_refine_ls_goodness_of_fit_ref    1.026
_refine_ls_restrained_S_all       1.026
_refine_ls_shift/su_max           0.002
_refine_ls_shift/su_mean          0.000
 
loop_
  _atom_site_label
  _atom_site_type_symbol
  _atom_site_fract_x
  _atom_site_fract_y
  _atom_site_fract_z
  _atom_site_U_iso_or_equiv
  _atom_site_adp_type
  _atom_site_occupancy
  _atom_site_symmetry_multiplicity
  _atom_site_calc_flag
  _atom_site_refinement_flags
  _atom_site_disorder_assembly
  _atom_site_disorder_group
Pt1 Pt 0.110326(11) 0.180913(9) 0.122940(10) 0.04106(5) Uani 1 1 d . . .
Pt2 Pt 0.629808(11) 0.177010(10) 0.638754(10) 0.04288(5) Uani 1 1 d . . .
Ru1 Ru 0.14551(2) 0.385687(18) 0.043177(19) 0.03443(8) Uani 1 1 d . . .
Ru2 Ru 0.24803(2) 0.28625(2) 0.159007(19) 0.03804(8) Uani 1 1 d . . .
Ru3 Ru 0.10145(2) 0.327327(18) 0.167845(19) 0.03517(8) Uani 1 1 d . . .
Ru4 Ru 0.016180(19) 0.286188(19) -0.001225(19) 0.03608(8) Uani 1 1 d . . .
Ru5 Ru 0.16210(2) 0.230236(19) 0.003277(19) 0.03643(8) Uani 1 1 d . . .
Ru6 Ru 0.63308(2) 0.364804(19) 0.51403(2) 0.04018(9) Uani 1 1 d . . .
Ru7 Ru 0.74963(2) 0.292896(19) 0.645611(19) 0.03743(8) Uani 1 1 d . . .
Ru8 Ru 0.60056(2) 0.32775(2) 0.65109(2) 0.04338(9) Uani 1 1 d . . .
Ru9 Ru 0.51864(2) 0.25322(2) 0.49610(2) 0.04353(9) Uani 1 1 d . . .
Ru10 Ru 0.66931(2) 0.20499(2) 0.505916(19) 0.03626(8) Uani 1 1 d . . .
S1 S 0.09558(12) 0.05478(8) 0.14256(10) 0.0884(5) Uani 1 1 d . . .
S2 S 0.64497(11) 0.05803(8) 0.69271(9) 0.0747(4) Uani 1 1 d . . .
O11 O 0.0826(3) 0.5156(2) 0.1049(2) 0.0785(12) Uani 1 1 d . . .
O12 O 0.3009(2) 0.4640(2) 0.0774(3) 0.0864(13) Uani 1 1 d . . .
O13 O 0.0746(2) 0.4518(2) -0.1218(2) 0.0766(11) Uani 1 1 d . . .
O21 O 0.3360(3) 0.3994(3) 0.2878(3) 0.121(2) Uani 1 1 d . . .
O22 O 0.3883(2) 0.2805(3) 0.1203(2) 0.0871(13) Uani 1 1 d . . .
O23 O 0.3036(3) 0.1475(3) 0.2646(3) 0.1156(19) Uani 1 1 d . . .
O31 O -0.0417(2) 0.3878(2) 0.1839(2) 0.0765(12) Uani 1 1 d . . .
O32 O 0.1955(2) 0.3909(2) 0.3304(2) 0.0836(13) Uani 1 1 d . . .
O33 O 0.0754(2) 0.20002(19) 0.2628(2) 0.0682(11) Uani 1 1 d . . .
O41 O -0.0484(2) 0.3216(2) -0.17557(19) 0.0669(10) Uani 1 1 d . . .
O42 O -0.1161(2) 0.3800(2) 0.0053(2) 0.0666(10) Uani 1 1 d . . .
O43 O -0.0776(2) 0.1397(2) -0.0311(2) 0.0782(12) Uani 1 1 d . . .
O51 O 0.2543(3) 0.3021(2) -0.0790(3) 0.0901(14) Uani 1 1 d . . .
O52 O 0.0455(2) 0.1515(2) -0.1430(2) 0.0766(12) Uani 1 1 d . . .
O53 O 0.2607(3) 0.0873(2) 0.0601(3) 0.0965(15) Uani 1 1 d . . .
O61 O 0.5861(3) 0.5082(2) 0.5715(2) 0.0885(14) Uani 1 1 d . . .
O62 O 0.7775(3) 0.4372(3) 0.5085(3) 0.1099(18) Uani 1 1 d . . .
O63 O 0.5224(2) 0.4133(2) 0.3487(2) 0.0861(13) Uani 1 1 d . . .
O71 O 0.8188(3) 0.4403(2) 0.7289(3) 0.0990(15) Uani 1 1 d . . .
O72 O 0.8899(2) 0.2785(3) 0.6078(2) 0.0809(12) Uani 1 1 d . . .
O73 O 0.8280(3) 0.1874(2) 0.7851(2) 0.0918(14) Uani 1 1 d . . .
O81 O 0.4564(3) 0.3971(3) 0.6576(3) 0.1049(16) Uani 1 1 d . . .
O82 O 0.6962(3) 0.4141(3) 0.7997(3) 0.1178(19) Uani 1 1 d . . .
O83 O 0.5836(3) 0.2186(2) 0.7674(2) 0.0761(11) Uani 1 1 d . . .
O91 O 0.4505(2) 0.2439(3) 0.3181(2) 0.0968(15) Uani 1 1 d . . .
O92 O 0.3752(2) 0.3412(3) 0.4837(3) 0.0887(13) Uani 1 1 d . . .
O93 O 0.4432(3) 0.1042(3) 0.5059(3) 0.1104(17) Uani 1 1 d . . .
O101 O 0.7639(2) 0.2587(2) 0.4179(2) 0.0796(12) Uani 1 1 d . . .
O102 O 0.5703(2) 0.1089(3) 0.3650(2) 0.0917(14) Uani 1 1 d . . .
O103 O 0.7679(3) 0.0675(2) 0.5865(2) 0.0826(12) Uani 1 1 d . . .
C1 C 0.1305(2) 0.2821(2) 0.0833(2) 0.0316(8) Uani 1 1 d . . .
C2 C 0.6333(2) 0.2688(2) 0.5755(2) 0.0340(9) Uani 1 1 d . . .
C5 C 0.6897(4) 0.0643(4) 0.7980(3) 0.099(2) Uani 1 1 d . . .
H5A H 0.6572 0.0941 0.8152 0.149 Uiso 1 1 calc R . .
H5B H 0.7402 0.0879 0.8151 0.149 Uiso 1 1 calc R . .
H5C H 0.6958 0.0144 0.8201 0.149 Uiso 1 1 calc R . .
C3 C 0.1513(5) 0.0318(4) 0.2432(4) 0.115(3) Uani 1 1 d . . .
H3A H 0.1393 0.0670 0.2755 0.172 Uiso 1 1 calc R . .
H3B H 0.2061 0.0347 0.2553 0.172 Uiso 1 1 calc R . .
H3C H 0.1386 -0.0186 0.2531 0.172 Uiso 1 1 calc R . .
C4 C 0.0004(4) 0.0417(4) 0.1423(6) 0.172(5) Uani 1 1 d . . .
H4A H -0.0013 -0.0066 0.1651 0.257 Uiso 1 1 calc R . .
H4B H -0.0391 0.0434 0.0892 0.257 Uiso 1 1 calc R . .
H4C H -0.0089 0.0812 0.1724 0.257 Uiso 1 1 calc R . .
C6 C 0.5501(5) 0.0270(4) 0.6819(4) 0.146(4) Uani 1 1 d . . .
H6A H 0.5560 -0.0154 0.7161 0.219 Uiso 1 1 calc R . .
H6B H 0.5194 0.0122 0.6284 0.219 Uiso 1 1 calc R . .
H6C H 0.5243 0.0677 0.6956 0.219 Uiso 1 1 calc R . .
C11 C 0.1063(3) 0.4622(3) 0.0886(3) 0.0516(12) Uani 1 1 d . . .
C12 C 0.2449(3) 0.4332(3) 0.0672(3) 0.0571(13) Uani 1 1 d . . .
C13 C 0.0998(3) 0.4267(3) -0.0602(3) 0.0495(11) Uani 1 1 d . . .
C21 C 0.3013(3) 0.3567(3) 0.2416(3) 0.0678(15) Uani 1 1 d . . .
C22 C 0.3360(3) 0.2814(3) 0.1340(3) 0.0525(12) Uani 1 1 d . . .
C23 C 0.2783(3) 0.1977(3) 0.2239(3) 0.0697(16) Uani 1 1 d . . .
C31 C 0.0110(3) 0.3665(3) 0.1755(3) 0.0502(12) Uani 1 1 d . . .
C32 C 0.1617(3) 0.3686(3) 0.2690(3) 0.0535(12) Uani 1 1 d . . .
C33 C 0.0876(3) 0.2255(2) 0.2120(3) 0.0448(11) Uani 1 1 d . . .
C41 C -0.0235(3) 0.3079(3) -0.1102(3) 0.0470(11) Uani 1 1 d . . .
C42 C -0.0651(3) 0.3454(3) 0.0058(3) 0.0494(11) Uani 1 1 d . . .
C43 C -0.0395(3) 0.1921(3) -0.0151(3) 0.0527(12) Uani 1 1 d . . .
C51 C 0.2194(3) 0.2776(3) -0.0483(3) 0.0566(13) Uani 1 1 d . . .
C52 C 0.0883(3) 0.1835(3) -0.0894(3) 0.0536(12) Uani 1 1 d . . .
C53 C 0.2227(3) 0.1403(3) 0.0388(3) 0.0615(14) Uani 1 1 d . . .
C61 C 0.6036(3) 0.4507(3) 0.5576(3) 0.0592(13) Uani 1 1 d . . .
C62 C 0.7245(3) 0.4098(3) 0.5114(3) 0.0680(15) Uani 1 1 d . . .
C63 C 0.5625(3) 0.3931(3) 0.4095(3) 0.0575(13) Uani 1 1 d . . .
C71 C 0.7924(3) 0.3848(3) 0.7007(3) 0.0622(14) Uani 1 1 d . . .
C72 C 0.8366(3) 0.2824(3) 0.6206(3) 0.0516(12) Uani 1 1 d . . .
C73 C 0.7943(3) 0.2243(3) 0.7323(3) 0.0569(13) Uani 1 1 d . . .
C81 C 0.5089(3) 0.3706(3) 0.6529(3) 0.0649(14) Uani 1 1 d . . .
C82 C 0.6612(4) 0.3833(3) 0.7433(3) 0.0718(16) Uani 1 1 d . . .
C83 C 0.5963(3) 0.2357(3) 0.7142(3) 0.0543(12) Uani 1 1 d . . .
C91 C 0.4769(3) 0.2470(3) 0.3853(3) 0.0645(15) Uani 1 1 d . . .
C92 C 0.4304(3) 0.3096(3) 0.4910(3) 0.0594(13) Uani 1 1 d . . .
C93 C 0.4757(3) 0.1583(3) 0.5069(4) 0.0726(16) Uani 1 1 d . . .
C101 C 0.7286(3) 0.2404(3) 0.4513(3) 0.0523(12) Uani 1 1 d . . .
C102 C 0.6055(3) 0.1462(3) 0.4171(3) 0.0590(13) Uani 1 1 d . . .
C103 C 0.7295(3) 0.1189(3) 0.5584(3) 0.0527(12) Uani 1 1 d . . .
 
loop_
  _atom_site_aniso_label
  _atom_site_aniso_U_11
  _atom_site_aniso_U_22
  _atom_site_aniso_U_33
  _atom_site_aniso_U_23
  _atom_site_aniso_U_13
  _atom_site_aniso_U_12
Pt1 0.05482(12) 0.03197(9) 0.04007(10) 0.00389(7) 0.02360(9) 0.00081(7)
Pt2 0.05448(12) 0.03906(10) 0.04021(10) 0.00208(7) 0.02496(9) -0.00182(8)
Ru1 0.03987(19) 0.03126(17) 0.03304(17) 0.00168(13) 0.01623(15) 0.00005(14)
Ru2 0.03226(19) 0.0441(2) 0.03259(18) -0.00019(14) 0.00864(15) 0.00358(15)
Ru3 0.0419(2) 0.03581(18) 0.03074(17) 0.00118(13) 0.01815(15) 0.00367(14)
Ru4 0.03131(18) 0.04284(19) 0.03070(17) 0.00264(14) 0.00979(14) -0.00065(14)
Ru5 0.0422(2) 0.03698(18) 0.03315(18) -0.00421(14) 0.01885(16) -0.00010(15)
Ru6 0.0418(2) 0.03914(19) 0.03964(19) 0.00700(15) 0.01716(16) 0.00441(15)
Ru7 0.03390(19) 0.04034(18) 0.03367(18) -0.00209(14) 0.01000(15) -0.00162(15)
Ru8 0.0494(2) 0.0436(2) 0.0435(2) -0.00361(15) 0.02577(18) 0.00319(16)
Ru9 0.03027(19) 0.0558(2) 0.0412(2) 0.00195(16) 0.01187(16) -0.00036(16)
Ru10 0.03569(19) 0.04188(19) 0.03133(17) -0.00235(14) 0.01425(15) 0.00027(15)
S1 0.1468(17) 0.0394(7) 0.0932(12) 0.0096(7) 0.0644(12) -0.0038(9)
S2 0.1183(14) 0.0471(7) 0.0695(9) 0.0092(6) 0.0502(9) -0.0021(8)
O11 0.125(4) 0.049(2) 0.083(3) 0.0047(19) 0.064(3) 0.023(2)
O12 0.062(3) 0.083(3) 0.115(3) 0.000(2) 0.038(3) -0.029(2)
O13 0.095(3) 0.078(3) 0.047(2) 0.0200(19) 0.021(2) -0.001(2)
O21 0.071(3) 0.162(5) 0.107(4) -0.089(4) 0.015(3) -0.027(3)
O22 0.054(3) 0.125(4) 0.093(3) -0.013(3) 0.041(2) 0.003(2)
O23 0.080(3) 0.097(3) 0.132(4) 0.071(3) 0.008(3) 0.014(3)
O31 0.072(3) 0.106(3) 0.063(2) 0.011(2) 0.040(2) 0.038(2)
O32 0.092(3) 0.109(3) 0.048(2) -0.030(2) 0.028(2) -0.024(3)
O33 0.106(3) 0.056(2) 0.067(2) 0.0159(18) 0.061(2) 0.009(2)
O41 0.057(2) 0.097(3) 0.0360(19) 0.0071(18) 0.0090(17) -0.0033(19)
O42 0.054(2) 0.077(3) 0.073(2) 0.0111(19) 0.031(2) 0.0188(19)
O43 0.070(3) 0.064(2) 0.088(3) -0.004(2) 0.021(2) -0.027(2)
O51 0.099(3) 0.107(3) 0.094(3) 0.006(3) 0.069(3) -0.016(3)
O52 0.082(3) 0.090(3) 0.056(2) -0.036(2) 0.027(2) -0.024(2)
O53 0.118(4) 0.057(2) 0.107(3) 0.004(2) 0.040(3) 0.035(3)
O61 0.131(4) 0.050(2) 0.082(3) -0.007(2) 0.042(3) 0.024(2)
O62 0.066(3) 0.096(3) 0.168(5) 0.065(3) 0.049(3) -0.001(2)
O63 0.086(3) 0.118(3) 0.047(2) 0.027(2) 0.021(2) 0.033(3)
O71 0.097(3) 0.066(3) 0.106(3) -0.034(2) 0.016(3) -0.018(2)
O72 0.048(2) 0.113(3) 0.089(3) -0.006(2) 0.036(2) 0.002(2)
O73 0.076(3) 0.105(3) 0.065(3) 0.040(2) 0.000(2) -0.003(2)
O81 0.078(3) 0.122(4) 0.129(4) -0.025(3) 0.057(3) 0.024(3)
O82 0.129(4) 0.140(4) 0.089(3) -0.071(3) 0.051(3) -0.037(4)
O83 0.111(3) 0.078(3) 0.069(3) 0.012(2) 0.067(3) 0.009(2)
O91 0.058(3) 0.168(5) 0.044(2) -0.003(2) 0.002(2) 0.008(3)
O92 0.054(3) 0.110(3) 0.109(4) 0.020(3) 0.042(3) 0.028(2)
O93 0.080(3) 0.083(3) 0.151(5) 0.013(3) 0.031(3) -0.032(3)
O101 0.079(3) 0.105(3) 0.074(3) 0.009(2) 0.051(2) -0.012(2)
O102 0.070(3) 0.111(3) 0.076(3) -0.045(3) 0.014(2) -0.020(2)
O103 0.094(3) 0.071(3) 0.083(3) 0.019(2) 0.037(2) 0.038(2)
C1 0.035(2) 0.035(2) 0.0260(19) -0.0003(16) 0.0135(17) 0.0002(17)
C2 0.032(2) 0.036(2) 0.034(2) 0.0000(17) 0.0147(18) 0.0000(17)
C5 0.125(6) 0.098(5) 0.067(4) 0.033(4) 0.034(4) 0.014(4)
C3 0.140(7) 0.091(5) 0.130(6) 0.064(5) 0.075(6) 0.040(5)
C4 0.100(7) 0.120(7) 0.241(11) 0.090(7) 0.019(7) -0.044(5)
C6 0.157(8) 0.143(7) 0.108(6) 0.027(5) 0.028(6) -0.085(6)
C11 0.066(3) 0.041(3) 0.051(3) 0.002(2) 0.028(3) 0.003(2)
C12 0.059(3) 0.045(3) 0.067(3) 0.001(2) 0.026(3) -0.005(2)
C13 0.058(3) 0.043(3) 0.047(3) 0.002(2) 0.023(2) -0.003(2)
C21 0.044(3) 0.092(4) 0.059(3) -0.023(3) 0.012(3) -0.003(3)
C22 0.041(3) 0.063(3) 0.054(3) -0.002(2) 0.021(2) 0.004(2)
C23 0.053(3) 0.071(4) 0.073(4) 0.021(3) 0.016(3) 0.008(3)
C31 0.056(3) 0.058(3) 0.037(2) 0.011(2) 0.020(2) 0.018(2)
C32 0.062(3) 0.060(3) 0.045(3) -0.006(2) 0.030(3) -0.003(2)
C33 0.050(3) 0.047(3) 0.043(3) 0.008(2) 0.025(2) 0.003(2)
C41 0.035(2) 0.063(3) 0.037(3) 0.004(2) 0.008(2) -0.001(2)
C42 0.042(3) 0.062(3) 0.042(3) 0.003(2) 0.016(2) 0.000(2)
C43 0.053(3) 0.056(3) 0.051(3) 0.005(2) 0.024(2) -0.001(2)
C51 0.058(3) 0.061(3) 0.054(3) -0.003(2) 0.027(3) -0.006(3)
C52 0.059(3) 0.057(3) 0.049(3) -0.011(2) 0.028(3) -0.005(2)
C53 0.075(4) 0.047(3) 0.059(3) -0.005(2) 0.025(3) 0.005(3)
C61 0.065(4) 0.057(3) 0.048(3) -0.001(2) 0.016(3) 0.009(3)
C62 0.063(4) 0.054(3) 0.084(4) 0.027(3) 0.029(3) 0.006(3)
C63 0.061(3) 0.067(3) 0.050(3) 0.011(2) 0.028(3) 0.015(3)
C71 0.054(3) 0.057(3) 0.061(3) -0.011(3) 0.010(3) -0.003(3)
C72 0.041(3) 0.061(3) 0.046(3) 0.001(2) 0.013(2) 0.002(2)
C73 0.054(3) 0.063(3) 0.043(3) 0.003(2) 0.010(2) -0.001(3)
C81 0.061(4) 0.068(4) 0.069(4) -0.012(3) 0.031(3) 0.008(3)
C82 0.090(5) 0.069(4) 0.071(4) -0.020(3) 0.047(4) -0.004(3)
C83 0.064(3) 0.057(3) 0.053(3) -0.001(2) 0.036(3) 0.003(2)
C91 0.040(3) 0.095(4) 0.045(3) 0.001(3) 0.006(2) 0.000(3)
C92 0.044(3) 0.069(3) 0.064(3) 0.008(3) 0.022(3) 0.001(3)
C93 0.058(4) 0.067(4) 0.086(4) 0.007(3) 0.024(3) -0.010(3)
C101 0.054(3) 0.064(3) 0.040(3) 0.001(2) 0.020(2) 0.001(2)
C102 0.048(3) 0.068(3) 0.056(3) -0.023(3) 0.018(3) -0.006(3)
C103 0.060(3) 0.052(3) 0.045(3) -0.001(2) 0.021(2) 0.006(2)
 
_geom_special_details
;
  All esds (except the esd in the dihedral angle between two l.s. planes)
  are estimated using the full covariance matrix.  The cell esds are taken
  into account individually in the estimation of esds in distances, angles
  and torsion angles; correlations between esds in cell parameters are only
  used when they are defined by crystal symmetry.  An approximate (isotropic)
  treatment of cell esds is used for estimating esds involving l.s. planes.
;
 
loop_
  _geom_bond_atom_site_label_1
  _geom_bond_atom_site_label_2
  _geom_bond_distance
  _geom_bond_site_symmetry_2
  _geom_bond_publ_flag
Pt1 C1 2.031(4) . ?
Pt1 C33 2.047(4) . ?
Pt1 S1 2.2926(14) . ?
Pt1 Ru3 2.7451(5) . ?
Pt1 Ru4 2.9214(4) . ?
Pt1 Ru5 2.9308(4) . ?
Pt1 Ru2 3.0254(5) . ?
Pt2 C2 2.026(4) . ?
Pt2 C83 2.056(5) . ?
Pt2 S2 2.2963(14) . ?
Pt2 Ru8 2.7466(5) . ?
Pt2 Ru10 2.9270(5) . ?
Pt2 Ru9 2.9365(5) . ?
Pt2 Ru7 3.0069(5) . ?
Ru1 C13 1.902(5) . ?
Ru1 C11 1.904(5) . ?
Ru1 C12 1.922(5) . ?
Ru1 C1 2.042(4) . ?
Ru1 Ru2 2.8261(5) . ?
Ru1 Ru4 2.8270(5) . ?
Ru1 Ru5 2.8956(6) . ?
Ru1 Ru3 2.9752(5) . ?
Ru2 C22 1.903(5) . ?
Ru2 C21 1.908(5) . ?
Ru2 C23 1.915(5) . ?
Ru2 C1 2.066(4) . ?
Ru2 Ru5 2.8529(5) . ?
Ru2 Ru3 2.9239(6) . ?
Ru3 C32 1.897(5) . ?
Ru3 C31 1.898(5) . ?
Ru3 C33 2.041(4) . ?
Ru3 C1 2.045(4) . ?
Ru3 Ru4 2.9774(6) . ?
Ru4 C41 1.896(4) . ?
Ru4 C42 1.902(5) . ?
Ru4 C43 1.922(5) . ?
Ru4 C1 2.066(4) . ?
Ru4 Ru5 2.8859(6) . ?
Ru5 C52 1.896(5) . ?
Ru5 C53 1.904(5) . ?
Ru5 C51 1.918(5) . ?
Ru5 C1 2.049(4) . ?
Ru6 C61 1.912(5) . ?
Ru6 C63 1.913(5) . ?
Ru6 C62 1.913(6) . ?
Ru6 C2 2.049(4) . ?
Ru6 Ru7 2.8189(5) . ?
Ru6 Ru9 2.8319(6) . ?
Ru6 Ru10 2.9214(6) . ?
Ru6 Ru8 2.9562(6) . ?
Ru7 C72 1.893(5) . ?
Ru7 C71 1.909(5) . ?
Ru7 C73 1.914(5) . ?
Ru7 C2 2.068(4) . ?
Ru7 Ru10 2.8664(5) . ?
Ru7 Ru8 2.9160(6) . ?
Ru8 C82 1.895(6) . ?
Ru8 C81 1.897(6) . ?
Ru8 C83 2.031(5) . ?
Ru8 C2 2.052(4) . ?
Ru8 Ru9 2.9625(6) . ?
Ru9 C91 1.890(5) . ?
Ru9 C92 1.903(5) . ?
Ru9 C93 1.909(6) . ?
Ru9 C2 2.058(4) . ?
Ru9 Ru10 2.8912(6) . ?
Ru10 C102 1.899(5) . ?
Ru10 C103 1.903(5) . ?
Ru10 C101 1.911(5) . ?
Ru10 C2 2.044(4) . ?
S1 C3 1.776(6) . ?
S1 C4 1.803(8) . ?
S2 C5 1.793(6) . ?
S2 C6 1.795(8) . ?
O11 C11 1.138(5) . ?
O12 C12 1.128(6) . ?
O13 C13 1.136(5) . ?
O21 C21 1.126(6) . ?
O22 C22 1.117(6) . ?
O23 C23 1.134(6) . ?
O31 C31 1.132(5) . ?
O32 C32 1.126(5) . ?
O33 C33 1.161(5) . ?
O41 C41 1.139(5) . ?
O42 C42 1.135(5) . ?
O43 C43 1.131(6) . ?
O51 C51 1.125(6) . ?
O52 C52 1.139(5) . ?
O53 C53 1.142(6) . ?
O61 C61 1.131(6) . ?
O62 C62 1.131(6) . ?
O63 C63 1.128(5) . ?
O71 C71 1.126(6) . ?
O72 C72 1.127(6) . ?
O73 C73 1.129(6) . ?
O81 C81 1.130(6) . ?
O82 C82 1.123(6) . ?
O83 C83 1.161(5) . ?
O91 C91 1.143(5) . ?
O92 C92 1.135(6) . ?
O93 C93 1.130(6) . ?
O101 C101 1.135(5) . ?
O102 C102 1.131(5) . ?
O103 C103 1.141(5) . ?
 
loop_
  _geom_angle_atom_site_label_1
  _geom_angle_atom_site_label_2
  _geom_angle_atom_site_label_3
  _geom_angle
  _geom_angle_site_symmetry_1
  _geom_angle_site_symmetry_3
  _geom_angle_publ_flag
C1 Pt1 C33 95.53(16) . . ?
C1 Pt1 S1 165.19(11) . . ?
C33 Pt1 S1 99.27(13) . . ?
C1 Pt1 Ru3 47.88(10) . . ?
C33 Pt1 Ru3 47.74(12) . . ?
S1 Pt1 Ru3 146.93(4) . . ?
C1 Pt1 Ru4 44.99(11) . . ?
C33 Pt1 Ru4 98.10(12) . . ?
S1 Pt1 Ru4 132.22(5) . . ?
Ru3 Pt1 Ru4 63.305(12) . . ?
C1 Pt1 Ru5 44.33(10) . . ?
C33 Pt1 Ru5 139.61(12) . . ?
S1 Pt1 Ru5 120.88(4) . . ?
Ru3 Pt1 Ru5 92.188(12) . . ?
Ru4 Pt1 Ru5 59.091(12) . . ?
C1 Pt1 Ru2 42.85(11) . . ?
C33 Pt1 Ru2 92.02(13) . . ?
S1 Pt1 Ru2 135.34(5) . . ?
Ru3 Pt1 Ru2 60.658(12) . . ?
Ru4 Pt1 Ru2 87.795(12) . . ?
Ru5 Pt1 Ru2 57.212(11) . . ?
C2 Pt2 C83 95.45(17) . . ?
C2 Pt2 S2 163.96(11) . . ?
C83 Pt2 S2 100.07(14) . . ?
C2 Pt2 Ru8 48.05(11) . . ?
C83 Pt2 Ru8 47.40(14) . . ?
S2 Pt2 Ru8 147.24(4) . . ?
C2 Pt2 Ru10 44.26(11) . . ?
C83 Pt2 Ru10 139.69(14) . . ?
S2 Pt2 Ru10 120.03(4) . . ?
Ru8 Pt2 Ru10 92.301(12) . . ?
C2 Pt2 Ru9 44.46(11) . . ?
C83 Pt2 Ru9 95.10(14) . . ?
S2 Pt2 Ru9 136.80(4) . . ?
Ru8 Pt2 Ru9 62.732(12) . . ?
Ru10 Pt2 Ru9 59.088(13) . . ?
C2 Pt2 Ru7 43.29(11) . . ?
C83 Pt2 Ru7 94.00(14) . . ?
S2 Pt2 Ru7 130.68(5) . . ?
Ru8 Pt2 Ru7 60.704(13) . . ?
Ru10 Pt2 Ru7 57.752(10) . . ?
Ru9 Pt2 Ru7 87.735(13) . . ?
C13 Ru1 C11 95.3(2) . . ?
C13 Ru1 C12 92.8(2) . . ?
C11 Ru1 C12 96.2(2) . . ?
C13 Ru1 C1 130.04(17) . . ?
C11 Ru1 C1 109.25(17) . . ?
C12 Ru1 C1 125.22(18) . . ?
C13 Ru1 Ru2 152.70(14) . . ?
C11 Ru1 Ru2 111.34(14) . . ?
C12 Ru1 Ru2 79.01(15) . . ?
C1 Ru1 Ru2 46.88(11) . . ?
C13 Ru1 Ru4 88.48(14) . . ?
C11 Ru1 Ru4 97.14(15) . . ?
C12 Ru1 Ru4 166.38(15) . . ?
C1 Ru1 Ru4 46.86(10) . . ?
Ru2 Ru1 Ru4 93.691(15) . . ?
C13 Ru1 Ru5 98.57(14) . . ?
C11 Ru1 Ru5 153.14(14) . . ?
C12 Ru1 Ru5 105.87(15) . . ?
C1 Ru1 Ru5 45.04(10) . . ?
Ru2 Ru1 Ru5 59.802(13) . . ?
Ru4 Ru1 Ru5 60.555(13) . . ?
C13 Ru1 Ru3 141.00(15) . . ?
C11 Ru1 Ru3 66.69(14) . . ?
C12 Ru1 Ru3 122.22(15) . . ?
C1 Ru1 Ru3 43.32(10) . . ?
Ru2 Ru1 Ru3 60.466(13) . . ?
Ru4 Ru1 Ru3 61.685(12) . . ?
Ru5 Ru1 Ru3 88.348(13) . . ?
C22 Ru2 C21 90.9(2) . . ?
C22 Ru2 C23 93.6(2) . . ?
C21 Ru2 C23 95.9(3) . . ?
C22 Ru2 C1 128.32(18) . . ?
C21 Ru2 C1 128.70(19) . . ?
C23 Ru2 C1 110.7(2) . . ?
C22 Ru2 Ru1 102.78(15) . . ?
C21 Ru2 Ru1 100.03(18) . . ?
C23 Ru2 Ru1 156.86(17) . . ?
C1 Ru2 Ru1 46.18(10) . . ?
C22 Ru2 Ru5 84.78(15) . . ?
C21 Ru2 Ru5 159.06(19) . . ?
C23 Ru2 Ru5 104.85(18) . . ?
C1 Ru2 Ru5 45.86(10) . . ?
Ru1 Ru2 Ru5 61.308(13) . . ?
C22 Ru2 Ru3 164.70(15) . . ?
C21 Ru2 Ru3 88.73(16) . . ?
C23 Ru2 Ru3 101.62(18) . . ?
C1 Ru2 Ru3 44.37(10) . . ?
Ru1 Ru2 Ru3 62.292(13) . . ?
Ru5 Ru2 Ru3 90.176(14) . . ?
C22 Ru2 Pt1 132.05(15) . . ?
C21 Ru2 Pt1 133.57(17) . . ?
C23 Ru2 Pt1 68.75(17) . . ?
C1 Ru2 Pt1 41.95(10) . . ?
Ru1 Ru2 Pt1 88.118(14) . . ?
Ru5 Ru2 Pt1 59.727(11) . . ?
Ru3 Ru2 Pt1 54.925(12) . . ?
C32 Ru3 C31 87.8(2) . . ?
C32 Ru3 C33 93.28(19) . . ?
C31 Ru3 C33 91.05(19) . . ?
C32 Ru3 C1 133.06(18) . . ?
C31 Ru3 C1 137.92(17) . . ?
C33 Ru3 C1 95.27(16) . . ?
C32 Ru3 Pt1 125.46(15) . . ?
C31 Ru3 Pt1 122.58(15) . . ?
C33 Ru3 Pt1 47.92(12) . . ?
C1 Ru3 Pt1 47.44(10) . . ?
C32 Ru3 Ru2 88.37(15) . . ?
C31 Ru3 Ru2 172.92(15) . . ?
C33 Ru3 Ru2 95.11(13) . . ?
C1 Ru3 Ru2 44.95(11) . . ?
Pt1 Ru3 Ru2 64.416(10) . . ?
C32 Ru3 Ru1 113.93(15) . . ?
C31 Ru3 Ru1 119.32(13) . . ?
C33 Ru3 Ru1 138.51(12) . . ?
C1 Ru3 Ru1 43.25(10) . . ?
Pt1 Ru3 Ru1 90.669(13) . . ?
Ru2 Ru3 Ru1 57.242(12) . . ?
C32 Ru3 Ru4 169.97(15) . . ?
C31 Ru3 Ru4 94.11(14) . . ?
C33 Ru3 Ru4 96.52(13) . . ?
C1 Ru3 Ru4 43.86(11) . . ?
Pt1 Ru3 Ru4 61.237(10) . . ?
Ru2 Ru3 Ru4 88.662(14) . . ?
Ru1 Ru3 Ru4 56.708(13) . . ?
C41 Ru4 C42 90.05(19) . . ?
C41 Ru4 C43 94.9(2) . . ?
C42 Ru4 C43 94.4(2) . . ?
C41 Ru4 C1 130.04(17) . . ?
C42 Ru4 C1 125.00(17) . . ?
C43 Ru4 C1 113.90(18) . . ?
C41 Ru4 Ru1 95.20(14) . . ?
C42 Ru4 Ru1 104.80(15) . . ?
C43 Ru4 Ru1 158.31(15) . . ?
C1 Ru4 Ru1 46.17(10) . . ?
C41 Ru4 Ru5 92.16(14) . . ?
C42 Ru4 Ru5 165.67(15) . . ?
C43 Ru4 Ru5 99.56(15) . . ?
C1 Ru4 Ru5 45.23(10) . . ?
Ru1 Ru4 Ru5 60.899(14) . . ?
C41 Ru4 Pt1 144.93(14) . . ?
C42 Ru4 Pt1 121.98(14) . . ?
C43 Ru4 Pt1 70.77(15) . . ?
C1 Ru4 Pt1 44.03(10) . . ?
Ru1 Ru4 Pt1 90.178(14) . . ?
Ru5 Ru4 Pt1 60.617(11) . . ?
C41 Ru4 Ru3 152.77(14) . . ?
C42 Ru4 Ru3 83.13(14) . . ?
C43 Ru4 Ru3 111.88(14) . . ?
C1 Ru4 Ru3 43.31(10) . . ?
Ru1 Ru4 Ru3 61.607(11) . . ?
Ru5 Ru4 Ru3 88.488(13) . . ?
Pt1 Ru4 Ru3 55.458(11) . . ?
C52 Ru5 C53 93.3(2) . . ?
C52 Ru5 C51 94.5(2) . . ?
C53 Ru5 C51 99.1(2) . . ?
C52 Ru5 C1 122.59(18) . . ?
C53 Ru5 C1 115.64(19) . . ?
C51 Ru5 C1 124.99(18) . . ?
C52 Ru5 Ru2 165.70(15) . . ?
C53 Ru5 Ru2 86.19(15) . . ?
C51 Ru5 Ru2 99.69(15) . . ?
C1 Ru5 Ru2 46.35(11) . . ?
C52 Ru5 Ru4 78.57(15) . . ?
C53 Ru5 Ru4 135.89(17) . . ?
C51 Ru5 Ru4 124.52(16) . . ?
C1 Ru5 Ru4 45.70(10) . . ?
Ru2 Ru5 Ru4 91.879(14) . . ?
C52 Ru5 Ru1 122.16(15) . . ?
C53 Ru5 Ru1 144.47(16) . . ?
C51 Ru5 Ru1 82.06(15) . . ?
C1 Ru5 Ru1 44.85(10) . . ?
Ru2 Ru5 Ru1 58.889(11) . . ?
Ru4 Ru5 Ru1 58.547(12) . . ?
C52 Ru5 Pt1 102.75(15) . . ?
C53 Ru5 Pt1 80.10(16) . . ?
C51 Ru5 Pt1 162.74(15) . . ?
C1 Ru5 Pt1 43.83(10) . . ?
Ru2 Ru5 Pt1 63.061(13) . . ?
Ru4 Ru5 Pt1 60.292(11) . . ?
Ru1 Ru5 Pt1 88.663(12) . . ?
C61 Ru6 C63 91.7(2) . . ?
C61 Ru6 C62 96.2(2) . . ?
C63 Ru6 C62 96.2(2) . . ?
C61 Ru6 C2 110.31(19) . . ?
C63 Ru6 C2 128.92(19) . . ?
C62 Ru6 C2 124.70(18) . . ?
C61 Ru6 Ru7 103.98(14) . . ?
C63 Ru6 Ru7 164.23(15) . . ?
C62 Ru6 Ru7 80.41(15) . . ?
C2 Ru6 Ru7 47.08(11) . . ?
C61 Ru6 Ru9 104.99(17) . . ?
C63 Ru6 Ru9 84.00(16) . . ?
C62 Ru6 Ru9 158.78(17) . . ?
C2 Ru6 Ru9 46.54(11) . . ?
Ru7 Ru6 Ru9 93.592(16) . . ?
C61 Ru6 Ru10 154.68(15) . . ?
C63 Ru6 Ru10 106.00(15) . . ?
C62 Ru6 Ru10 99.62(16) . . ?
C2 Ru6 Ru10 44.39(11) . . ?
Ru7 Ru6 Ru10 59.883(12) . . ?
Ru9 Ru6 Ru10 60.311(14) . . ?
C61 Ru6 Ru8 66.40(15) . . ?
C63 Ru6 Ru8 129.77(15) . . ?
C62 Ru6 Ru8 129.20(17) . . ?
C2 Ru6 Ru8 43.91(11) . . ?
Ru7 Ru6 Ru8 60.598(14) . . ?
Ru9 Ru6 Ru8 61.526(13) . . ?
Ru10 Ru6 Ru8 88.286(13) . . ?
C72 Ru7 C71 90.4(2) . . ?
C72 Ru7 C73 91.8(2) . . ?
C71 Ru7 C73 98.3(2) . . ?
C72 Ru7 C2 128.09(18) . . ?
C71 Ru7 C2 127.62(19) . . ?
C73 Ru7 C2 112.21(18) . . ?
C72 Ru7 Ru6 105.21(14) . . ?
C71 Ru7 Ru6 94.91(16) . . ?
C73 Ru7 Ru6 158.33(16) . . ?
C2 Ru7 Ru6 46.50(11) . . ?
C72 Ru7 Ru10 84.16(14) . . ?
C71 Ru7 Ru10 153.37(16) . . ?
C73 Ru7 Ru10 107.88(15) . . ?
C2 Ru7 Ru10 45.47(11) . . ?
Ru6 Ru7 Ru10 61.834(14) . . ?
C72 Ru7 Ru8 167.19(14) . . ?
C71 Ru7 Ru8 89.65(17) . . ?
C73 Ru7 Ru8 100.84(16) . . ?
C2 Ru7 Ru8 44.71(10) . . ?
Ru6 Ru7 Ru8 62.030(14) . . ?
Ru10 Ru7 Ru8 90.128(15) . . ?
C72 Ru7 Pt2 129.35(15) . . ?
C71 Ru7 Pt2 137.61(17) . . ?
C73 Ru7 Pt2 70.04(15) . . ?
C2 Ru7 Pt2 42.19(10) . . ?
Ru6 Ru7 Pt2 88.646(14) . . ?
Ru10 Ru7 Pt2 59.725(11) . . ?
Ru8 Ru7 Pt2 55.230(12) . . ?
C82 Ru8 C81 88.8(2) . . ?
C82 Ru8 C83 92.2(2) . . ?
C81 Ru8 C83 92.8(2) . . ?
C82 Ru8 C2 130.7(2) . . ?
C81 Ru8 C2 139.0(2) . . ?
C83 Ru8 C2 95.41(17) . . ?
C82 Ru8 Pt2 120.89(18) . . ?
C81 Ru8 Pt2 127.13(17) . . ?
C83 Ru8 Pt2 48.16(13) . . ?
C2 Ru8 Pt2 47.25(11) . . ?
C82 Ru8 Ru7 85.61(18) . . ?
C81 Ru8 Ru7 168.67(17) . . ?
C83 Ru8 Ru7 97.28(14) . . ?
C2 Ru8 Ru7 45.17(11) . . ?
Pt2 Ru8 Ru7 64.066(11) . . ?
C82 Ru8 Ru6 114.41(17) . . ?
C81 Ru8 Ru6 116.80(17) . . ?
C83 Ru8 Ru6 139.22(13) . . ?
C2 Ru8 Ru6 43.83(11) . . ?
Pt2 Ru8 Ru6 91.074(13) . . ?
Ru7 Ru8 Ru6 57.371(12) . . ?
C82 Ru8 Ru9 171.59(18) . . ?
C81 Ru8 Ru9 95.38(16) . . ?
C83 Ru8 Ru9 94.86(14) . . ?
C2 Ru8 Ru9 43.96(11) . . ?
Pt2 Ru8 Ru9 61.771(11) . . ?
Ru7 Ru8 Ru9 88.962(14) . . ?
Ru6 Ru8 Ru9 57.172(14) . . ?
C91 Ru9 C92 91.5(2) . . ?
C91 Ru9 C93 93.9(2) . . ?
C92 Ru9 C93 93.7(2) . . ?
C91 Ru9 C2 128.74(19) . . ?
C92 Ru9 C2 126.34(19) . . ?
C93 Ru9 C2 113.7(2) . . ?
C91 Ru9 Ru6 96.52(17) . . ?
C92 Ru9 Ru6 104.25(16) . . ?
C93 Ru9 Ru6 158.93(18) . . ?
C2 Ru9 Ru6 46.27(11) . . ?
C91 Ru9 Ru10 89.67(16) . . ?
C92 Ru9 Ru10 165.61(16) . . ?
C93 Ru9 Ru10 100.51(18) . . ?
C2 Ru9 Ru10 44.99(11) . . ?
Ru6 Ru9 Ru10 61.377(14) . . ?
C91 Ru9 Pt2 141.36(17) . . ?
C92 Ru9 Pt2 123.80(16) . . ?
C93 Ru9 Pt2 70.83(18) . . ?
C2 Ru9 Pt2 43.58(11) . . ?
Ru6 Ru9 Pt2 89.809(14) . . ?
Ru10 Ru9 Pt2 60.293(11) . . ?
C91 Ru9 Ru8 155.22(17) . . ?
C92 Ru9 Ru8 84.21(16) . . ?
C93 Ru9 Ru8 110.74(19) . . ?
C2 Ru9 Ru8 43.79(11) . . ?
Ru6 Ru9 Ru8 61.302(13) . . ?
Ru10 Ru9 Ru8 88.734(14) . . ?
Pt2 Ru9 Ru8 55.498(12) . . ?
C102 Ru10 C103 92.1(2) . . ?
C102 Ru10 C101 90.3(2) . . ?
C103 Ru10 C101 100.6(2) . . ?
C102 Ru10 C2 127.13(19) . . ?
C103 Ru10 C2 113.29(18) . . ?
C101 Ru10 C2 126.04(18) . . ?
C102 Ru10 Ru7 172.82(16) . . ?
C103 Ru10 Ru7 89.43(14) . . ?
C101 Ru10 Ru7 96.37(14) . . ?
C2 Ru10 Ru7 46.16(11) . . ?
C102 Ru10 Ru9 82.23(15) . . ?
C103 Ru10 Ru9 128.48(16) . . ?
C101 Ru10 Ru9 130.45(15) . . ?
C2 Ru10 Ru9 45.38(11) . . ?
Ru7 Ru10 Ru9 91.351(15) . . ?
C102 Ru10 Ru6 119.87(17) . . ?
C103 Ru10 Ru6 147.70(14) . . ?
C101 Ru10 Ru6 85.08(15) . . ?
C2 Ru10 Ru6 44.52(11) . . ?
Ru7 Ru10 Ru6 58.283(12) . . ?
Ru9 Ru10 Ru6 58.312(12) . . ?
C102 Ru10 Pt2 111.16(17) . . ?
C103 Ru10 Pt2 74.61(15) . . ?
C101 Ru10 Pt2 158.00(14) . . ?
C2 Ru10 Pt2 43.76(11) . . ?
Ru7 Ru10 Pt2 62.523(13) . . ?
Ru9 Ru10 Pt2 60.619(11) . . ?
Ru6 Ru10 Pt2 88.276(12) . . ?
C3 S1 C4 96.6(4) . . ?
C3 S1 Pt1 109.6(2) . . ?
C4 S1 Pt1 108.1(3) . . ?
C5 S2 C6 97.2(3) . . ?
C5 S2 Pt2 110.0(2) . . ?
C6 S2 Pt2 107.2(3) . . ?
Pt1 C1 Ru1 177.2(2) . . ?
Pt1 C1 Ru3 84.68(14) . . ?
Ru1 C1 Ru3 93.43(15) . . ?
Pt1 C1 Ru5 91.84(15) . . ?
Ru1 C1 Ru5 90.11(14) . . ?
Ru3 C1 Ru5 176.1(2) . . ?
Pt1 C1 Ru4 90.99(15) . . ?
Ru1 C1 Ru4 86.98(14) . . ?
Ru3 C1 Ru4 92.83(15) . . ?
Ru5 C1 Ru4 89.07(14) . . ?
Pt1 C1 Ru2 95.21(15) . . ?
Ru1 C1 Ru2 86.94(14) . . ?
Ru3 C1 Ru2 90.68(14) . . ?
Ru5 C1 Ru2 87.79(15) . . ?
Ru4 C1 Ru2 173.1(2) . . ?
Pt2 C2 Ru10 91.98(15) . . ?
Pt2 C2 Ru6 176.8(2) . . ?
Ru10 C2 Ru6 91.09(15) . . ?
Pt2 C2 Ru8 84.70(14) . . ?
Ru10 C2 Ru8 176.2(2) . . ?
Ru6 C2 Ru8 92.27(15) . . ?
Pt2 C2 Ru9 91.95(15) . . ?
Ru10 C2 Ru9 89.63(15) . . ?
Ru6 C2 Ru9 87.20(15) . . ?
Ru8 C2 Ru9 92.25(15) . . ?
Pt2 C2 Ru7 94.53(16) . . ?
Ru10 C2 Ru7 88.38(15) . . ?
Ru6 C2 Ru7 86.43(15) . . ?
Ru8 C2 Ru7 90.11(15) . . ?
Ru9 C2 Ru7 173.3(2) . . ?
O11 C11 Ru1 167.6(4) . . ?
O12 C12 Ru1 175.7(5) . . ?
O13 C13 Ru1 178.0(5) . . ?
O21 C21 Ru2 175.2(6) . . ?
O22 C22 Ru2 178.1(5) . . ?
O23 C23 Ru2 173.3(5) . . ?
O31 C31 Ru3 176.2(4) . . ?
O32 C32 Ru3 176.6(5) . . ?
O33 C33 Ru3 141.0(4) . . ?
O33 C33 Pt1 134.6(4) . . ?
Ru3 C33 Pt1 84.35(16) . . ?
O41 C41 Ru4 178.7(4) . . ?
O42 C42 Ru4 175.9(4) . . ?
O43 C43 Ru4 172.5(5) . . ?
O51 C51 Ru5 176.7(5) . . ?
O52 C52 Ru5 176.1(5) . . ?
O53 C53 Ru5 178.3(5) . . ?
O61 C61 Ru6 167.2(5) . . ?
O62 C62 Ru6 178.6(5) . . ?
O63 C63 Ru6 176.6(5) . . ?
O71 C71 Ru7 175.2(6) . . ?
O72 C72 Ru7 177.1(5) . . ?
O73 C73 Ru7 172.8(5) . . ?
O81 C81 Ru8 176.7(5) . . ?
O82 C82 Ru8 177.0(6) . . ?
O83 C83 Ru8 141.5(4) . . ?
O83 C83 Pt2 134.0(4) . . ?
Ru8 C83 Pt2 84.44(18) . . ?
O91 C91 Ru9 178.8(5) . . ?
O92 C92 Ru9 175.8(5) . . ?
O93 C93 Ru9 172.3(6) . . ?
O101 C101 Ru10 177.4(5) . . ?
O102 C102 Ru10 176.8(5) . . ?
O103 C103 Ru10 175.5(5) . . ?
 
_diffrn_measured_fraction_theta_max    0.997
_diffrn_reflns_theta_full              26.07
_diffrn_measured_fraction_theta_full   0.997
_refine_diff_density_max    1.302
_refine_diff_density_min   -0.935
_refine_diff_density_rms    0.117

#===END
